# Supplementary material for: Proteotoxicity from aberrant ribosome biogenesis compromises cell fitness
Source: eLife. 2019 Mar 7;8:e43002. doi: 10.7554/eLife.43002 (PMC6453566; doi:10.7554/eLife.43002)
Supplement: Supplementary file 1. [file elife-43002-supp1.xlsx]

## Sheet: Sheet1
Name (YBT#)	Description	Background	Genotype	Source	Figures
21	WTAA	BY4741	TOR1-1 fpr1Δ RPL13A-2xFKBP12::NATMX6 RPB3-3xFLAG	This study	1-Supp 2
26	NRD1AA	BY4741	TOR1-1 fpr1Δ RPL13A-2xFKBP12::NATMX6 RPB3-3xFLAG NRD1-FRB-GFP::KANMX6	This study	1-Supp 2C,F
27	RAT1AA	BY4741	TOR1-1 fpr1Δ RPL13A-2xFKBP12::NATMX6 RPB3-3xFLAG RAT1-FRB-GFP::KANMX6	This study	1-Supp 2C,F
96	RAT1AA HSE-GFP	BY4741	TOR1-1 fpr1Δ RPL13A-2xFKBP12::NATMX6 RPB3-3xFLAG RAT1-FRB-GFP::KANMX6 ura3Δ0::4xHSE-GFP::URA3	This study	1-Supp 2D,E
100	RAT1AID	BY4741	leu2Δ0::GPD1pr-osTIR1::LEU2 RPB3-3xFLAG RAT1-V5-IAA7::KANMX6	This study	1C, 1D, 1E, 3A, 3B, 1-Supp 1A,B,D,E, 1-Supp 2A
152	DXO1AID	BY4741	leu2Δ0::GPD1pr-osTIR1::LEU2 DXO1-V5-IAA7::KANMX6	This study	1-Supp 2A
154	RTT103AID	BY4741	leu2Δ0::GPD1pr-osTIR1::LEU2 RTT103-V5-IAA7::KANMX6	This study	1-Supp 2A
155	WTAID	BY4741	leu2Δ0::GPD1pr-osTIR1::LEU2 RPB3-3xFLAG	This study	1D, 1E, 3A, 3B, 1-Supp 1D,E
156	RAT1AID HSE-GFP	BY4741	leu2Δ0::GPD1pr-osTIR1::LEU2 RPB3-3xFLAG RAT1-V5-IAA7::KANMX6 ura3Δ0::4xHSE-GFP::URA3	This study	4-Supp 1A
162	RAT1AA rqc2Δ	BY4741	TOR1-1 fpr1Δ RPL13A-2xFKBP12::NATMX6 RPB3-3xFLAG RAT1-FRB-GFP::KANMX6 rqc2Δ::HIS3MX6	This study	1-Supp 1C
171	RRP17AID	BY4741	leu2Δ0::GPD1pr-osTIR1::LEU2 RPB3-3xFLAG RRP17-V5-IAA7::KANMX6	This study	1C, 1D, 1E, 3A, 3B, 1-Supp 1D
173	XRN1AID	BY4741	leu2Δ0::GPD1pr-osTIR1::LEU2 RPB3-3xFLAG XRN1-V5-IAA7::KANMX6	This study	1-Supp 2B
174	RRP44AID	BY4741	leu2Δ0::GPD1pr-osTIR1::LEU2 RPB3-3xFLAG RRP44-V5-IAA7::KANMX6	This study	1C, 1D, 1E, 3A, 3B, 1-Supp 1D
178	LAS1AID	BY4741	leu2Δ0::GPD1pr-osTIR1::LEU2 RPB3-3xFLAG LAS1-V5-IAA7::KANMX6	This study	1C, 1D, 1E, 3A, 3B, 1-Supp 1D
187	HSF1	W303a	hsf1Δ::KANMX6 leu2-3,112::HSE-mVenus::LEU2 trp1-1::HSF1pr-HSF1::TRP1	(Zheng et al., 2016)	6A, 6B
191	HSF1PO4*	W303a	hsf1Δ::KANMX6 leu2-3,112::HSE-mVenus::LEU2 trp1-1::HSF1pr-HSF1PO4*::TRP1	(Zheng et al., 2016)	6A, 6B
194	Estradiol OE parent	W303a	ura3-1::GAL4-ER-MSN2AD::URA3	D. Pincus
196	HSF1DBD-VP16	W303a	hsf1Δ::KANMX6 his3-11:: GAL4-ER-MSN2AD::HIS3 leu2-3,112::HSE-mVenus::LEU2 trp1-1::GAL1pr-HSF1DBD-VP16::TRP1	(Zheng et al., 2016)	6E, 6-Supp 2
197	HSF1 control	W303a	hsf1Δ::KANMX6 his3-11:: GAL4-ER-MSN2AD::HIS3 leu2-3,112::HSE-mVenus::LEU2 trp1-1::HSF1pr-HSF1::TRP1	(Zheng et al., 2016)	6F
211	TSR2AID	BY4741	leu2Δ0::GPD1pr-osTIR1::LEU2 RPB3-3xFLAG TSR2-V5-IAA7::KANMX6	This study	2F
212	YAR1AID	BY4741	leu2Δ0::GPD1pr-osTIR1::LEU2 RPB3-3xFLAG YAR1-V5-IAA7::KANMX6	This study	2F
215	GAL-GFP-V5	W303a	ura3-1::GAL4-ER-MSN2AD::URA3 his3-11::GAL1pr-GFP-V5::HIS3	This study	3E, 4D, 4F
216	GAL-RPS3-V5	W303a	ura3-1::GAL4-ER-MSN2AD::URA3 his3-11::GAL1pr-RPS3-V5::HIS3	This study	3D, 4D, 4F
219	SQT1AID	BY4741	leu2Δ0::GPD1pr-osTIR1::LEU2 RPB3-3xFLAG SQT1-V5-IAA7::KANMX6	This study	2F
223	GAL-RPL3-V5	W303a	ura3-1::GAL4-ER-MSN2AD::URA3 his3-11::GAL1pr-RPL3-V5::HIS3	This study	3E, 4D, 4E, 4F
224	GAL-RPL4-V5	W303a	ura3-1::GAL4-ER-MSN2AD::URA3 his3-11::GAL1pr-RPL4-V5::HIS3	This study	4D, 4F
225	GAL-RPL10-V5	W303a	ura3-1::GAL4-ER-MSN2AD::URA3 his3-11::GAL1pr-RPL10-V5::HIS3	This study	3E, 4D, 4E, 4F, 4-Supp 1B
226	GAL-RPS26-V5	W303a	ura3-1::GAL4-ER-MSN2AD::URA3 his3-11::GAL1pr-RPS26-V5::HIS3	This study	4D, 4F
232	mCherry query parent	FY4	HO::mCherry::KANMX6	This study	6D, 6-Supp 1
235	rpn4Δ query	FY4	HO::mCherry::KANMX6 rpn4Δ::NATMX6	This study	6D, 6-Supp 1
236	tmc1Δ query	FY4	HO::mCherry::KANMX6 tmc1Δ::NATMX6	This study	6-Supp 1
237	hsp104Δ query	FY4	HO::mCherry::KANMX6 hsp104Δ::NATMX6	This study	6-Supp 1
238	hsp26Δ query	FY4	HO::mCherry::KANMX6 hsp26Δ::NATMX6	This study	6-Supp 1
239	pre9Δ query	FY4	HO::mCherry::KANMX6 pre9Δ::NATMX6	This study	6-Supp 1
240	btn2Δ query	FY4	HO::mCherry::KANMX6 btn2Δ::NATMX6	This study	6-Supp 1
241	hsp42Δ query	FY4	HO::mCherry::KANMX6 hsp42Δ::NATMX6	This study	6-Supp 1
242	hsp12Δ query	FY4	HO::mCherry::KANMX6 hsp12Δ::NATMX6	This study	6-Supp 1
243	TB50a	TB50a		T. Powers	1G (rap)
256	HSE-Venus	BY4741	leu2Δ::HSE-mVenus:LEU2	This study	4A, 7A, 7-Supp 1A
259	DRG1	BY4741	drg1Δ::NATMX6 pBT124 (pRS316 DRG1 URA3 CEN/ARS)	This study	2-Supp 1
260	DRG1V725E	BY4741	drg1Δ::NATMX6 pBT125 (pRS316 DRG1V725E URA3 CEN/ARS)	This study	2-Supp 1
261	YFP reference	FY4	HO::YFP::KANMX6	This study	6D, 6-Supp 1
	Sis1-YFP/Cfi1-mKate	W303a	ADE2 SIS1-YFP::HIS3 CFI1-mKate:URA3	D. Pincus	5A, 5B, 5C
	Hsp104-mKate	W303a	ADE2 SIS1-YFP::HIS3 leu2-3,112::HSP104-mKate::LEU2	D. Pincus	5D
	W303a WT	W303a	ADE2	D. Pincus	7B, 7-Supp 1B
	sch9Δ	W303a	ADE2 sch9Δ::KANMX6	D. Pincus	7B, 7-Supp 1 B
		BY4741	RPB3-3xFLAG::NATMX6	(Churchman and Weissman, 2011)	1E, 2D, 3A, 3B (diamide RNA-seq)
	Anchor-away parent	BY4741	TOR1-1 fpr1Δ RPL13A-2xFKBP12::NATMX6	F. Holstege
		BY4741		Euroscarf	1E (diamide), 1G (CHX), 2B, 2C, 2D, 3A, 3B, 3F, 4C, 2-Supp 2
Parental genotypes:
FY4	MATa
BY4741	MATa his3Δ1 leu2Δ0 met15Δ0 ura3Δ0
W303a	MATa leu2-3,112 trp1-1 can1-100 ura3-1 his3-11,15 ADE2+
TB50a	MATa leu2-3,112 ura3-52 rme1 trp1 his4
