# Supplementary material for: Proteotoxicity from aberrant ribosome biogenesis compromises cell fitness
Source: eLife. 2019 Mar 7;8:e43002. doi: 10.7554/eLife.43002 (PMC6453566; doi:10.7554/eLife.43002)
Supplement: Supplementary file 2. [file elife-43002-supp2.xlsx]

## Sheet: Sheet1
Name	Plasmid	Use	Reference/source
	pFA6a FRB-GFP::KANMX6	C-terminal tagging for anchor-away	(Haruki et al., 2008)
L260	pFA6a V5-IAA7::KANMX6	C-terminal tagging for AID	F. Winston
pTIR4	pNH605 GPD1pr-OsTIR1::LEU2	Integrate OsTIR1 at LEU2	F. Winston
pZM467	3xFLAG-URA3-3xFLAG	Scarless C-terminal FLAG-tagging	(Moqtaderi and Struhl, 2008)
pVD302	4xHSE-GFP::URA3	Insert HSE-GFP reporter at URA3	(Solís et al., 2016)
pDP122	pNH605 4xHSE-mVenus::LEU2	Insert HSE-mVenus reporter at LEU2	(Zheng et al., 2016)
	pFA6a HIS3MX6	Gene deletion with HIS3	Euroscarf
	pFA6a NATMX6	Gene deletion with NAT	Euroscarf
	pNH603 GAL1pr::HIS3	Integrate V5-tagged ORFs for induction by estradiol (GEM)	D. Pincus
pBT124	pRS316 DRG1 URA3 CEN/ARS	DRG1 plasmid cover	This study
pBT125	pRS316 DRG1V725E URA3 CEN/ARS	DRG1V725E plasmid cover	This study
