# Supplementary material for: Proteotoxicity from aberrant ribosome biogenesis compromises cell fitness
Source: eLife. 2019 Mar 7;8:e43002. doi: 10.7554/eLife.43002 (PMC6453566; doi:10.7554/eLife.43002)
Supplement: Supplementary file 3. [file elife-43002-supp3.xlsx]

## Sheet: Sheet1
Name	Target	Use	Sequence
oBT220	GFP RNA	Northern (PCR/dsDNA)	CCAAAGGAGAAGAACTTTTC
oBT221	GFP RNA	Northern (PCR/dsDNA)	ATGCCGTTTCATATGATCTG
oBT271	SCR1 RNA	Northern (Oligo)	GTCTAGCCGCGAGGAAGG
oBT305	HSP82 RNA	Northern (PCR/dsDNA)	CATGCAGATGCCCTATTTAC
oBT306	HSP82 RNA	Northern (PCR/dsDNA)	GAACATCATGGCCTTGAATA
oBT313	TPS2 RNA	Northern (PCR/dsDNA)	GACATGTTGAAGGGAATCAG
oBT314	TPS2 RNA	Northern (PCR/dsDNA)	CTAAAGTCTCCAGGACTTGC
oBT319	BTN2 RNA	Northern (PCR/dsDNA)	GCGAAAGAACCACTAACCAA
oBT320	BTN2 RNA	Northern (PCR/dsDNA)	AGAGATAGGCAATGATTTGG
oBT361	5.8S pre-rRNA (017)	Northern (Oligo)	GCGTTGTTCATCGATGC
oBT509	35S pre-rRNA (800)	Northern (Oligo)	GCAAAGATATGAAAACTCCAC
oBT524	mVenus RNA	Northern (PCR/dsDNA)	GGTTATGGTTTGCAATGTTTTG
oBT525	mVenus RNA	Northern (PCR/dsDNA)	CCATTCTTTTGTTTGTCAGC
oBT526	GAL7 RNA	Northern (PCR/dsDNA)	CCTTGGTTAGGTCAACAGGAG
oBT527	GAL7 RNA	Northern (PCR/dsDNA)	AGTCGCATTCAAAGGAGCC
oBT528	GAL10/lncGAL10 RNA	Northern (PCR/dsDNA)	GCATCACATTCCCTTCTATGAG
oBT529	GAL10/lncGAL10 RNA	Northern (PCR/dsDNA)	ACGATTAGCATACCTGCCG
SD189	HSP12 RNA	Northern (PCR/dsDNA)	TCTGACGCAGGTAGAAAAGG
SD190	HSP12 RNA	Northern (PCR/dsDNA)	GTTGGGTCTTCTTCACCG
oBT335	HSP82 promoter	ChIP-qPCR	GTCACATATTGTTCGAACAATTCTGG
oBT336	HSP82 promoter	ChIP-qPCR	CTTCCACGGCGTTCTAGAAAAAAAAG
oBT337	HSP104 promoter	ChIP-qPCR	CTTAAACGTTCCATAAGGGGC
oBT338	HSP104 promoter	ChIP-qPCR	TGCAGTTCTTTGAGATGGGCC
oBT339	SSA4 promoter	ChIP-qPCR	GCCGCACATCCATTCCGGTATG
oBT340	SSA4 promoter	ChIP-qPCR	CGGGCAAAAGATATCCGCTTTG
oBT341	ARS504 promoter	ChIP-qPCR	GTCAGACCTGTTCCTTTAAGAGG
oBT342	ARS504 promoter	ChIP-qPCR	CATACCCTCGGGTCAAACAC
