# Supplementary material for: Proteotoxicity from aberrant ribosome biogenesis compromises cell fitness
Source: eLife. 2019 Mar 7;8:e43002. doi: 10.7554/eLife.43002 (PMC6453566; doi:10.7554/eLife.43002)
Supplement: Supplementary file 5. — Query (mCh) and reference (YFP) counts for each competition at t = 0, 1, 2, 3, 4, 5 days. Each mutant query had four isolates (‘Iso1-4’) that were tested in two technical replicates (‘Rep1-2’), for a total of eight replicates per experiment. The normalized, log10 transformed values were used to generate plots. [file elife-43002-supp5.xlsx]

## Sheet: Sheet1
condition	query_strain	isolate	technical_replicate	ref_counts_t0	ref_counts_t1	ref_counts_t2	ref_counts_t3	ref_counts_t4	ref_counts_t5	query_counts_t0	query_counts_t1	query_counts_t2	query_counts_t3	query_counts_t4	query_counts_t5	log10_norm_query_ref_t0	log10_norm_query_ref_t1	log10_norm_query_ref_t2	log10_norm_query_ref_t3	log10_norm_query_ref_t4	log10_norm_query_ref_t5
YPD	Tmc1	Iso1	Rep1	6693	16813	13707	14741	16904	17498	8259	17733	14109	16472	19194	21699	0	0.331855	0.232569	0.299819	0.366238	0.419512
YPD	Tmc1	Iso2	Rep1	4963	13043	13762	9912	10243	13654	6062	12976	13646	10161	11049	16228	0	0.330525	0.352389	0.224321	0.260707	0.427649
YPD	Tmc1	Iso3	Rep1	5217	18658	19209	7626	11877	6948	6172	24724	28134	11596	21132	13368	0	0.602693	0.658806	0.273882	0.534515	0.335641
YPD	Tmc1	Iso4	Rep1	3664	15837	27107	12855	16890	25956	3580	10730	12792	4219	3775	4036	0	0.476717	0.553055	0.0713265	0.0230339	0.0520681
YPD	Tmc1	Iso1	Rep2	8198	23089	15524	10094	15478	17163	8902	21723	14232	9450	15845	18417	0	0.387432	0.203778	0.0259442	0.250405	0.315731
YPD	Tmc1	Iso2	Rep2	6992	21856	16407	8590	14974	9670	7491	24494	19524	10674	21283	14963	0	0.51452	0.416029	0.153787	0.453493	0.300479
YPD	Tmc1	Iso3	Rep2	16691	10159	19275	15631	20277	8128	20507	13008	26052	23510	32641	14571	0	-0.197692	0.103939	0.0593505	0.201861	-0.148413
YPD	Tmc1	Iso4	Rep2	12733	8402	14175	26140	20701	19029	14808	7432	8957	11587	6422	4126	0	-0.299391	-0.218334	-0.106525	-0.362826	-0.554967
DZA30	Tmc1	Iso1	Rep1	4365	10779	7899	10049	9056	13242	5480	11834	8973	11735	10247	14932	0	0.334351	0.214157	0.330703	0.271816	0.435337
DZA30	Tmc1	Iso2	Rep1	3336	179	479	152	2662	415	4135	227	496	190	2820	444	0	-1.26045	-0.920994	-1.33772	-0.166226	-0.969093
DZA30	Tmc1	Iso3	Rep1	3264	12971	14560	10351	5134	7010	4447	18265	21454	15800	7782	10080	0	0.613553	0.683441	0.55059	0.243024	0.355393
DZA30	Tmc1	Iso4	Rep1	1390	241	841	512	4475	14	1361	221	809	469	3818	16	0	-0.789466	-0.22591	-0.462685	0.447978	-1.92974
DZA30	Tmc1	Iso1	Rep2	4424	12685	7684	6994	8873	12013	4661	14005	8992	8761	11231	14654	0	0.477804	0.285377	0.274075	0.381939	0.497477
DZA30	Tmc1	Iso2	Rep2	2339	1529	5343	3332	269	1942	2854	1685	6294	4393	357	2344	0	-0.228854	0.343473	0.187307	-0.902786	-0.0854964
DZA30	Tmc1	Iso3	Rep2	6158	5895	10370	8517	9187	4424	8304	8153	14488	12492	13737	6099	0	-0.0079699	0.241721	0.177345	0.218605	-0.134029
DZA30	Tmc1	Iso4	Rep2	2971	305	966	315	910	4678	3775	391	1213	378	968	4602	0	-0.98474	-0.493056	-0.999425	-0.591042	0.0860297
DZA15	Tmc1	Iso1	Rep1	6014	15025	11283	9561	16876	16286	7645	15961	12837	11331	21345	20474	0	0.319683	0.225086	0.170891	0.445919	0.427825
DZA15	Tmc1	Iso2	Rep1	4369	8091	6662	6977	3818	656	5628	6481	6836	7495	4406	873	0	0.0612879	0.084448	0.124418	-0.10631	-0.80934
DZA15	Tmc1	Iso3	Rep1	3520	18429	12773	8236	13784	8765	4696	25454	18988	13226	22887	14620	0	0.734028	0.606751	0.4497	0.687861	0.493219
DZA15	Tmc1	Iso4	Rep1	3023	51	6999	1344	5715	588	2955	33	4978	799	3243	322	0	-1.95204	0.226497	-0.568011	0.0403895	-0.962702
DZA15	Tmc1	Iso1	Rep2	6424	20750	14071	11450	16317	12101	7121	20880	15125	12547	19265	14718	0	0.46719	0.327154	0.245999	0.432228	0.315308
DZA15	Tmc1	Iso2	Rep2	1604	71	887	956	720	2178	1881	80	1049	1227	1042	3511	0	-1.3713	-0.253613	-0.185544	-0.256521	0.271042
DZA15	Tmc1	Iso3	Rep2	11836	14991	12143	8581	7936	8454	15211	19758	17633	13565	13080	14536	0	0.113585	0.0641684	-0.049738	-0.06555	-0.0197129
DZA15	Tmc1	Iso4	Rep2	5229	0	395	225	0	11952	6035	0	394	186	0	7565	0	#DIV/0!	-1.18518	-1.51116	#DIV/0!	0.0981317
DMSO	Tmc1	Iso1	Rep1	5176	9690	10745	8472	11115	12993	6363	10415	11288	9252	12362	15792	0	0.213997	0.248955	0.162574	0.288427	0.394775
DMSO	Tmc1	Iso2	Rep1	5577	6768	15114	12158	11160	13900	6542	6858	14485	12478	12799	17083	0	0.0204869	0.345208	0.280434	0.291465	0.416854
DMSO	Tmc1	Iso3	Rep1	3790	12609	12648	7952	11859	4794	4874	17612	18994	12843	21637	9545	0	0.557923	0.590731	0.420781	0.647312	0.29189
DMSO	Tmc1	Iso4	Rep1	4304	12497	29503	15297	10564	28993	4142	7883	14378	5032	2402	4271	0	0.279481	0.540488	0.0845305	-0.236637	0.0133195
DMSO	Tmc1	Iso1	Rep2	6150	11139	8326	8871	12254	11796	6737	11221	7906	8313	12723	12863	0	0.221565	0.0694903	0.0912912	0.276123	0.280876
DMSO	Tmc1	Iso2	Rep2	8153	13645	7508	8512	10735	7666	9171	15221	9335	11087	15436	11917	0	0.220026	0.00769763	0.0823974	0.226118	0.11375
DMSO	Tmc1	Iso3	Rep2	16548	7280	9113	7158	8772	7302	21110	9643	13200	10660	14152	13544	0	-0.340276	-0.203914	-0.296731	-0.17367	-0.192741
DMSO	Tmc1	Iso4	Rep2	14817	11119	13537	20956	27727	13922	18361	10045	8689	9198	8635	3075	0	-0.261946	-0.324927	-0.300203	-0.327634	-0.776051
AZC	Tmc1	Iso1	Rep1	5143	773	949	549	1129	207	6357	1677	2959	2775	8467	1959	0	-0.578719	-0.332107	-0.359989	0.124477	-0.511218
AZC	Tmc1	Iso2	Rep1	4258	2262	2536	1103	668	194	5069	3509	6210	4308	13715	19622	0	-0.159739	0.0881693	-0.0706466	0.432274	0.587821
AZC	Tmc1	Iso3	Rep1	2305	1391	1065	740	1466	4088	3034	3003	3444	3005	2788	2964	0	-0.00446024	0.0550476	-0.0041711	-0.0367228	-0.0101374
AZC	Tmc1	Iso4	Rep1	2437	6527	10596	14211	17644	13466	2188	2309	1664	367	37	12	0	0.0233766	-0.118894	-0.775381	-1.77185	-2.26087
AZC	Tmc1	Iso1	Rep2	3764	1523	1066	1231	5723	6750	4225	3680	3682	3071	2397	945	0	-0.0599789	-0.0597429	-0.138547	-0.246159	-0.650395
AZC	Tmc1	Iso2	Rep2	6223	2976	4463	5872	10974	6779	7095	5684	10269	8619	8823	6142	0	-0.0962983	0.160576	0.0845045	0.0946639	-0.0626426
AZC	Tmc1	Iso3	Rep2	5393	609	1713	476	174	21	7462	1549	5695	4386	9121	6760	0	-0.682804	-0.117362	-0.230787	0.0871872	-0.0429085
AZC	Tmc1	Iso4	Rep2	7787	3998	10500	7429	15809	19242	8335	1828	2220	771	356	80	0	-0.658929	-0.574553	-1.03385	-1.36946	-2.01782
37C	Tmc1	Iso1	Rep1	7831	1168	1823	922	4306	3333	9643	1215	1679	732	3577	2479	0	-0.899636	-0.759161	-1.1197	-0.430693	-0.589936
37C	Tmc1	Iso2	Rep1	6421	10396	8909	7868	12669	9894	7424	9841	7948	6131	9961	7115	0	0.122401	0.0296199	-0.0831066	0.127665	-0.0184631
37C	Tmc1	Iso3	Rep1	4842	3259	1911	2037	1222	874	6219	4430	2586	2482	1535	998	0	-0.147317	-0.381092	-0.398919	-0.607612	-0.79459
37C	Tmc1	Iso4	Rep1	3332	23917	14923	21281	17914	17600	3180	9736	3640	2686	1425	735	0	0.485953	0.0586743	-0.0733211	-0.348612	-0.63614
37C	Tmc1	Iso1	Rep2	6198	1787	403	341	701	3428	6518	1713	346	262	531	2322	0	-0.580357	-1.27504	-1.39581	-1.08902	-0.448252
37C	Tmc1	Iso2	Rep2	16086	8758	8940	5585	13883	14585	18828	9372	9316	5265	13935	13540	0	-0.302972	-0.305575	-0.553406	-0.130697	-0.143186
37C	Tmc1	Iso3	Rep2	18604	1127	2403	773	1209	654	25953	1321	3052	875	1301	668	0	-1.29328	-0.929603	-1.47218	-1.29991	-1.58941
37C	Tmc1	Iso4	Rep2	21252	12119	12584	11935	25377	10159	26121	6239	4051	2034	2697	552	0	-0.621875	-0.809428	-1.10864	-0.986109	-1.67505
YPD	Rpn4	Iso1	Rep1	8175	26632	31989	23603	41157	41114	5502	7029	7446	4847	7075	5966	0	0.106373	0.131402	-0.0550476	0.109206	0.0351627
YPD	Rpn4	Iso2	Rep1	6544	24155	36310	27405	23979	34247	3345	3745	4705	3030	2384	2805	0	0.0490557	0.148164	-0.0429535	-0.14709	-0.0764633
YPD	Rpn4	Iso3	Rep1	5587	33566	41887	36160	41397	31808	2108	4965	4502	3056	2992	1841	0	0.372049	0.329535	0.161283	0.152091	-0.0588168
YPD	Rpn4	Iso4	Rep1	3781	35454	31645	13916	30724	23300	1804	7799	5413	2108	4010	2492	0	0.635802	0.477201	0.0676341	0.346908	0.140312
YPD	Rpn4	Iso1	Rep2	10686	29385	24069	30247	38251	28640	5392	11915	8069	8613	9556	5875	0	0.344344	0.17507	0.203405	0.248526	0.037258
YPD	Rpn4	Iso2	Rep2	66	1623	3286	2047	3629	7051	1524	22996	29513	14998	22732	36960	0	1.17867	1.28703	0.993048	1.17365	1.38475
YPD	Rpn4	Iso3	Rep2	13765	27470	32696	38224	32595	24806	5559	8755	8423	8569	6020	3870	0	0.197259	0.18047	0.187933	0.0345998	-0.157286
YPD	Rpn4	Iso4	Rep2	12699	27622	28957	37258	26219	18291	3509	5709	4956	5474	3195	1959	0	0.211377	0.149948	0.193121	-0.0407125	-0.253149
DZA30	Rpn4	Iso1	Rep1	5639	25748	25212	32812	18391	32185	3671	945	181	121	45	12	0	-0.589353	-1.30711	-1.482	-1.91157	-2.4856
DZA30	Rpn4	Iso2	Rep1	4794	697	2822	1721	2072	3501	2544	24	19	12	1	3	0	-2.02531	-2.12676	-2.32634	-3.40552	-2.9284
DZA30	Rpn4	Iso3	Rep1	3093	24319	48875	26043	28408	22852	1161	886	292	131	37	29	0	-0.117398	-0.599449	-0.947561	-1.49663	-1.60243
DZA30	Rpn4	Iso4	Rep1	2019	3727	4721	1514	20213	7699	953	179	31	9	8	1	0	-0.72624	-1.48773	-2.02485	-2.076	-2.97909
DZA30	Rpn4	Iso1	Rep2	6129	28892	32501	20433	27181	27095	3148	1383	195	83	37	45	0	-0.357213	-1.208	-1.57896	-1.92983	-1.84482
DZA30	Rpn4	Iso2	Rep2	21	1009	3115	3415	3811	3689	1555	1978	586	139	13	9	0	0.104496	-0.423833	-1.04872	-2.07779	-2.23749
DZA30	Rpn4	Iso3	Rep2	8802	22065	26910	28727	18725	11258	3442	1419	274	89	46	52	0	-0.384828	-1.09906	-1.58742	-1.87405	-1.82081
DZA30	Rpn4	Iso4	Rep2	4481	3523	4609	3666	5298	1652	1187	138	29	6	0	0	0	-0.934572	-1.61205	-2.2963	#NUM!	#NUM!
DZA15	Rpn4	Iso1	Rep1	4962	34097	35021	19922	29169	32217	3176	1666	451	130	104	39	0	-0.280205	-0.847704	-1.38794	-1.48485	-1.91082
DZA15	Rpn4	Iso2	Rep1	6456	4728	3837	1377	11896	5259	3203	144	30	13	6	16	0	-1.34719	-2.02844	-2.39161	-2.72741	-2.30144
DZA15	Rpn4	Iso3	Rep1	4254	29020	32130	20592	35139	28686	1443	951	379	122	79	95	0	-0.181086	-0.580627	-1.07291	-1.26164	-1.18154
DZA15	Rpn4	Iso4	Rep1	1776	7818	3551	1123	4251	310	777	360	46	9	4	2	0	-0.334119	-1.22766	-1.93618	-2.28836	-2.58939
DZA15	Rpn4	Iso1	Rep2	5836	33926	54831	20105	32944	43485	2654	1896	636	97	226	142	0	-0.146063	-0.620444	-1.43713	-1.06979	-1.27161
DZA15	Rpn4	Iso2	Rep2	38	877	4150	1702	3444	3369	1248	1310	476	33	26	8	0	0.0210567	-0.418608	-1.5777	-1.68124	-2.19312
DZA15	Rpn4	Iso3	Rep2	12751	24861	29188	48153	25111	34446	4590	1515	418	163	91	92	0	-0.4814	-1.04064	-1.44963	-1.70277	-1.69802
DZA15	Rpn4	Iso4	Rep2	6421	5898	1947	1008	1338	124	1610	211	17	3	11	1	0	-0.882543	-1.97638	-2.7297	-2.16543	-3.20683
DMSO	Rpn4	Iso1	Rep1	7047	23566	33691	28890	29531	40755	4665	5407	6628	4891	4144	4769	0	0.0641047	0.152531	0.020546	-0.0514319	0.00957567
DMSO	Rpn4	Iso2	Rep1	6882	28704	33449	28042	27351	26765	3468	4107	3938	2867	2235	2039	0	0.0734456	0.0551966	-0.0826514	-0.190802	-0.230662
DMSO	Rpn4	Iso3	Rep1	3300	40078	41736	16219	31094	27591	1148	5398	3942	1271	1950	1481	0	0.672291	0.535775	0.0442037	0.230093	0.110613
DMSO	Rpn4	Iso4	Rep1	4486	28873	27505	43171	36386	24319	2055	5591	4227	5848	4296	2454	0	0.434678	0.31322	0.454196	0.320252	0.0770627
DMSO	Rpn4	Iso1	Rep2	10298	26007	22264	27653	27375	29322	5196	9504	6509	6977	5930	5110	0	0.262237	0.0978451	0.128	0.0573856	-0.00724824
DMSO	Rpn4	Iso2	Rep2	31	2566	3313	4477	3634	4792	1165	34072	27104	31215	22495	25418	0	1.46607	1.36671	1.42804	1.28576	1.33882
DMSO	Rpn4	Iso3	Rep2	15564	14399	24360	34338	20116	20214	6447	4085	6061	6941	3364	2645	0	-0.198166	-0.0268134	0.0320644	-0.282502	-0.386932
DMSO	Rpn4	Iso4	Rep2	14667	35273	29147	35549	40138	26551	3956	6762	4457	4724	4600	2608	0	0.232819	0.0517864	0.0770536	0.0655015	-0.180949
AZC	Rpn4	Iso1	Rep1	5031	1668	4441	1560	13645	14488	3312	81	47	17	12	29	0	-1.61161	-1.84799	-2.28964	-2.44091	-2.05769
AZC	Rpn4	Iso2	Rep1	5332	9021	10877	10790	11458	27464	2738	333	45	41	35	33	0	-0.914989	-1.78422	-1.82465	-1.89337	-1.91892
AZC	Rpn4	Iso3	Rep1	1740	4240	8738	2518	8480	4253	658	241	75	14	10	13	0	-0.436209	-0.943165	-1.6721	-1.81823	-1.70428
AZC	Rpn4	Iso4	Rep1	3264	9709	11841	11049	23068	19528	1642	494	93	33	49	110	0	-0.521646	-1.24689	-1.69686	-1.52518	-1.17398
AZC	Rpn4	Iso1	Rep2	3987	7093	5420	2519	7981	7211	1842	333	27	12	9	4	0	-0.742845	-1.83393	-2.18611	-2.31105	-2.66323
AZC	Rpn4	Iso2	Rep2	59	242	28	815	7989	12378	1820	388	1	13	31	30	0	-0.67124	-3.26007	-2.14613	-1.76871	-1.78295
AZC	Rpn4	Iso3	Rep2	6873	6695	4348	3418	4522	12963	2718	292	41	17	10	13	0	-0.968867	-1.82147	-2.2038	-2.43425	-2.32031
AZC	Rpn4	Iso4	Rep2	9344	10514	9280	7012	12947	17106	2478	365	166	712	4472	7255	0	-0.831808	-1.17399	-0.541621	0.2564	0.466536
37C	Rpn4	Iso1	Rep1	9957	3774	6707	5417	8772	14110	6587	683	641	369	275	314	0	-0.984267	-1.01183	-1.25166	-1.37935	-1.32176
37C	Rpn4	Iso2	Rep1	9919	15096	18219	14746	22946	23904	5296	1364	812	413	349	240	0	-0.589134	-0.814392	-1.108	-1.18112	-1.34374
37C	Rpn4	Iso3	Rep1	3433	9701	9909	5090	6060	8712	1099	871	406	153	77	72	0	-0.10098	-0.432472	-0.856306	-1.15451	-1.18367
37C	Rpn4	Iso4	Rep1	6001	23562	32340	24505	20158	17646	2841	3117	2261	1166	452	266	0	0.0402656	-0.0991707	-0.386773	-0.798333	-1.02859
37C	Rpn4	Iso1	Rep2	8389	6007	4751	10133	5065	6451	3974	1424	737	1036	279	268	0	-0.445718	-0.73176	-0.583868	-1.15362	-1.17109
37C	Rpn4	Iso2	Rep2	61	1773	4569	8668	18638	18305	2468	10438	9499	10052	10601	6726	0	0.626272	0.585333	0.609907	0.633002	0.435412
37C	Rpn4	Iso3	Rep2	15924	2583	12198	8927	9445	10711	6614	498	1313	652	379	277	0	-1.12323	-0.702199	-1.00622	-1.24182	-1.37798
37C	Rpn4	Iso4	Rep2	13525	13711	16916	14549	35325	26284	3746	1570	1305	715	888	472	0	-0.377668	-0.457957	-0.719262	-0.625155	-0.899626
YPD	Pre9	Iso1	Rep1	5257	11874	10713	14767	19865	19055	3245	2283	1068	746	661	398	0	-0.152709	-0.482643	-0.638476	-0.691013	-0.911332
YPD	Pre9	Iso2	Rep1	4752	5066	11265	5933	11585	10269	3175	1257	1736	592	770	445	0	-0.402408	-0.262194	-0.729422	-0.615253	-0.853384
YPD	Pre9	Iso3	Rep1	6359	23460	25950	9553	16263	13337	4099	7816	5789	1435	1644	992	0	0.280307	0.149926	-0.455826	-0.396776	-0.616166
YPD	Pre9	Iso4	Rep1	3776	5254	12057	9168	16321	8642	2638	1833	2511	1147	1245	444	0	-0.158112	-0.0214281	-0.361711	-0.326105	-0.773892
YPD	Pre9	Iso1	Rep2	8475	17819	14777	19105	11904	10077	2241	871	170	51	17	14	0	-0.410424	-1.11999	-1.64287	-2.11999	-2.20431
YPD	Pre9	Iso2	Rep2	4603	8281	11915	8180	8368	22485	2107	1647	1326	523	371	546	0	-0.106971	-0.201121	-0.605163	-0.754291	-0.586472
YPD	Pre9	Iso3	Rep2	13801	19493	18493	14569	20373	12911	7970	7124	4088	2082	2113	967	0	-0.0487344	-0.289947	-0.582978	-0.576559	-0.916032
YPD	Pre9	Iso4	Rep2	13845	2881	12595	10443	17668	9662	7761	728	1797	861	918	292	0	-1.02779	-0.63537	-0.954915	-0.927075	-1.42453
DZA30	Pre9	Iso1	Rep1	3921	13227	9866	5685	4434	4985	2529	4665	4367	3046	4278	8879	0	0.265903	0.237234	0.0807811	0.228292	0.545415
DZA30	Pre9	Iso2	Rep1	2624	3458	7353	2944	3655	2565	1735	1728	5671	2976	6832	8660	0	-0.00175574	0.51436	0.234333	0.595248	0.698218
DZA30	Pre9	Iso3	Rep1	2502	10701	11364	4448	4193	1124	1942	8289	11883	7823	16057	8776	0	0.630253	0.786677	0.605124	0.917415	0.655047
DZA30	Pre9	Iso4	Rep1	844	1704	1663	1623	80	359	636	1408	1702	2674	327	2733	0	0.345146	0.427502	0.623704	-0.288909	0.633183
DZA30	Pre9	Iso1	Rep2	3099	12169	9300	8051	14028	13754	1239	2752	1227	1048	1016	623	0	0.346577	-0.00422674	-0.07271	-0.0861776	-0.298583
DZA30	Pre9	Iso2	Rep2	4144	515	892	376	155	2640	2867	206	686	560	376	11150	0	-1.14356	-0.621104	-0.70924	-0.88224	0.589847
DZA30	Pre9	Iso3	Rep2	8523	5129	8473	4120	3360	1536	6063	4084	10870	7250	10845	11854	0	-0.171602	0.253542	0.0776504	0.252542	0.291177
DZA30	Pre9	Iso4	Rep2	3411	6782	5102	1610	116	1313	2329	4863	5238	2155	311	7053	0	0.319735	0.351996	-0.0337222	-0.874409	0.481204
DZA15	Pre9	Iso1	Rep1	4458	9895	8736	6511	8515	15936	2864	1946	1495	797	1001	1654	0	-0.16783	-0.282332	-0.555515	-0.456539	-0.238438
DZA15	Pre9	Iso2	Rep1	2246	9463	184	9817	2491	0	1453	1735	62	1806	496	0	0	0.0770339	-1.36987	0.0944521	-0.466784	#DIV/0!
DZA15	Pre9	Iso3	Rep1	3449	10707	26875	11009	7709	13224	2157	4628	9609	3772	3179	5511	0	0.331543	0.648828	0.242722	0.16844	0.40738
DZA15	Pre9	Iso4	Rep1	1208	4584	13075	3179	1769	126	774	1701	4338	1006	540	53	0	0.341963	0.748549	0.113857	-0.156347	-1.16447
DZA15	Pre9	Iso1	Rep2	8982	6792	10583	15871	21971	9233	2531	628	213	147	55	15	0	-0.605333	-1.07491	-1.23597	-1.66293	-2.2272
DZA15	Pre9	Iso2	Rep2	2604	1117	318	0	224	2827	1241	270	50	0	50	443	0	-0.662408	-1.3948	#DIV/0!	-1.3948	-0.447368
DZA15	Pre9	Iso3	Rep2	13878	10042	4595	10646	4980	9526	8393	4544	1772	3520	1785	4190	0	-0.266479	-0.675454	-0.377375	-0.672279	-0.301703
DZA15	Pre9	Iso4	Rep2	5029	3544	333	7696	154	6578	2858	1168	71	1316	25	1010	0	-0.388619	-1.6048	-0.336806	-2.05812	-0.451741
DMSO	Pre9	Iso1	Rep1	4365	8698	15811	10107	13968	19737	2622	1621	1444	572	453	396	0	-0.20885	-0.259065	-0.661237	-0.762534	-0.820938
DMSO	Pre9	Iso2	Rep1	3700	2935	9094	6844	14546	13712	2332	826	1459	574	879	548	0	-0.450748	-0.203673	-0.608817	-0.42374	-0.628948
DMSO	Pre9	Iso3	Rep1	4089	17557	33668	13587	10931	9561	2438	5944	7446	2020	1074	696	0	0.387045	0.484889	-0.0816823	-0.356029	-0.544424
DMSO	Pre9	Iso4	Rep1	3802	6214	12704	7170	14307	7072	2586	2166	2644	955	1117	357	0	-0.0769701	0.00963293	-0.432625	-0.364575	-0.85996
DMSO	Pre9	Iso1	Rep2	7892	11601	15339	10167	16521	22264	2303	590	161	34	24	8	0	-0.591442	-1.15547	-1.83082	-1.98208	-2.4592
DMSO	Pre9	Iso2	Rep2	4940	5295	15753	5897	10338	6964	2315	1147	1716	378	410	207	0	-0.304988	-0.130034	-0.787059	-0.751767	-1.04858
DMSO	Pre9	Iso3	Rep2	16569	9746	9649	10126	7410	24290	10134	3327	2200	1396	758	1726	0	-0.483728	-0.663358	-0.860895	-1.12611	-0.76874
DMSO	Pre9	Iso4	Rep2	8538	6457	8607	4681	10403	5784	5211	1631	1313	391	558	177	0	-0.504467	-0.598656	-1.12474	-0.970287	-1.46895
AZC	Pre9	Iso1	Rep1	4025	206	241	364	622	533	2429	45	9	3	6	3	0	-1.73222	-2.43119	-2.90831	-2.60728	-2.90831
AZC	Pre9	Iso2	Rep1	2966	2291	2515	3625	9454	10406	1963	324	60	36	17	19	0	-0.782375	-1.51477	-1.73662	-2.06247	-2.01417
AZC	Pre9	Iso3	Rep1	2773	533	2338	2105	4510	442	1786	104	80	6	1	0	0	-1.23485	-1.34879	-2.47373	-3.25188	#NUM!
AZC	Pre9	Iso4	Rep1	1643	2854	11422	4986	12187	9171	1043	171	52	11	13	14	0	-0.785288	-1.30228	-1.97689	-1.90434	-1.87216
AZC	Pre9	Iso1	Rep2	3648	1134	1356	1558	819	4498	1066	198	33	9	1	2	0	-0.731092	-1.50924	-2.07351	-3.02776	-2.72673
AZC	Pre9	Iso2	Rep2	5305	5888	5873	3986	6582	4998	2374	1059	177	49	52	32	0	-0.350585	-1.12751	-1.68528	-1.65948	-1.87033
AZC	Pre9	Iso3	Rep2	6096	1046	2037	2545	653	1414	3545	224	96	25	2	7	0	-1.19937	-1.56735	-2.15168	-3.24859	-2.70452
AZC	Pre9	Iso4	Rep2	7496	3016	8960	4698	8075	7127	3897	302	133	44	26	20	0	-1.11072	-1.46688	-1.94728	-2.17576	-2.2897
37C	Pre9	Iso1	Rep1	4888	2405	1907	3232	1968	2280	3089	326	30	7	2	1	0	-0.9766	-2.0127	-2.64472	-3.18879	-3.48982
37C	Pre9	Iso2	Rep1	5161	13466	10036	10718	9601	19458	3454	1928	159	30	3	15	0	-0.253215	-1.33693	-2.0612	-3.0612	-2.36223
37C	Pre9	Iso3	Rep1	4324	3655	2100	5172	1326	3274	2598	788	32	15	1	0	0	-0.518113	-1.90949	-2.23855	-3.41464	#NUM!
37C	Pre9	Iso4	Rep1	3207	8425	10780	10051	12840	9835	2131	1540	161	27	6	6	0	-0.141063	-1.12176	-1.89722	-2.55043	-2.55043
37C	Pre9	Iso1	Rep2	6051	3931	2692	938	2510	1491	1490	179	15	4	1	0	0	-0.920333	-1.9971	-2.57113	-3.17319	#NUM!
37C	Pre9	Iso2	Rep2	8853	9773	11510	8614	14921	9499	3960	1248	200	23	3	17	0	-0.501481	-1.29667	-2.23597	-3.12057	-2.36725
37C	Pre9	Iso3	Rep2	13552	733	2489	3787	1036	1590	7640	114	56	19	2	1	0	-1.82619	-2.13491	-2.60434	-3.58206	-3.88309
37C	Pre9	Iso4	Rep2	13164	7184	10325	11627	13449	11394	7229	1135	192	42	3	2	0	-0.804082	-1.57578	-2.23583	-3.38196	-3.55805
YPD	parent	Iso1	Rep1	10325	22466	16071	13980	16246	15333	17272	36968	27367	26091	32302	33750	0	0.330483	0.199885	0.179148	0.271887	0.290931
YPD	parent	Iso2	Rep1	7821	18222	23709	10156	13391	10909	13698	29827	41287	18772	27214	24389	0	0.337952	0.479156	0.136853	0.298135	0.250537
YPD	parent	Iso3	Rep1	5819	19556	23138	14922	11681	13582	9199	32542	40004	27498	23773	30107	0	0.548704	0.638363	0.47556	0.412343	0.514927
YPD	parent	Iso4	Rep1	4625	12022	12452	8486	13704	11494	7838	22242	24780	17547	31043	28366	0	0.452969	0.499896	0.349998	0.597758	0.558593
YPD	parent	Iso1	Rep2	8464	19490	17101	17572	21136	26836	10070	20281	17349	18452	23887	32852	0	0.30406	0.236245	0.263014	0.375132	0.513532
YPD	parent	Iso2	Rep2	8601	28273	20376	19122	17863	19439	10541	28246	20080	18971	19305	22220	0	0.428075	0.279882	0.255208	0.262788	0.323862
YPD	parent	Iso3	Rep2	16874	22557	22869	22233	20294	18072	20916	23841	24709	24346	23931	22935	0	0.0568458	0.0723765	0.065949	0.0584822	0.0400201
YPD	parent	Iso4	Rep2	21203	18572	18149	21767	19198	9533	30675	22759	21302	26903	25011	13458	0	-0.129631	-0.158364	-0.0569839	-0.0886535	-0.357804
DZA30	parent	Iso1	Rep1	9024	16070	6612	4838	4127	4087	15414	28391	16211	14409	15976	18205	0	0.265265	0.0218945	-0.0292815	0.0155527	0.0722753
DZA30	parent	Iso2	Rep1	6689	1521	2152	1405	1427	1317	11414	2777	5387	4579	5713	6641	0	-0.613862	-0.326091	-0.396667	-0.300574	-0.235204
DZA30	parent	Iso3	Rep1	4090	10011	8870	4668	4325	3444	6752	19849	23305	16162	18384	17628	0	0.468306	0.538017	0.379063	0.435008	0.416771
DZA30	parent	Iso4	Rep1	2477	3021	2806	1477	1406	838	4506	6619	7831	5575	6886	4560	0	0.167001	0.240026	0.0924537	0.184176	0.00517366
DZA30	parent	Iso1	Rep2	5802	15872	10619	5640	6301	11276	7862	23347	20806	14165	19872	40880	0	0.472698	0.422656	0.255684	0.402709	0.715978
DZA30	parent	Iso2	Rep2	8181	6548	5033	1760	3136	1212	10664	8417	8908	3981	8860	4090	0	-0.102763	-0.0781399	-0.427928	-0.0804864	-0.416197
DZA30	parent	Iso3	Rep2	14259	12006	6939	11433	5917	4006	20468	19288	14811	30055	19056	15331	0	-0.0257882	-0.140491	0.166841	-0.0310437	-0.125505
DZA30	parent	Iso4	Rep2	5421	1023	2779	4997	1366	1824	8529	1694	6617	14458	5117	7528	0	-0.701985	-0.110237	0.22921	-0.221883	-0.0542185
DZA15	parent	Iso1	Rep1	9489	19970	12507	11164	7464	9306	16188	35039	25657	25942	20299	28506	0	0.335359	0.200013	0.20481	0.0982814	0.245743
DZA15	parent	Iso2	Rep1	6707	4435	1586	1670	1269	2084	11842	7985	3452	4306	3868	6949	0	-0.17115	-0.535354	-0.439351	-0.485939	-0.231503
DZA15	parent	Iso3	Rep1	5110	12665	10428	12862	10100	5267	8004	23971	22955	33539	30799	18528	0	0.476379	0.45757	0.622243	0.58523	0.364521
DZA15	parent	Iso4	Rep1	5031	2215	4298	2566	536	1181	9335	4482	10179	7148	1678	4294	0	-0.318642	0.0375908	-0.11593	-0.745322	-0.337252
DZA15	parent	Iso1	Rep2	5589	16040	18199	10958	14899	15619	7007	18940	26859	19056	30559	35350	0	0.431848	0.583558	0.4345	0.639607	0.702857
DZA15	parent	Iso2	Rep2	4515	2744	689	2480	3582	303	5081	3157	1040	4239	6981	637	0	-0.206675	-0.688916	-0.0786858	0.137968	-0.90181
DZA15	parent	Iso3	Rep2	15388	13256	12836	12806	9531	7549	20840	18000	20418	23530	20474	19084	0	-0.0636252	-0.00888452	0.0527242	-0.00769502	-0.0382283
DZA15	parent	Iso4	Rep2	8049	796	2606	1890	1120	522	11066	1236	4780	3799	2694	1439	0	-0.951972	-0.364563	-0.464321	-0.613593	-0.88593
DMSO	parent	Iso1	Rep1	7342	21312	18040	13491	14061	14572	12824	34243	30704	23926	27775	30118	0	0.426548	0.379171	0.270847	0.335631	0.370803
DMSO	parent	Iso2	Rep1	8740	14727	14338	11570	11666	11833	15430	24799	24907	21167	23351	25374	0	0.206068	0.207955	0.137293	0.17994	0.216023
DMSO	parent	Iso3	Rep1	4924	17363	16706	9256	16108	13815	8256	28618	29627	17251	34336	31210	0	0.53987	0.554918	0.320045	0.61898	0.577524
DMSO	parent	Iso4	Rep1	6310	19968	18721	11595	11377	11690	11003	36886	36282	24019	25814	28123	0	0.52535	0.51818	0.339044	0.370344	0.407551
DMSO	parent	Iso1	Rep2	10295	24510	20753	20567	18562	24073	12510	25268	20958	21248	21097	28806	0	0.305314	0.224093	0.230061	0.226963	0.362226
DMSO	parent	Iso2	Rep2	8758	27982	22498	14576	11247	15316	10357	28913	22061	14692	12310	17851	0	0.445859	0.328391	0.151847	0.0750241	0.236429
DMSO	parent	Iso3	Rep2	14748	20339	17748	21099	17608	11748	18797	22430	18773	23150	20571	15484	0	0.0767407	-0.000554861	0.0904625	0.0391669	-0.0842054
DMSO	parent	Iso4	Rep2	13682	21020	15207	19555	20096	10740	19824	25079	18025	23477	26565	15088	0	0.102119	-0.041316	0.0734513	0.127119	-0.11856
AZC	parent	Iso1	Rep1	7893	1747	1525	1174	704	270	13690	5083	7506	8951	12186	22160	0	-0.430283	-0.260995	-0.184532	-0.0505423	0.209166
AZC	parent	Iso2	Rep1	7928	2607	2959	1730	2568	3621	14359	8237	15577	14224	22383	29228	0	-0.241355	0.0353596	-0.00410245	0.192794	0.308675
AZC	parent	Iso3	Rep1	2802	2491	2291	1368	5075	12024	4726	8831	12559	8944	6713	5525	0	0.271516	0.424461	0.277038	0.152423	0.0678386
AZC	parent	Iso4	Rep1	5250	3493	2537	1369	3825	4896	9459	12717	15006	12162	23672	20481	0	0.128539	0.20042	0.10916	0.39839	0.335506
AZC	parent	Iso1	Rep2	5305	3069	1849	1143	4539	10912	6897	9851	9772	7694	13897	12304	0	0.15482	0.151323	0.047492	0.304261	0.251386
AZC	parent	Iso2	Rep2	6185	5039	2352	2247	2378	2986	7707	13359	10802	16968	23279	30374	0	0.238889	0.146619	0.342745	0.480079	0.595617
AZC	parent	Iso3	Rep2	12323	2923	2206	1670	605	179	17213	9123	12403	15174	11970	12232	0	-0.275719	-0.14233	-0.0547565	-0.157762	-0.148359
AZC	parent	Iso4	Rep2	9668	3194	3545	2155	9315	25598	15177	11672	20918	14327	10978	7290	0	-0.114041	0.139334	-0.0250307	-0.140663	-0.318458
37C	parent	Iso1	Rep1	9945	3651	3741	6136	6268	5561	17052	6095	6979	12611	14611	13656	0	-0.446802	-0.387982	-0.131026	-0.0670954	-0.0964518
37C	parent	Iso2	Rep1	11545	10480	6679	5607	12905	7849	19396	17818	12365	11330	30724	19604	0	-0.0368532	-0.195518	-0.233482	0.199766	0.00463252
37C	parent	Iso3	Rep1	5195	3761	7315	3258	5911	3443	8144	6368	13733	6394	13945	8579	0	-0.106835	0.226928	-0.105065	0.233581	0.0225989
37C	parent	Iso4	Rep1	6293	9379	9172	6033	6330	8056	10799	17606	19548	14444	17264	22552	0	0.212277	0.257719	0.126304	0.203758	0.319802
37C	parent	Iso1	Rep2	10851	5775	3903	8675	8037	5390	12610	7165	4663	11280	11518	8379	0	-0.245499	-0.43205	-0.048406	-0.039338	-0.177523
37C	parent	Iso2	Rep2	12914	16726	8967	10188	8602	9549	15981	20043	10698	12802	12165	14255	0	0.0983588	-0.174301	-0.0963261	-0.118492	-0.0496367
37C	parent	Iso3	Rep2	19805	3693	10450	5902	5605	3888	23646	4626	12824	7275	8311	5667	0	-0.708552	-0.265734	-0.511925	-0.454104	-0.620404
37C	parent	Iso4	Rep2	15983	11370	8509	8154	10562	8941	22065	15080	11194	11673	17593	14899	0	-0.165303	-0.294719	-0.276521	-0.098364	-0.170547
YPD	Hsp42	Iso1	Rep1	6837	1571	8089	5629	2899	4142	7311	1285	6651	4989	2742	4220	0	-0.755074	-0.0410898	-0.165963	-0.425909	-0.238664
YPD	Hsp42	Iso2	Rep1	5684	4107	4825	2034	1848	7679	5979	3403	4248	1769	1863	7750	0	-0.244767	-0.148444	-0.528901	-0.506416	0.112673
YPD	Hsp42	Iso3	Rep1	9504	1147	13786	3342	2508	2471	12553	1487	16958	4107	3344	3442	0	-0.926437	0.130627	-0.485223	-0.574481	-0.561937
YPD	Hsp42	Iso4	Rep1	3360	2610	3992	733	1659	4090	3562	2833	4164	877	2132	5594	0	-0.0994473	0.0678168	-0.608694	-0.222907	0.196029
YPD	Hsp42	Iso1	Rep2	19787	6445	10514	4166	1990	4817	19253	4775	7468	3012	1522	3997	0	-0.605525	-0.411294	-0.805643	-1.10208	-0.682764
YPD	Hsp42	Iso2	Rep2	7048	5040	6156	2033	2460	12716	7194	3725	4225	1466	1710	9456	0	-0.285844	-0.231144	-0.690836	-0.623974	0.118737
YPD	Hsp42	Iso3	Rep2	22903	3115	10241	6161	4387	3469	32546	4425	15374	9662	7051	5653	0	-0.866584	-0.325711	-0.527431	-0.664247	-0.760219
YPD	Hsp42	Iso4	Rep2	14394	1382	4079	1438	3159	1629	14189	1282	3846	1507	3538	2184	0	-1.04406	-0.566943	-0.973839	-0.603194	-0.812699
DZA30	Hsp42	Iso1	Rep1	3856	2085	8347	1601	2192	1882	4158	2003	11350	2531	4782	4511	0	-0.317204	0.436111	-0.215592	0.0607251	0.0353883
DZA30	Hsp42	Iso2	Rep1	2536	3311	1184	2687	261	3335	3026	3499	1484	3827	386	5795	0	0.063075	-0.309435	0.10199	-0.894282	0.282185
DZA30	Hsp42	Iso3	Rep1	4685	4734	4971	2556	3722	1412	6105	6796	8930	5718	10988	4995	0	0.0465677	0.165166	-0.0284415	0.255233	-0.0871502
DZA30	Hsp42	Iso4	Rep1	2510	1324	2188	73	3432	78	2985	1882	3817	201	9900	327	0	-0.200325	0.106778	-1.17175	0.520691	-0.960397
DZA30	Hsp42	Iso1	Rep2	12167	5219	5951	3133	7483	2142	12125	5431	7920	5422	14910	4775	0	-0.348802	-0.184957	-0.349522	0.0897959	-0.404708
DZA30	Hsp42	Iso2	Rep2	19953	454	636	2795	830	0	22059	410	752	4098	1280	0	0	-1.7308	-1.46737	-0.731014	-1.23638	#DIV/0!
DZA30	Hsp42	Iso3	Rep2	10163	2243	2656	2167	909	2052	16723	4045	6584	6612	3311	9401	0	-0.616396	-0.404824	-0.402981	-0.703355	-0.25014
DZA30	Hsp42	Iso4	Rep2	5197	7886	3590	328	279	359	5952	9938	6506	688	750	1090	0	0.222636	0.0386511	-0.937074	-0.899602	-0.737236
DZA15	Hsp42	Iso1	Rep1	6125	2376	3395	1615	1301	3023	6599	2066	3806	2022	2013	5112	0	-0.504348	-0.239009	-0.513697	-0.515634	-0.110887
DZA15	Hsp42	Iso2	Rep1	3296	14120	4343	2510	12	12	3926	11577	4564	2771	18	16	0	0.469646	0.0653953	-0.151314	-2.33868	-2.38983
DZA15	Hsp42	Iso3	Rep1	4002	11422	7027	2778	726	1167	4963	15865	10937	5169	1515	3038	0	0.504696	0.343154	0.0176623	-0.515332	-0.213157
DZA15	Hsp42	Iso4	Rep1	3646	480	7778	1926	2656	1921	4303	550	10795	3305	5204	4308	0	-0.893409	0.399451	-0.1146	0.0825659	0.000504349
DZA15	Hsp42	Iso1	Rep2	6754	3934	8480	6062	5100	1953	6652	3322	8953	7600	7567	3160	0	-0.301553	0.129016	0.0578614	0.0559715	-0.323265
DZA15	Hsp42	Iso2	Rep2	8001	1725	7606	75	6578	10638	8501	1388	7867	105	8254	14755	0	-0.787081	-0.0336609	-1.90828	-0.0128056	0.239469
DZA15	Hsp42	Iso3	Rep2	21240	1714	3288	446	4145	2388	32494	2719	6738	950	11154	7443	0	-1.07739	-0.683272	-1.53408	-0.464373	-0.640055
DZA15	Hsp42	Iso4	Rep2	10025	3399	579	104	3301	0	10201	3511	740	147	5927	0	0	-0.463212	-1.13941	-1.84133	-0.235808	#DIV/0!
DMSO	Hsp42	Iso1	Rep1	5851	4329	8345	4102	4514	9541	6109	3704	7081	3740	4454	10487	0	-0.217299	0.0641245	-0.213099	-0.13722	0.234681
DMSO	Hsp42	Iso2	Rep1	3427	817	2321	1777	1852	2454	3814	701	2038	1585	1665	2454	0	-0.735663	-0.272177	-0.381351	-0.359966	-0.191506
DMSO	Hsp42	Iso3	Rep1	8005	655	12074	7842	2565	4802	9854	769	13979	9913	3448	6684	0	-1.10769	0.151864	0.00259255	-0.456045	-0.168576
DMSO	Hsp42	Iso4	Rep1	3358	4093	8752	4091	3044	2134	3855	4250	9365	4604	3826	2927	0	0.0423645	0.385483	0.0771109	-0.00327942	-0.119602
DMSO	Hsp42	Iso1	Rep2	7300	3343	9205	4923	2647	9095	7142	2678	6723	3697	2301	7792	0	-0.426009	-0.0262567	-0.28597	-0.491903	0.0378291
DMSO	Hsp42	Iso2	Rep2	7706	2099	3717	1114	1465	8555	7754	1691	2665	764	1055	5734	0	-0.661382	-0.463829	-1.00643	-0.866273	-0.131068
DMSO	Hsp42	Iso3	Rep2	14978	172	7786	5773	2351	2572	22531	268	11918	9448	4043	4370	0	-1.92465	-0.276577	-0.377441	-0.746077	-0.712299
DMSO	Hsp42	Iso4	Rep2	22266	298	2285	676	394	853	21482	359	2172	809	478	1054	0	-1.77698	-0.995215	-1.42413	-1.65265	-1.30923
AZC	Hsp42	Iso1	Rep1	4223	21	600	87	963	42	4634	41	1726	321	2940	113	0	-2.05317	-0.428915	-1.15945	-0.197609	-1.61288
AZC	Hsp42	Iso2	Rep1	3214	351	613	340	209	229	3896	496	1264	977	1476	3839	0	-0.895137	-0.488872	-0.600724	-0.421533	-0.00640084
AZC	Hsp42	Iso3	Rep1	3977	369	1139	149	39	71	5021	833	3858	797	235	178	0	-0.780145	-0.114428	-0.799332	-1.32972	-1.45037
AZC	Hsp42	Iso4	Rep1	2104	274	1331	1955	438	247	2480	648	5819	10034	959	448	0	-0.582877	0.370397	0.607022	-0.412633	-0.743174
AZC	Hsp42	Iso1	Rep2	3807	419	697	308	642	2050	4091	663	1814	1237	2780	12016	0	-0.790316	-0.353192	-0.51946	-0.167785	0.46793
AZC	Hsp42	Iso2	Rep2	4964	724	1418	357	94	20	5216	1010	2818	1764	3281	2053	0	-0.713016	-0.267397	-0.470839	-0.201331	-0.404949
AZC	Hsp42	Iso3	Rep2	11898	92	708	63	27	0	18675	224	2864	499	768	252	0	-1.92101	-0.814288	-1.57316	-1.3859	#DIV/0!
AZC	Hsp42	Iso4	Rep2	8595	468	576	732	2291	3792	8867	1119	2181	1124	634	742	0	-0.898947	-0.609121	-0.89701	-1.14569	-1.07737
37C	Hsp42	Iso1	Rep1	6103	2142	2772	195	1086	289	6581	2063	2722	218	1350	362	0	-0.503793	-0.383404	-1.47984	-0.687958	-1.25958
37C	Hsp42	Iso2	Rep1	5351	1286	3806	1407	1591	1426	5934	1268	3653	1545	1970	1690	0	-0.670228	-0.210698	-0.584419	-0.478881	-0.545461
37C	Hsp42	Iso3	Rep1	8626	935	1848	237	527	133	10860	1102	2398	301	923	239	0	-0.993648	-0.655981	-1.55726	-1.07063	-1.65743
37C	Hsp42	Iso4	Rep1	5204	2069	2519	818	763	707	5708	2488	3130	1123	1138	1162	0	-0.360634	-0.26094	-0.706104	-0.700342	-0.691278
37C	Hsp42	Iso1	Rep2	11691	1266	2199	402	455	661	11035	1053	1981	389	487	797	0	-1.02034	-0.745888	-1.45282	-1.35524	-1.14131
37C	Hsp42	Iso2	Rep2	7762	1600	1008	4355	967	521	7108	1334	885	3897	944	589	0	-0.726592	-0.904804	-0.261017	-0.876775	-1.08163
37C	Hsp42	Iso3	Rep2	21807	280	967	568	354	749	31141	378	1535	896	658	1603	0	-1.91584	-1.30722	-1.54102	-1.67511	-1.2884
37C	Hsp42	Iso4	Rep2	12864	570	2305	1200	1348	503	11884	535	2463	1462	1979	706	0	-1.34661	-0.683498	-0.910015	-0.778517	-1.22616
YPD	Hsp12	Iso1	Rep1	9015	14385	14398	4684	5605	7940	9644	12050	12261	4270	5308	8689	0	0.0967298	0.104269	-0.353829	-0.259326	-0.0452874
YPD	Hsp12	Iso2	Rep1	4663	756	6054	5869	3515	1194	5083	574	5608	5546	3715	1443	0	-0.947208	0.0426879	0.0378598	-0.136161	-0.546854
YPD	Hsp12	Iso3	Rep1	21175	4801	28406	8309	10690	2637	26757	5770	35501	11565	15756	4116	0	-0.666262	0.122803	-0.364292	-0.229991	-0.812962
YPD	Hsp12	Iso4	Rep1	5371	3958	6248	5549	909	13211	5057	2874	4219	3881	677	9626	0	-0.245406	-0.0786834	-0.114949	-0.873304	0.279553
YPD	Hsp12	Iso1	Rep2	36786	3839	26437	6317	10087	17754	38412	3087	20876	5022	9006	16683	0	-1.09493	-0.26482	-0.88359	-0.629935	-0.362193
YPD	Hsp12	Iso2	Rep2	6097	1518	19248	1751	1026	6991	6054	896	12711	1192	810	5232	0	-0.829734	0.322137	-0.705766	-0.873557	-0.0633747
YPD	Hsp12	Iso3	Rep2	37716	10649	17686	14542	8601	15264	52008	14821	26418	23644	14785	27614	0	-0.545193	-0.29417	-0.342349	-0.546249	-0.274941
YPD	Hsp12	Iso4	Rep2	10873	3939	11023	10529	307	3477	9755	2997	8293	8408	253	3012	0	-0.512541	-0.0705156	-0.0645346	-1.58611	-0.510372
DZA30	Hsp12	Iso1	Rep1	4545	3350	6291	3903	2302	1713	5265	3410	8829	6710	4852	4426	0	-0.188644	0.224513	0.105324	-0.0354776	-0.075387
DZA30	Hsp12	Iso2	Rep1	2690	753	5229	2698	4490	2635	3102	738	8075	4823	10311	7331	0	-0.623585	0.415501	0.191675	0.521659	0.373521
DZA30	Hsp12	Iso3	Rep1	7862	3505	11793	4111	1080	1351	9801	5021	22121	10219	3417	5188	0	-0.29048	0.353534	0.018138	-0.457625	-0.27627
DZA30	Hsp12	Iso4	Rep1	2677	1366	2663	129	2781	195	2920	1512	3511	236	6345	549	0	-0.285831	0.080048	-1.09247	0.337049	-0.725811
DZA30	Hsp12	Iso1	Rep2	10201	4940	9929	1843	1945	953	10059	5392	15448	3590	4891	2903	0	-0.270805	0.186317	-0.44746	-0.313157	-0.539708
DZA30	Hsp12	Iso2	Rep2	5437	3256	8115	4338	0	2326	6250	3379	12374	8071	0	6553	0	-0.267092	0.29663	0.111047	#DIV/0!	0.0205602
DZA30	Hsp12	Iso3	Rep2	18535	2205	6598	4885	1844	1792	26738	4136	17817	16894	8374	9524	0	-0.810548	-0.176294	-0.199396	-0.504196	-0.44831
DZA30	Hsp12	Iso4	Rep2	13263	4825	4745	844	3562	556	13212	5299	6879	1510	7904	1486	0	-0.396775	-0.283443	-0.941992	-0.223122	-0.94895
DZA15	Hsp12	Iso1	Rep1	5817	8290	7537	5364	1888	3511	6391	7643	8691	7104	3010	6288	0	0.077695	0.133501	0.0459341	-0.327002	-0.00705628
DZA15	Hsp12	Iso2	Rep1	4797	10700	1174	0	5024	340	5410	9638	1426	0	8890	722	0	0.25079	-0.579078	#DIV/0!	0.215704	-0.87466
DZA15	Hsp12	Iso3	Rep1	11185	5754	10717	2923	5246	1601	13893	7883	17328	5519	11900	4239	0	-0.246105	0.0959524	-0.400936	-0.0672491	-0.515533
DZA15	Hsp12	Iso4	Rep1	3914	368	5198	411	8588	176	4024	267	5009	434	11622	253	0	-1.17815	0.0950931	-0.967168	0.460623	-1.20154
DZA15	Hsp12	Iso1	Rep2	10991	3534	7362	10272	2768	1426	11175	3707	9467	15246	5031	3011	0	-0.479225	-0.0720352	0.134908	-0.346593	-0.569537
DZA15	Hsp12	Iso2	Rep2	9497	147	2586	366	466	5597	10492	98	2633	458	636	9900	0	-2.02963	-0.600407	-1.35999	-1.2174	-0.0252231
DZA15	Hsp12	Iso3	Rep2	14790	1165	8175	5349	3223	2666	21249	2150	17905	13757	9947	9538	0	-0.9949	-0.0743642	-0.188815	-0.329646	-0.347881
DZA15	Hsp12	Iso4	Rep2	14364	4158	11756	1268	276	876	14157	3781	13326	1548	376	1390	0	-0.573365	-0.0262714	-0.9612	-1.57578	-1.00796
DMSO	Hsp12	Iso1	Rep1	6983	5131	15403	5909	2522	6843	7375	4429	13068	5238	2510	7513	0	-0.221456	0.248447	-0.148597	-0.468088	0.00805136
DMSO	Hsp12	Iso2	Rep1	5099	1735	5367	1375	3732	1069	5588	1379	4952	1232	4045	1217	0	-0.607692	-0.0524758	-0.656646	-0.140338	-0.661966
DMSO	Hsp12	Iso3	Rep1	7034	3383	17698	11666	5883	1285	9017	4362	22129	15387	8381	1885	0	-0.315376	0.3899	0.232092	-0.0317662	-0.679751
DMSO	Hsp12	Iso4	Rep1	5107	1231	9705	3804	5804	1608	5148	954	6686	2697	4200	1251	0	-0.73209	0.113528	-0.280758	-0.0883892	-0.614381
DMSO	Hsp12	Iso1	Rep2	23649	2294	21292	6350	6154	12714	23469	1779	16467	5014	5319	11627	0	-1.12032	-0.15388	-0.67031	-0.644665	-0.305027
DMSO	Hsp12	Iso2	Rep2	10060	2771	11076	2543	271	1980	10091	1904	7004	1781	229	1588	0	-0.724267	-0.158588	-0.75327	-1.6441	-0.803084
DMSO	Hsp12	Iso3	Rep2	37716	4813	12471	6558	6818	10069	60454	7192	19206	12148	12074	18628	0	-0.924575	-0.497988	-0.69692	-0.699574	-0.511259
DMSO	Hsp12	Iso4	Rep2	20525	2416	10720	3534	11093	4271	17460	1755	7527	2707	8725	3414	0	-0.997767	-0.365422	-0.809556	-0.301279	-0.708781
AZC	Hsp12	Iso1	Rep1	3761	642	1134	201	95	82	4281	1321	3199	770	875	1341	0	-0.510642	-0.126531	-0.745055	-0.689537	-0.504116
AZC	Hsp12	Iso2	Rep1	3300	647	823	551	101	72	3794	1197	2871	4698	2413	1519	0	-0.501003	-0.121064	0.0928157	-0.19654	-0.39754
AZC	Hsp12	Iso3	Rep1	13178	1890	1794	187	312	37	17279	4189	5777	883	1524	181	0	-0.615408	-0.475816	-1.29156	-1.05453	-1.97984
AZC	Hsp12	Iso4	Rep1	4563	651	2218	258	272	397	4449	906	4744	1002	1627	1729	0	-0.691134	0.0278823	-0.647395	-0.436875	-0.410467
AZC	Hsp12	Iso1	Rep2	7332	1271	2388	1019	159	2370	8026	2933	8819	4063	208	3104	0	-0.437187	0.0409202	-0.295652	-1.58644	-0.412577
AZC	Hsp12	Iso2	Rep2	4280	1885	1780	1799	1424	1337	4375	2908	3783	1993	162	32	0	-0.177384	-0.0631417	-0.341471	-1.43146	-2.13583
AZC	Hsp12	Iso3	Rep2	16784	400	2807	546	77	166	23315	991	12592	4589	1337	3336	0	-1.37156	-0.267541	-0.705917	-1.2415	-0.844409
AZC	Hsp12	Iso4	Rep2	7900	1122	2902	501	84	12	7405	1533	6272	3680	5115	5032	0	-0.683983	-0.072119	-0.303677	-0.160679	-0.167784
37C	Hsp12	Iso1	Rep1	5553	1280	4330	539	839	123	6306	1130	4138	568	1061	190	0	-0.746676	-0.182963	-1.04541	-0.774039	-1.521
37C	Hsp12	Iso2	Rep1	3593	8477	4101	961	794	1274	4337	8582	4315	1037	1050	1838	0	0.296399	-0.00220862	-0.621411	-0.616	-0.372844
37C	Hsp12	Iso3	Rep1	5873	1688	3969	1451	158	715	7277	2002	5233	2076	250	1316	0	-0.560488	-0.143202	-0.544725	-1.46401	-0.742696
37C	Hsp12	Iso4	Rep1	5671	3688	7097	2574	772	1760	5479	3341	6405	2485	880	1904	0	-0.214825	0.0678178	-0.343375	-0.794219	-0.459034
37C	Hsp12	Iso1	Rep2	9451	1754	7346	1841	463	742	9955	1393	7203	1919	548	969	0	-0.85409	-0.140528	-0.714966	-1.25926	-1.01172
37C	Hsp12	Iso2	Rep2	10594	1871	1786	2562	1213	491	11128	1493	1519	2372	1296	494	0	-0.872357	-0.864859	-0.671302	-0.933812	-1.35269
37C	Hsp12	Iso3	Rep2	27473	1118	3964	1392	1144	297	38435	1585	6160	2393	2383	622	0	-1.3847	-0.795146	-1.20578	-1.2076	-1.79094
37C	Hsp12	Iso4	Rep2	20131	858	6665	3227	2429	1227	17783	630	5654	2954	2533	1468	0	-1.45066	-0.497649	-0.779595	-0.84637	-1.08328
YPD	Hsp104	Iso1	Rep1	5562	13618	15208	12002	13684	19003	6141	10937	11178	9170	10601	15936	0	0.250659	0.260125	0.17413	0.237108	0.41414
YPD	Hsp104	Iso2	Rep1	3757	7293	7245	10108	6241	8094	6117	10975	11271	16770	11655	15806	0	0.253866	0.265424	0.437995	0.279974	0.412283
YPD	Hsp104	Iso3	Rep1	3687	16662	19253	14655	15779	8897	3801	14542	16305	12919	14827	8776	0	0.582726	0.632423	0.531331	0.591155	0.363399
YPD	Hsp104	Iso4	Rep1	3003	12298	13563	11751	11121	16259	2787	8015	7276	5190	4426	5418	0	0.458767	0.416756	0.27003	0.200874	0.288702
YPD	Hsp104	Iso1	Rep2	8161	21752	11347	12451	12091	11850	9969	23532	12670	14096	15086	15647	0	0.373007	0.104125	0.150444	0.179923	0.195779
YPD	Hsp104	Iso2	Rep2	4250	9893	13352	8193	9086	12561	4577	10039	12506	8129	9692	14032	0	0.34111	0.436538	0.249456	0.325832	0.486539
YPD	Hsp104	Iso3	Rep2	14208	12293	17278	16857	18665	11259	14329	10431	14158	14083	16200	10735	0	-0.13789	-0.00521397	-0.0075207	0.0532991	-0.125414
YPD	Hsp104	Iso4	Rep2	8664	9327	13751	16195	25788	10345	8419	6336	6980	6380	8969	3253	0	-0.123445	-0.0814051	-0.12044	0.0274835	-0.412976
DZA30	Hsp104	Iso1	Rep1	3072	6142	4953	8024	5461	5622	3577	5733	6322	12265	11029	12597	0	0.204863	0.247336	0.535149	0.489017	0.546748
DZA30	Hsp104	Iso2	Rep1	3352	2610	291	2263	0	121	5642	4155	595	5986	0	470	0	-0.132862	-0.976916	0.0257036	#DIV/0!	-1.07934
DZA30	Hsp104	Iso3	Rep1	2920	7594	14254	5153	4382	3358	3063	8316	18713	8551	9047	8349	0	0.433767	0.785996	0.44587	0.470358	0.435487
DZA30	Hsp104	Iso4	Rep1	942	1171	681	517	993	577	952	911	352	268	407	199	0	-0.0191186	-0.432094	-0.550502	-0.369043	-0.679784
DZA30	Hsp104	Iso1	Rep2	4484	7912	8445	4148	5137	4576	5473	10322	15094	9139	14226	15023	0	0.275538	0.440579	0.222673	0.414857	0.438531
DZA30	Hsp104	Iso2	Rep2	2864	2482	420	1325	102	3922	3203	2663	675	2699	206	11864	0	-0.0801858	-0.676253	-0.0743541	-1.19169	0.568674
DZA30	Hsp104	Iso3	Rep2	8169	6721	5789	6661	5036	4035	9310	8422	9335	12814	12176	11295	0	-0.0435344	0.00116464	0.138735	0.116555	0.0839366
DZA30	Hsp104	Iso4	Rep2	3994	1595	750	284	4464	7212	4038	1300	539	152	2710	4102	0	-0.492223	-0.874578	-1.42432	-0.173197	0.00682934
DZA15	Hsp104	Iso1	Rep1	5188	6946	9218	8483	6242	9293	5978	5524	9335	9644	8350	14329	0	-0.0343022	0.193558	0.207701	0.145131	0.37966
DZA15	Hsp104	Iso2	Rep1	2769	7201	941	2656	470	3523	4915	10516	1854	5829	1330	10002	0	0.330327	-0.423414	0.0740705	-0.567672	0.308563
DZA15	Hsp104	Iso3	Rep1	2772	9001	16027	7035	6677	7379	2633	8674	18230	8924	10184	12646	0	0.517769	0.840336	0.530109	0.587468	0.681502
DZA15	Hsp104	Iso4	Rep1	1505	3589	0	4722	2135	4544	1500	1774	0	1456	541	876	0	0.0728624	#DIV/0!	-0.0129299	-0.442894	-0.233587
DZA15	Hsp104	Iso1	Rep2	7421	7892	5659	3605	8257	5957	8429	9351	8364	6331	16696	13486	0	0.045082	-0.00336203	-0.124304	0.296836	0.204107
DZA15	Hsp104	Iso2	Rep2	1751	73	5599	0	60	1000	2026	78	7285	0	96	2160	0	-1.41454	0.55579	#DIV/0!	-1.32437	0.0278143
DZA15	Hsp104	Iso3	Rep2	13035	5542	5925	4638	9219	3912	14354	5881	7074	6407	14775	7194	0	-0.387522	-0.307308	-0.350318	0.0125545	-0.300003
DZA15	Hsp104	Iso4	Rep2	7572	3607	4595	1660	792	7243	7171	2071	2043	585	206	1824	0	-0.5394	-0.545311	-1.08842	-1.54171	-0.594555
DMSO	Hsp104	Iso1	Rep1	5604	7027	8894	9804	10651	15585	6138	5602	6900	7390	8557	13325	0	-0.0396838	0.0508222	0.0806176	0.144295	0.33664
DMSO	Hsp104	Iso2	Rep1	4403	4043	6055	4737	7281	9410	6799	6011	9263	7800	12833	17807	0	-0.0534983	0.134307	0.0596496	0.275883	0.418146
DMSO	Hsp104	Iso3	Rep1	5489	13212	16718	5201	10156	7890	5441	11108	13431	4312	9368	7879	0	0.309957	0.39243	-0.101	0.235968	0.160792
DMSO	Hsp104	Iso4	Rep1	3117	18577	24804	7189	13179	12099	2779	11807	12836	3246	5268	4391	0	0.628251	0.664541	0.06746	0.277757	0.198675
DMSO	Hsp104	Iso1	Rep2	5521	7798	6117	9949	6780	7048	6383	8549	6668	11400	8415	9211	0	0.12689	0.0189707	0.25188	0.120029	0.159282
DMSO	Hsp104	Iso2	Rep2	5090	11030	14280	6744	6882	8590	5630	10964	13850	6477	7139	9051	0	0.289461	0.390941	0.0608655	0.103129	0.206188
DMSO	Hsp104	Iso3	Rep2	11190	5192	10428	10199	9661	4077	11643	4726	8962	9119	8821	3853	0	-0.391571	-0.11366	-0.106118	-0.120547	-0.480266
DMSO	Hsp104	Iso4	Rep2	12733	9799	12084	9645	21261	9557	11275	6035	5664	3809	7135	2798	0	-0.271439	-0.298993	-0.471306	-0.198723	-0.605269
AZC	Hsp104	Iso1	Rep1	3928	267	624	719	1415	4692	4608	432	1791	2263	1056	719	0	-1.02803	-0.410417	-0.308828	-0.639849	-0.806784
AZC	Hsp104	Iso2	Rep1	4008	1040	1111	900	390	259	6414	2945	5391	6940	6902	17983	0	-0.338044	-0.0754596	0.0342305	0.031846	0.447733
AZC	Hsp104	Iso3	Rep1	1939	878	1049	270	422	302	2051	1936	3413	1411	2594	579	0	-0.0250603	0.221171	-0.162439	0.102004	-0.549287
AZC	Hsp104	Iso4	Rep1	3049	1940	3808	1061	1407	1465	2907	3223	9591	2988	5473	6811	0	0.0448153	0.518419	0.0119356	0.27478	0.369766
AZC	Hsp104	Iso1	Rep2	4553	995	309	470	1447	1251	5397	2515	1187	1903	1140	244	0	-0.331614	-0.657702	-0.452714	-0.675248	-1.34476
AZC	Hsp104	Iso2	Rep2	5900	2760	1851	1734	6067	10675	6608	6423	7206	6209	2912	1104	0	-0.0123321	0.0376242	-0.0270484	-0.355879	-0.777101
AZC	Hsp104	Iso3	Rep2	10839	521	1691	445	1697	4863	13007	1126	6079	1163	2725	8475	0	-1.06264	-0.330345	-1.0486	-0.678811	-0.186037
AZC	Hsp104	Iso4	Rep2	8259	1789	2726	2168	6680	11831	8148	2927	6868	5525	4028	1192	0	-0.444628	-0.0742207	-0.168719	-0.305962	-0.834775
37C	Hsp104	Iso1	Rep1	7254	1810	614	1456	622	705	8335	1526	556	1388	672	686	0	-0.737351	-1.17583	-0.778516	-1.09354	-1.08458
37C	Hsp104	Iso2	Rep1	5496	5081	5475	7823	7491	7306	8736	7807	8968	13875	15187	15021	0	-0.0488284	0.011383	0.20092	0.240159	0.235386
37C	Hsp104	Iso3	Rep1	5127	3215	2680	960	633	1103	4813	3110	2518	911	689	1363	0	-0.189655	-0.28136	-0.722897	-0.844197	-0.54792
37C	Hsp104	Iso4	Rep1	3390	9627	10843	6058	7895	9627	2979	8730	8796	4736	6220	7056	0	0.466944	0.470215	0.201341	0.31972	0.374488
37C	Hsp104	Iso1	Rep2	8015	2077	993	1600	1900	222	9160	2464	1131	1897	2475	281	0	-0.570255	-0.908433	-0.683828	-0.56832	-1.51319
37C	Hsp104	Iso2	Rep2	9867	8658	5955	7295	6388	5538	10004	9172	6046	7882	7747	7108	0	-0.0377096	-0.218706	-0.103537	-0.11104	-0.148426
37C	Hsp104	Iso3	Rep2	13820	1331	829	2311	592	1517	14925	1207	719	2222	612	1563	0	-1.09221	-1.31719	-0.82717	-1.38716	-0.979955
37C	Hsp104	Iso4	Rep2	14750	6683	9266	10583	13513	6353	13471	5633	6977	7680	9337	4167	0	-0.37866	-0.285731	-0.244039	-0.159192	-0.509576
YPD	Btn2	Iso1	Rep1	5755	2942	8522	2895	4194	8465	6696	3023	8632	3002	4597	10328	0	-0.345377	0.110296	-0.348405	-0.163341	0.188201
YPD	Btn2	Iso2	Rep1	4029	1605	2706	2062	4765	3420	4973	1538	2891	2354	5882	4583	0	-0.509662	-0.23557	-0.324812	0.0729066	-0.0354686
YPD	Btn2	Iso3	Rep1	7904	10059	14961	7683	11131	6542	8064	9023	12698	6735	10022	6533	0	0.0488004	0.197185	-0.0782129	0.0944039	-0.0914379
YPD	Btn2	Iso4	Rep1	4931	2087	7255	1326	1648	9075	4446	1821	5292	999	1377	8027	0	-0.38766	0.0756504	-0.648404	-0.509036	0.256584
YPD	Btn2	Iso1	Rep2	13668	4613	14795	6736	6667	8027	12615	3112	11198	4964	5377	6777	0	-0.607848	-0.0517468	-0.405055	-0.370347	-0.26985
YPD	Btn2	Iso2	Rep2	5206	3274	3931	9232	2210	3812	4677	2557	2873	6840	1737	3248	0	-0.262237	-0.211632	0.165089	-0.430168	-0.158351
YPD	Btn2	Iso3	Rep2	21479	5978	8348	3616	3697	6027	22034	5822	7348	3470	3704	6082	0	-0.578021	-0.476924	-0.802764	-0.774422	-0.559047
YPD	Btn2	Iso4	Rep2	21199	3375	7382	2105	6800	1669	21731	3137	7885	2319	8391	2127	0	-0.840565	-0.440278	-0.971779	-0.413266	-1.00931
DZA30	Btn2	Iso1	Rep1	3951	2440	3329	1000	4060	3024	4823	2673	5175	1841	9472	8493	0	-0.256318	0.0305931	-0.418263	0.293124	0.245744
DZA30	Btn2	Iso2	Rep1	2269	998	4119	2828	13	346	3317	1130	6521	5276	17	1039	0	-0.467667	0.293569	0.201559	-2.2903	-0.50413
DZA30	Btn2	Iso3	Rep1	2186	2351	7347	1294	1804	793	2191	2994	11695	2723	4591	2430	0	0.135609	0.727358	0.0944053	0.321265	0.0449639
DZA30	Btn2	Iso4	Rep1	1651	3289	7580	2003	999	1933	1742	3505	10602	3593	2098	5115	0	0.30364	0.78434	0.314409	0.0807573	0.467797
DZA30	Btn2	Iso1	Rep2	4650	3984	3378	1680	2885	836	4542	4385	4830	3068	6649	2334	0	-0.0152775	0.0267	-0.170392	0.165509	-0.289146
DZA30	Btn2	Iso2	Rep2	5482	1039	2869	1260	2677	3487	5921	993	4233	2378	6095	9592	0	-0.775446	-0.145747	-0.396183	0.0125786	0.209514
DZA30	Btn2	Iso3	Rep2	9530	2481	2369	1734	2314	1951	11372	3070	3823	3517	6168	5997	0	-0.568698	-0.473433	-0.509664	-0.265692	-0.277903
DZA30	Btn2	Iso4	Rep2	5110	654	2246	649	5767	2775	5884	830	3913	1409	15830	8950	0	-0.850595	-0.177163	-0.620762	0.429808	0.18215
DZA15	Btn2	Iso1	Rep1	5599	1878	11109	2089	3598	6182	6788	1994	13729	2974	6251	11366	0	-0.532017	0.305897	-0.358401	-0.0357923	0.223866
DZA15	Btn2	Iso2	Rep1	2710	6203	4142	3487	0	259	3800	6425	5517	5150	0	462	0	0.22809	0.161919	0.132024	#DIV/0!	-0.915142
DZA15	Btn2	Iso3	Rep1	5291	4701	6881	4639	5579	6425	5334	4912	7886	6307	8700	11399	0	-0.0357947	0.169804	0.0727698	0.212466	0.329814
DZA15	Btn2	Iso4	Rep1	3373	69	1102	606	366	0	3207	57	1078	661	548	0	0	-1.75022	-0.47348	-0.685898	-0.767318	#DIV/0!
DZA15	Btn2	Iso1	Rep2	8119	7535	7997	1445	6924	4868	7404	6777	8813	1825	10167	7902	0	-0.0384289	0.0756574	-0.608204	0.137726	0.0282706
DZA15	Btn2	Iso2	Rep2	4483	223	9217	30	12	4810	4895	217	10737	53	18	8560	0	-1.35329	0.34113	-1.96548	-2.43448	0.242721
DZA15	Btn2	Iso3	Rep2	14458	3110	15003	2886	3145	3581	15005	3590	20146	4234	5724	7263	0	-0.621142	0.127953	-0.549485	-0.418536	-0.31512
DZA15	Btn2	Iso4	Rep2	9875	0	1018	1450	25	7140	10826	0	1347	2351	37	16094	0	#DIV/0!	-0.9051	-0.663215	-2.46627	0.172196
DMSO	Btn2	Iso1	Rep1	6362	2498	3465	1158	1553	4068	7239	2492	3541	1247	1779	5021	0	-0.463131	-0.310553	-0.763812	-0.609503	-0.158888
DMSO	Btn2	Iso2	Rep1	3657	1041	3406	5797	3378	6283	4579	1125	3946	6333	4097	7943	0	-0.609618	-0.0646136	0.140839	-0.0483047	0.239214
DMSO	Btn2	Iso3	Rep1	3420	6950	12029	1116	1915	3905	3530	6393	10598	1035	1774	3841	0	0.25793	0.477449	-0.532834	-0.298821	0.0366696
DMSO	Btn2	Iso4	Rep1	5506	1548	15124	1284	3498	5250	4979	1214	11163	1093	2807	4593	0	-0.612923	0.350639	-0.658522	-0.2489	-0.0350457
DMSO	Btn2	Iso1	Rep2	10062	546	6451	805	1279	1750	9857	373	5006	654	980	1666	0	-1.42204	-0.294254	-1.17817	-1.00252	-0.77207
DMSO	Btn2	Iso2	Rep2	5872	7723	2854	2831	4658	2310	5681	5956	2199	2201	3763	1957	0	0.0205299	-0.4122	-0.411805	-0.178891	-0.462834
DMSO	Btn2	Iso3	Rep2	20453	738	2668	4678	3950	2032	21581	666	2419	4232	3641	2049	0	-1.5106	-0.950436	-0.707526	-0.772851	-1.02253
DMSO	Btn2	Iso4	Rep2	8518	2587	3684	2243	10033	1812	9033	2767	3895	2482	12568	2327	0	-0.513823	-0.365325	-0.56103	0.143434	-0.589036
AZC	Btn2	Iso1	Rep1	3032	60	95	50	62	15	3963	121	349	298	664	439	0	-1.51524	-1.0552	-1.12381	-0.775856	-0.95556
AZC	Btn2	Iso2	Rep1	2888	231	682	322	1031	1478	3831	460	1963	1530	7613	11243	0	-0.920554	-0.290392	-0.398621	0.298244	0.46757
AZC	Btn2	Iso3	Rep1	3721	600	543	190	207	657	3975	1232	1583	722	489	639	0	-0.508726	-0.399856	-0.7408	-0.910028	-0.793836
AZC	Btn2	Iso4	Rep1	1829	739	2236	636	1837	6647	1860	1199	5096	1696	1110	871	0	-0.190694	0.437716	-0.0400871	-0.22419	-0.329495
AZC	Btn2	Iso1	Rep2	5020	1032	537	514	978	296	5307	2182	1839	993	251	21	0	-0.385994	-0.460267	-0.7279	-1.32518	-2.40263
AZC	Btn2	Iso2	Rep2	6700	1937	1459	1561	1506	1939	6870	3090	3274	3799	1705	1870	0	-0.346998	-0.321878	-0.257287	-0.605232	-0.565115
AZC	Btn2	Iso3	Rep2	9283	180	1208	139	470	509	10445	286	3341	269	225	149	0	-1.56254	-0.495032	-1.58916	-1.66673	-1.84572
AZC	Btn2	Iso4	Rep2	5324	527	1665	1368	658	84	5781	986	5397	6815	7866	2483	0	-0.768126	-0.0298506	0.0714629	0.133751	-0.367026
37C	Btn2	Iso1	Rep1	5958	2222	1391	600	730	223	7301	2321	1628	630	977	336	0	-0.497707	-0.651728	-1.06404	-0.873488	-1.33704
37C	Btn2	Iso2	Rep1	3953	2200	2035	6603	1640	2518	5051	2484	2378	8220	2490	4036	0	-0.308226	-0.327166	0.211494	-0.307178	-0.0974262
37C	Btn2	Iso3	Rep1	6270	2216	1654	3167	374	167	5931	2264	1574	3389	379	203	0	-0.418252	-0.576123	-0.243056	-1.19449	-1.46563
37C	Btn2	Iso4	Rep1	8130	1910	4830	1517	1803	2620	7987	1799	4491	1417	2003	3028	0	-0.647353	-0.250041	-0.751014	-0.600703	-0.421228
37C	Btn2	Iso1	Rep2	13396	2784	3781	994	1276	1017	12440	2411	3053	838	1347	1014	0	-0.712623	-0.610094	-1.17158	-0.965453	-1.08878
37C	Btn2	Iso2	Rep2	11164	2612	1952	1420	2240	2509	11086	2181	1700	1217	2217	2756	0	-0.706119	-0.814326	-0.959484	-0.699009	-0.604496
37C	Btn2	Iso3	Rep2	13989	229	885	1528	765	1270	14277	184	889	1487	884	1468	0	-1.88982	-1.20574	-0.982326	-1.20818	-0.987911
37C	Btn2	Iso4	Rep2	13891	1701	3306	2778	1739	6277	14569	1910	3906	3368	2330	9475	0	-0.882396	-0.571698	-0.636058	-0.796074	-0.186851
