# Supplementary material for: Proteotoxicity from aberrant ribosome biogenesis compromises cell fitness
Source: eLife. 2019 Mar 7;8:e43002. doi: 10.7554/eLife.43002 (PMC6453566; doi:10.7554/eLife.43002)
Supplement: Supplementary file 6. — The value of each protein is normalized to the total signal in each sample (TMT channel) to determine relative abundance within each sample (parts per million, ppm). [file elife-43002-supp6.xlsx]

## Sheet: Sheet1
Protein	DMSO_Input_A (ppm)	DZA_Input_A (ppm)	DMSO_Input_B (ppm)	DZA_Input_B (ppm)	AZC_Input (ppm)	DMSO_Pellet_A (ppm)	DZA_Pellet_A (ppm)	DMSO_Pellet_B (ppm)	DZA_Pellet_B (ppm)	AZC_Pellet (ppm)	DZA_DMSO_FoldChange_A	DZA_DMSO_FoldChange_B	ID
sp|Q12482|AGC1_YEAST	197.562	119.466	100.875	0	132.178	658.122	567.712	610.846	684.757	777.359	1.42653	#DIV/0!	Q12482
sp|Q12329|HSP42_YEAST	195.315	356.759	202.5	348.078	223.665	147.066	1318.75	118.238	1074.29	109.044	4.90916	5.28581	Q12329
sp|Q12080|NOP53_YEAST	379.947	326.136	435.986	345.471	397.938	162.014	779.626	194.066	803.712	194.901	5.60607	5.22649	Q12080
sp|P40078|NSA2_YEAST	427.375	444.604	467.552	375.216	400.582	239.891	625.802	191.457	578.864	202.632	2.5076	3.76752	P40078
sp|P53313|SDA1_YEAST	456.263	414.42	459.846	393.763	489.96	174.29	616.141	195.484	582.934	206.561	3.89207	3.48247	P53313
sp|P22543|VPS34_YEAST	74.3645	2233.69	201.429	195.34	110.704	218.154	166.927	193.138	600.819	174.062	0.0254746	3.20778	P22543
##sp|Q8N1G1|REXO1_HUMAN	772.235	1261.71	80.9127	33.7441	859.356	92.2696	707.942	67.6557	87.2745	54.2755	4.69602	3.09316	Q8N1G1
sp|Q04031|RRP17_YEAST	483.558	416.873	436.265	403.684	469.242	234.207	577.566	190.459	512.698	226.432	2.86053	2.90916	Q04031
contaminant_sp|TRYP_PIG|	544.984	336.53	328.152	284.036	296.264	288.717	291.415	307.904	725.273	337.261	1.63456	2.72137	TRYP_PIG
sp|P53952|YNF0_YEAST	496.061	741.196	380.043	299.924	439.456	224.116	480.908	231.671	495.783	180.4	1.43612	2.7117	P53952
sp|Q03455|MSC2_YEAST	86.5984	104.002	127.569	57.1474	100.507	687.712	596.277	638.672	745.972	706.09	0.721955	2.60731	Q03455
sp|P38911|FKBP3_YEAST	443.386	444.268	486.233	416.538	463.765	239.137	508.268	231.176	483.159	247.754	2.12121	2.4397	P38911
sp|P46677|TAF1_YEAST	362.019	528.301	462.365	388.598	427.525	209.928	531.803	275.359	535.293	226.527	1.73592	2.31301	P46677
sp|P40099|FTHC_YEAST	420.008	700.33	502.381	510.861	507.393	158.695	370.219	169.303	393.696	212.868	1.39911	2.2868	P40099
sp|P26755|RFA3_YEAST	498.653	557.321	507.036	471.211	584.033	233.881	244.02	208.523	411.961	195.226	0.933519	2.12581	P26755
sp|P43582|WWM1_YEAST	623.688	27.6916	782.13	817.385	434.941	181.01	168.857	187.833	411.504	197.84	21.0105	2.09631	P43582
sp|P10962|MAK16_YEAST	336.709	251.247	380.686	347.866	382.909	352.78	616.443	303.283	574.562	357.673	2.34176	2.07321	P10962
sp|P38961|RRP8_YEAST	442.856	464.447	433.651	429.07	438.079	232.318	487.435	252.043	514.707	258.726	2.0006	2.06394	P38961
sp|Q04964|SML1_YEAST	705.274	727.495	632.241	472.64	637.72	125.311	176.536	114.734	175.388	137.726	1.36575	2.04484	Q04964
sp|Q12272|TPT1_YEAST	418.366	403.606	451.219	432.804	439.926	264.706	264.282	298.188	581.364	362.117	1.03491	2.03261	Q12272
sp|P24000|RL24B_YEAST	368.434	282.424	370.012	283.377	315.381	315.325	503.944	401.556	614.581	467.084	2.08489	1.99841	P24000
sp|P32505|NAB2_YEAST	466.148	473.376	450.615	527.668	451.869	199.278	452.122	217.639	500.405	192.56	2.23415	1.9635	P32505
sp|Q12288|YL126_YEAST	626.803	665.5	648.849	518.127	543.608	124.238	248.553	160.924	252.127	120.636	1.88429	1.96203	Q12288
sp|P25627|BUD23_YEAST	529.132	411.452	623.994	583.258	573.827	161.472	301.774	182.337	334.17	186.974	2.40342	1.9607	P25627
##sp|A6NNB3|IFM5_HUMAN	80.3114	82.014	91.076	79.288	84.3698	665.166	578.454	567.296	966.645	706.484	0.851584	1.95728	A6NNB3
sp|P35127|UBL1_YEAST	587.797	718.974	603.19	599.492	575.848	105.732	205.611	123.378	239.505	156.598	1.58984	1.9532	P35127
sp|P51533|PDR10_YEAST	66.9372	12.3598	101.809	125.509	54.7655	616.914	366.022	606.346	1458.74	571.798	3.21321	1.95151	P51533
sp|P25367|RNQ1_YEAST	298.207	275.173	241.151	233.649	264.827	364.711	790.384	362.069	677.272	427.471	2.34855	1.93062	P25367
sp|P38222|RKM3_YEAST	615.407	944.241	497.545	480.914	645.325	138.158	221.446	107.854	198.234	90.3583	1.04466	1.90154	P38222
sp|P54790|ORC3_YEAST	463.685	520.578	508.22	607.575	540.93	180.232	358.144	157.106	355.91	217.296	1.76996	1.89495	P54790
sp|P43321|SMD3_YEAST	609.136	629.635	509.127	419.72	644.456	191.022	278.679	169.471	263.893	190.182	1.41138	1.88886	P43321
##sp|P53940|APJ1_YEAST	381.712	443.345	346.181	326.657	346.136	292.603	529.999	327.38	582.581	356.3	1.55952	1.88588	P53940
sp|P36159|RNZ_YEAST	495.383	473.834	520.034	332.196	629.758	294.514	303.004	258.723	310.671	257.85	1.07561	1.87977	P36159
sp|P38351|PAF1_YEAST	605.974	540.38	660.33	617.647	615.956	123.054	237.662	127.021	219.752	139.564	2.1658	1.8496	P38351
sp|Q06205|FKBP4_YEAST	401.574	428.651	436.954	400.109	419.392	303.344	533.236	279.402	472.458	299.296	1.64682	1.84668	Q06205
sp|P37263|YC16_YEAST	369.868	475.62	292.517	293.85	391.788	294.676	663.349	299.987	551.756	308.754	1.75059	1.83092	P37263
sp|P0CX46|RL2B_YEAST	474.769	399.04	465.734	394.237	462.132	240.787	462.409	272.628	420.248	285.254	2.28486	1.82102	P0CX46
##sp|Q66K14|TBC9B_HUMAN	576.064	626.647	575.245	628.227	573.473	133.121	215.705	149.713	294.078	136.446	1.48958	1.79862	Q66K14
sp|Q02753|RL21A_YEAST	496.021	430.851	496.9	372.091	478.059	230.466	490.464	278.536	373.033	250.403	2.45005	1.78849	Q02753
sp|P32342|SRP21_YEAST	434.889	424.76	459.693	450.094	484.258	254.11	469.238	242.051	423.633	261.265	1.89063	1.78751	P32342
sp|P49167|RL38_YEAST	362.653	269.784	361.35	282.859	370.742	349.217	557.572	381.72	532.266	404.346	2.14625	1.78132	P49167
sp|Q8TDF6|GRP4_HUMAN	395.974	630.146	498.33	341.866	418.433	218.167	438.967	322.91	391.887	265.494	1.26435	1.76905	Q8TDF6
sp|P40367|GPI7_YEAST	67.7056	151.219	144.645	87.1489	107.67	721.843	541.642	668.516	711.817	634.774	0.33596	1.76725	P40367
sp|P40039|FCY21_YEAST	365.283	156.54	336.644	218.187	85.8083	541.293	500.045	525.601	601.902	513.457	2.15567	1.7669	P40039
sp|Q04472|MGR3_YEAST	103.93	103.001	124.75	93.1798	108.324	699.788	630.71	579.098	764.246	721.534	0.909423	1.76685	Q04472
sp|P20604|PP11_YEAST	592.209	637.472	550.808	544.25	590.799	152.429	279.904	154.903	268.823	136.871	1.70591	1.75635	P20604
sp|P25359|RRP43_YEAST	514.348	634.448	505.645	553.598	528.593	166.663	323.94	176.315	338.65	178.131	1.57574	1.75434	P25359
sp|P38801|LRP1_YEAST	482.56	608.539	441.165	481.362	474.117	208.965	418.492	199.514	381.465	229.174	1.58809	1.75231	P38801
sp|Q06677|SWA2_YEAST	524.162	664.716	453.542	592.222	545.853	183.485	212.019	146.664	333.838	261.212	0.911176	1.74319	Q06677
sp|P04456|RL25_YEAST	527.829	438.515	517.415	435.658	466.749	217.32	425.322	249.857	363.545	231.222	2.35574	1.72806	P04456
sp|P04449|RL24A_YEAST	379.745	328.366	382.249	291.112	298.956	303.71	603.603	411.794	540.656	364.298	2.2984	1.72396	P04449
sp|P36094|SPC42_YEAST	289.701	410.504	476.12	363.863	350.703	304.076	438.639	392.557	512.037	360.743	1.01802	1.70678	P36094
sp|P36036|YRA2_YEAST	595.127	498.933	514.239	516.64	584.274	160.412	285.244	199.382	340.953	207.367	2.12103	1.7021	P36036
sp|Q08229|NBA1_YEAST	372.484	337.041	424.864	329.524	348.831	370.939	391.624	381.367	500.261	421.073	1.16679	1.69129	Q08229
sp|P36144|RL1D1_YEAST	428.518	462.203	410.125	436.641	437.597	250.149	493.28	250.431	450.26	296.819	1.82823	1.68875	P36144
sp|P08432|DCOR_YEAST	575.233	720.001	696.51	592.758	609.689	106.601	184.901	112.12	161.117	140.532	1.38577	1.68851	P08432
sp|Q06143|DIC1_YEAST	118.445	101.993	126.624	90.5907	134.998	706.747	648.831	530.875	641.157	617.354	1.06614	1.68813	Q06143
sp|P54000|SUB1_YEAST	558.681	681.753	557.351	439.557	645.09	169.744	242.059	178.405	235.891	196.89	1.16859	1.67656	P54000
sp|Q3E772|YG169_YEAST	522.947	508.084	542.786	561.588	504.814	188.461	236.073	194.36	336.949	298.237	1.28928	1.67559	Q3E772
sp|P38922|HRB1_YEAST	552.202	437.77	491.176	636.695	724.032	196.626	232.142	127.868	277.729	202.213	1.48925	1.67558	P38922
sp|P36006|MYO3_YEAST	342.853	367.567	358.194	383.196	400.78	326.481	370.005	393.739	705.542	310.625	1.05711	1.67499	P36006
sp|Q08959|PGC1_YEAST	189.955	217.515	232.869	171.632	223.111	561.042	524.005	515.597	634.636	593.797	0.815646	1.67004	Q08959
sp|P05748|RL15A_YEAST	498.599	301.826	488.432	389.909	437.742	286.853	440.213	314.047	417.944	274.789	2.53512	1.66711	P05748
sp|P31385|DEP1_YEAST	445.312	416.076	579.403	521.663	405.06	233.063	382.705	271.759	407.105	227.679	1.75745	1.66385	P31385
sp|P32864|RAEP_YEAST	540.501	521.85	580.56	468.695	542.13	186.124	240.338	231.915	311.466	267.344	1.33743	1.66356	P32864
##sp|P39722|GEM1_YEAST	691.247	63.3924	609.886	554.69	340.606	290.85	230.226	304.335	460.119	288.664	8.63139	1.66233	P39722
sp|P46948|RRP41_YEAST	497.146	585.673	545.165	475.521	543.444	176.304	374.194	216.674	313.416	181.443	1.80162	1.65834	P46948
sp|P26793|FEN1_YEAST	486.617	536.28	478.454	476.362	525.293	195.148	468.067	223.811	368.717	205.427	2.17641	1.65468	P26793
sp|O95237|LRAT_HUMAN	522.749	495.199	504.9	410.24	454.588	226.504	396.344	254.573	342.03	288.802	1.84718	1.65356	O95237
sp|P47089|DENR_YEAST	580.648	555.804	566.031	502.256	589.102	194.045	242.279	190.167	278.948	191.093	1.30438	1.65312	P47089
##sp|O43916|CHST1_HUMAN	518.864	569.062	462.253	461.069	485.972	250.883	344.349	222.811	367.35	222.947	1.25147	1.65294	O43916
sp|Q06644|PMT7_YEAST	77.457	92.0276	59.9965	37.2105	88.8261	706.62	482.406	743.059	758.728	788.897	0.574606	1.64636	Q06644
sp|Q8WY54|PPM1E_HUMAN	401.576	428.09	427.181	373.161	440.344	286.006	333.842	332.479	478.127	397.971	1.09496	1.64624	Q8WY54
sp|Q9HCM1|K1551_HUMAN	507.269	443.242	444.472	408.404	533.31	257.274	403.127	240.525	363.115	291.972	1.79326	1.643	Q9HCM1
sp|P38845|CRP1_YEAST	349.74	389.913	368.728	402.254	362.023	311.95	426.783	339.318	607.408	332.102	1.22716	1.64089	P38845
sp|P25555|GBP2_YEAST	488.383	511.785	498.96	513.915	501.215	197.92	319.454	223.198	375.663	213.997	1.54025	1.63412	P25555
sp|P02406|RL28_YEAST	475.931	357.71	505.472	477.843	422.405	245.632	362.534	290.458	448.461	275.607	1.9637	1.63325	P02406
sp|P22336|RFA1_YEAST	433.708	497.507	448.801	417.669	468.87	296.007	305.017	309.74	470.539	253.732	0.8983	1.63238	P22336
sp|P53938|EOS1_YEAST	193.357	200.063	203.719	131.639	215.444	657.465	535.235	538.8	568.029	590.226	0.786801	1.63151	P53938
sp|P48606|TBCA_YEAST	681.777	660.658	625.124	607.065	631.176	110.378	141.304	117.263	185.234	130.681	1.32111	1.62664	P48606
sp|P18496|ATP10_YEAST	141.918	73.9348	132.757	101.762	142.37	708.168	547.977	588.203	729.847	674.177	1.4853	1.61874	P18496
sp|Q12149|RRP6_YEAST	514.142	587.173	520.609	395.098	417.635	213.455	446.314	259.715	319.031	233.176	1.83085	1.61861	Q12149
sp|P25368|RRP7_YEAST	327.048	286.388	346.483	343.7	344.781	328.229	659.189	354.499	566.242	303.111	2.29345	1.61024	P25368
sp|P0CX27|RL44A_YEAST	476.093	470.28	490.51	415.536	425.082	246.493	429.962	289.065	393.867	261.42	1.76588	1.6084	P0CX27
sp|P53177|TYW3_YEAST	586.744	513.599	782.789	766.085	644.156	136.824	42.757	75.8621	118.948	181.944	0.357001	1.60213	P53177
sp|P38792|RRP4_YEAST	531.317	633.306	510.396	531.958	532.17	188.61	310.274	198.081	330.115	174.627	1.38013	1.59901	P38792
sp|P53742|NOG2_YEAST	512.852	483.137	486.407	439.848	489.388	226.894	381.869	251.077	362.516	232.845	1.78654	1.59667	P53742
sp|P38779|CIC1_YEAST	359.654	373.222	348.761	341.692	354.637	353.435	559.828	339.089	529.53	338.786	1.52638	1.59393	P38779
sp|P53072|TAN1_YEAST	638.039	558.705	647.002	647.291	630.593	122.834	240.656	127.766	203.087	101.118	2.23739	1.58882	P53072
sp|P40343|VPS27_YEAST	290.767	365.613	311.811	298.995	340.903	326.178	421.555	395.661	602.244	559.384	1.02783	1.58737	P40343
sp|P46990|RL17B_YEAST	483.924	407.876	458.112	385.891	434.151	270.151	438.96	306.065	409.225	296.427	1.92782	1.58728	P46990
sp|Q07648|DTD_YEAST	481.069	514.239	430.428	441.259	527.986	345.829	356.425	217.37	352.106	217.353	0.96416	1.58008	Q07648
sp|P40693|RLP7_YEAST	362.803	347.553	382.864	358.87	345.741	350.819	555.517	337.295	498.979	337.439	1.65297	1.57826	P40693
sp|P53851|TEX1_YEAST	572.206	450.938	600.196	563.214	524.635	133.682	324.454	231.013	341.097	154.258	3.07975	1.57348	P53851
sp|Q03973|HMO1_YEAST	358.994	497.689	446.828	472.506	401.95	211.335	438.043	326.318	539.778	222.006	1.49511	1.56425	Q03973
sp|P00431|CCPR_YEAST	434.763	392.503	422.34	390.707	437.7	328.174	508.039	276.978	400.709	294.65	1.71476	1.56385	P00431
##sp|Q08965|BMS1_YEAST	257.135	232.121	281.838	236.336	287.909	423.785	518.121	490.248	642.287	517.812	1.35435	1.56237	Q08965
sp|O15050|TRNK1_HUMAN	481.557	589.043	530.071	441.281	460.14	211.062	358.293	267.096	346.891	220.58	1.3878	1.56007	O15050
sp|P37838|NOP4_YEAST	356.332	376.262	365.387	356.319	363.016	325.502	571.794	345.135	524.75	337.024	1.6636	1.55912	P37838
sp|P40007|NOP16_YEAST	387.772	392.05	352.496	352.344	348.419	352.148	497.664	318.107	495.573	378.959	1.3978	1.55855	P40007
sp|P53157|MPC1_YEAST	140.739	109.913	145.224	115.329	112.996	690.057	625.691	572.015	699.954	634.653	1.16102	1.54086	P53157
sp|P53297|PBP1_YEAST	406.926	380.895	460.983	373.892	425.107	308.991	372.698	329.239	411.209	352.058	1.28861	1.53989	P53297
sp|Q02908|ELP3_YEAST	496.893	1070.37	364.989	344.633	602.167	160.133	341.123	173.508	252.07	164.124	0.98891	1.5386	Q02908
sp|Q12406|ARP7_YEAST	470.304	544.872	463.729	471.016	498.923	220.722	268.779	276.371	430.281	266.099	1.05108	1.53281	Q12406
##sp|Q9HBA0|TRPV4_HUMAN	403.384	416.677	393.992	362.485	429.167	339.005	364.296	328.791	461.994	388.821	1.04032	1.52726	Q9HBA0
sp|P32794|AFG2_YEAST	441.529	511.665	473.833	455.158	502.593	306.464	269.315	266.335	388.399	271.663	0.758322	1.51814	P32794
sp|P38624|PSB1_YEAST	458.218	562.305	573.022	547.697	543.154	202.014	240.675	233.51	338.4	196.827	0.970847	1.5162	P38624
sp|Q12030|TAF10_YEAST	483.735	571.642	508.573	475.659	527.363	199.253	345.829	238.686	338.3	216.797	1.46873	1.51542	Q12030
sp|Q9NQ88|TIGAR_HUMAN	536.521	386.258	550.493	485.647	561.733	286.137	248.593	244.591	326.428	234.443	1.20677	1.51279	Q9NQ88
sp|P20049|TYR1_YEAST	680.072	703.362	488.849	406.269	802.478	146.979	271.486	125.796	157.972	122.485	1.78595	1.51103	P20049
sp|Q6NY19|KANK3_HUMAN	434.599	367.979	450.42	428.533	483.497	253.736	441.648	302.103	432.828	297.571	2.05571	1.50589	Q6NY19
sp|P22943|HSP12_YEAST	742.978	874.014	589.228	645.386	676.34	71.2756	65.1517	54.7667	90.1942	96.232	0.777039	1.50358	P22943
sp|Q96G03|PGM2_HUMAN	536.758	423.908	486.192	405.076	481.085	260.441	348.28	297.484	372.494	270.385	1.69327	1.50289	Q96G03
sp|P36160|RPF2_YEAST	434.607	445.326	472.26	446.424	399.819	311.791	420.374	281.369	399.711	273.973	1.31581	1.50281	P36160
sp|P32590|HSP79_YEAST	506.864	657.528	475.793	525.147	533.317	194.108	331.42	182.943	302.869	203.322	1.31617	1.49995	P32590
sp|P41800|MMM1_YEAST	73.7235	58.3964	91.3892	81.7423	100.144	694.019	622.742	566.882	759.717	806.427	1.13281	1.49833	P41800
sp|P03871|REP1_YEAST	352.636	582.752	353.282	538.324	385.77	224.405	548.157	222.573	507.83	204.8	1.47814	1.49735	P03871
sp|P07253|CBP6_YEAST	84.7108	110.122	111.328	91.7241	143.8	669.222	552.748	603.542	744.092	719.929	0.635365	1.49637	P07253
sp|P25613|ADY2_YEAST	98.0396	92.5241	107.859	107.097	99.2376	746.172	591.506	547.356	809.737	659.963	0.839975	1.48989	P25613
sp|P53859|CSL4_YEAST	526.843	519.724	553.049	562.504	542.725	185.639	291.992	202.725	307.129	199.538	1.59445	1.48954	P53859
sp|Q06709|REH1_YEAST	529.489	521.495	413.187	541.556	544.158	227.608	403.271	188.431	366.819	171.528	1.79894	1.48526	Q06709
sp|P40509|COPE_YEAST	503.74	531.002	524.636	523.432	560.425	184.678	290.187	210.405	311.605	180.614	1.49064	1.48438	P40509
##sp|Q86WN1|FCSD1_HUMAN	347.927	163.919	543.237	444.733	219.562	401.555	262.01	458.63	557.087	443.144	1.38494	1.48371	Q86WN1
sp|P27882|ERV1_YEAST	241.001	394.559	349.124	243.1	335.234	464.943	564.113	447.743	462.516	367.671	0.741095	1.48352	P27882
sp|P51401|RL9B_YEAST	448.801	363.596	517.786	441.538	434.069	276.219	370.11	325.816	411.92	286.681	1.65391	1.48259	P51401
sp|P25451|PSB3_YEAST	806.967	608.881	698.786	589.073	452.587	89.5451	222.561	115.853	144.034	107.27	3.29406	1.4748	P25451
sp|P38086|RDH54_YEAST	454.734	548.216	411.156	405.692	697.259	166.215	304.471	197.777	287.46	434.196	1.51943	1.47303	P38086
sp|Q12213|RL7B_YEAST	535.586	533.467	481.911	394.417	520.631	297.959	307.551	243.898	293.89	268.74	1.03629	1.47227	Q12213
sp|Q12754|RRP12_YEAST	416.058	379.279	450.965	469.714	392.638	282.678	421.273	305.004	467.414	270.153	1.63481	1.47131	Q12754
sp|P32564|SCM4_YEAST	118.627	100.912	84.8976	65.3666	99.133	731.885	623.385	607.159	687.522	687.014	1.00128	1.4707	P32564
sp|P38333|ENP1_YEAST	503.677	592.956	483.06	497.975	488.628	205.144	426.224	220.274	333.896	199.252	1.76485	1.47042	P38333
sp|Q08237|REXO4_YEAST	398.813	470.972	390.23	406.421	382.021	307.393	426.383	314.436	481.416	328.077	1.17458	1.47006	Q08237
sp|P29055|TF2B_YEAST	404.478	667.034	619.194	500.567	472.643	256.075	272.249	206.999	245.885	241.549	0.644683	1.46936	P29055
sp|P15992|HSP26_YEAST	772.886	752.981	515.83	535.61	518.736	144.12	241.406	125.038	190.68	114.746	1.71932	1.46866	P15992
sp|P05318|RLA1_YEAST	539.713	474.232	545.205	425.519	491.443	244.352	297.902	286.272	327.406	253.008	1.38749	1.46538	P05318
sp|P38805|RPF1_YEAST	368.272	401.43	361.937	390.728	362.941	323.161	560.499	307.273	485.464	324.697	1.59116	1.46349	P38805
sp|P38636|ATX1_YEAST	724.627	685.031	640.8	588.48	782.028	86.8888	67.9253	84.1069	112.791	114.853	0.826937	1.46028	P38636
##tr|A2RRE0|A2RRE0_HUMAN	517.593	365.73	557.607	449.563	462.095	267.774	298.79	296.603	348.299	299.616	1.57915	1.45652	A2RRE0
sp|Q99271|NAH1_YEAST	208.508	216.529	137.231	122.279	151.361	610.315	530.602	562.486	728.686	605.793	0.837185	1.45389	Q99271
sp|P0CX26|RL43B_YEAST	503.664	436.392	491.779	373.127	522.644	288.423	340.451	281.089	309.832	304.048	1.36236	1.45277	P0CX26
sp|P53550|DCP2_YEAST	499.637	634.715	555.992	522.175	585.003	172.997	303.337	181.484	247.539	201.151	1.38027	1.4523	P53550
sp|P53083|MDM34_YEAST	389.257	403.711	351.363	446.29	300.906	450.392	468.348	283.24	522.13	271.345	1.00264	1.45132	P53083
sp|P38063|KPR4_YEAST	605.352	685.278	640.456	575.573	592.927	122.688	145.349	143.242	186.445	161.483	1.04653	1.44834	P38063
sp|Q03102|YMN1_YEAST	562.381	542.432	450.551	447.004	549.171	219.756	359.457	211.364	303.319	252.086	1.69587	1.44644	Q03102
##sp|Q00245|RHO3_YEAST	558.484	941.658	373.515	329.698	602.079	170.787	358.099	185.397	236.696	193.026	1.24356	1.44637	Q00245
sp|P05986|KAPC_YEAST	587.729	673.631	582.702	557.962	551.076	153.718	249.988	160.439	221.824	160.857	1.41889	1.44391	P05986
sp|P32769|HBS1_YEAST	534.23	554.44	592.715	547.132	598.209	179.998	211.414	183.898	244.65	212.492	1.13172	1.44119	P32769
sp|P38786|RPP1_YEAST	662.081	576.857	545.014	467.538	545.875	178.891	223.427	197.066	243.601	247.429	1.43347	1.44098	P38786
sp|P47082|AVT1_YEAST	111.931	109.462	116.323	87.1341	90.3553	702.263	646.402	613.054	661.523	697.365	0.941221	1.44054	P47082
sp|Q06344|ESF1_YEAST	493.101	545.826	515.094	524.713	498.699	191.369	360.309	227.211	333.345	216.41	1.70093	1.44022	Q06344
sp|P41318|LST8_YEAST	223.789	208.874	195.632	202.164	247.262	456.981	654.275	478.372	711.733	524.905	1.53397	1.43975	P41318
sp|P47047|MTR4_YEAST	520.546	448.457	548.391	544.141	521.855	190.997	326.689	237.702	339.357	197.07	1.98539	1.43881	P47047
sp|Q07844|RIX7_YEAST	514.711	539.738	491.431	463.381	507.968	216.661	359.708	258.62	350.482	215.553	1.58325	1.43723	Q07844
sp|Q07381|TSR1_YEAST	613.718	634.753	569.657	550.858	550.753	152.739	254.949	178.212	247.611	169.711	1.61387	1.43683	Q07381
sp|P53551|H1_YEAST	515.15	467.927	541.268	470.021	559.778	220.234	300.87	242.819	302.799	254.957	1.50401	1.43604	P53551
sp|P36049|EBP2_YEAST	357.744	408.028	357.347	349.432	363.277	356.142	531.053	355.547	498.191	354.914	1.30737	1.43293	P36049
sp|P53923|CTU2_YEAST	392.322	405.463	467.425	472.408	390.975	302.794	397.153	307.201	444.86	306.285	1.26912	1.43283	P53923
sp|P51601|GCH1_YEAST	562.462	463.013	514.281	515.084	560.101	212.947	296.917	222.858	318.876	172.159	1.6938	1.42862	P51601
sp|Q03759|YMK8_YEAST	606.131	545.585	515.442	459.485	594.373	179.237	411.848	157.762	200.559	219.501	2.55277	1.4261	Q03759
sp|Q06132|SGD1_YEAST	363.837	435.532	402.257	358.972	369.049	309.63	571.683	332.452	422.324	331.08	1.54241	1.42351	Q06132
sp|Q06567|MCP2_YEAST	187.604	169.176	209.295	184.871	199.054	579.009	463.628	515.606	647.816	699.169	0.88795	1.42241	Q06567
sp|A4D263|CG072_HUMAN	88.5113	24.0797	131.69	110.77	54.048	730.832	267.052	763.523	911.904	753.952	1.34315	1.41989	A4D263
sp|Q12247|FYV7_YEAST	479.064	497.29	462.239	486.353	460.85	210.3	419.251	267.719	399.51	225.274	1.92052	1.41829	Q12247
sp|Q12035|FCF2_YEAST	338.427	414.699	344.019	409.882	342.961	312.045	608.052	314.941	531.886	285.784	1.59021	1.41747	Q12035
sp|P05738|RL9A_YEAST	481.849	420.847	488.895	453.599	436.461	254.541	400.018	306.163	401.581	281.83	1.79932	1.41372	P05738
sp|Q03735|NAB6_YEAST	349.811	384.882	375.413	376.937	432.897	375.956	391.017	306.441	434.404	449.535	0.945288	1.41185	Q03735
sp|P36141|FMP46_YEAST	479.41	531.667	433.887	421.154	491.034	361.724	377.722	205.991	282.082	287.904	0.941594	1.41079	P36141
sp|P40893|REE1_YEAST	828.67	928.593	409.481	480.819	568.76	171.047	177.346	111.959	185.456	135.257	0.925254	1.41069	P40893
sp|P36121|RPC5_YEAST	399.667	350.981	503.255	394.29	375.859	355.77	382.6	349.348	385.865	343.077	1.22459	1.40978	P36121
sp|P36163|OMA1_YEAST	168.291	240.027	196.908	166.805	243.389	620.802	541.884	507.857	606.054	562.524	0.612003	1.40872	P36163
sp|P42846|KRI1_YEAST	463.992	469.186	428.516	457.591	453.185	219.741	537.561	274.738	412.52	212.653	2.41926	1.4061	P42846
sp|P32899|IMP3_YEAST	300.577	367.392	314.105	355.911	306.895	342.034	625.487	376.671	599.766	297.223	1.49615	1.40525	P32899
sp|Q12024|YTM1_YEAST	362.904	387.978	353.97	328.692	328.986	401.184	529.106	357.535	465.738	379.05	1.23363	1.40282	Q12024
sp|Q12163|NBP2_YEAST	552.853	627.112	675.058	715.359	654.249	98.3017	162.586	115.73	171.973	112.917	1.4581	1.40227	Q12163
sp|P0C2H7|RL27B_YEAST	438.693	446.823	493.034	434.887	453.001	253.239	451.807	302.519	374.075	268.846	1.75165	1.40187	P0C2H7
sp|Q04603|DPB4_YEAST	396.601	432.075	464.715	373.406	506.083	307.07	321.074	364.29	410.316	302.684	0.959762	1.40177	Q04603
sp|P38630|RFC1_YEAST	451.977	514.121	481.966	479.874	486.785	238.414	339.226	254.101	354.364	250.76	1.25086	1.40066	P38630
sp|Q12256|TPO4_YEAST	71.6172	87.1442	113.564	94.0842	84.8442	596.484	487.802	725.017	841.141	765.27	0.672083	1.40038	Q12256
sp|P39938|RS26A_YEAST	549.428	564.672	534.297	422.986	474.185	216.242	346.2	264.234	292.357	223.967	1.55777	1.3976	P39938
sp|P24276|SSD1_YEAST	437.14	460.526	462.565	459.814	461.015	264.833	393.243	283.767	393.911	275.548	1.40947	1.39645	P24276
sp|P38820|UBA4_YEAST	636.764	606.046	594.309	489.88	638.625	177.91	177.656	169.584	195.055	195.463	1.04918	1.39539	P38820
sp|P53230|TAM41_YEAST	113.397	129.83	153.623	128.598	147.19	688.2	510.126	561.519	655.768	747.854	0.647424	1.39511	P53230
sp|Q02804|ARL3_YEAST	154.342	131.561	134.441	110.296	145.635	638.243	606.356	584.524	668.567	675.73	1.11455	1.39417	Q02804
sp|Q8WTT2|NOC3L_HUMAN	827.232	714.414	665.494	589.994	703.398	75.6371	46.7131	78.968	97.3865	88.078	0.715123	1.39105	Q8WTT2
sp|Q08269|ALR1_YEAST	155.601	127.493	141.59	101.863	126.837	735.653	503.203	666.517	666.144	595.237	0.834828	1.38922	Q08269
sp|P38256|YBU6_YEAST	191.517	241.304	174.418	142.399	195.681	608.901	526.396	552.514	625.77	597.407	0.686134	1.38725	P38256
sp|P39529|YJU6_YEAST	248.617	272.63	219.724	192.786	176.517	509.177	604.525	505.885	613.234	534.924	1.08269	1.38158	P39529
sp|P32910|RPC6_YEAST	350.542	379.607	400.7	353.236	402.063	373.406	408.116	395.312	481.299	334.006	1.00927	1.38111	P32910
##sp|P15565|TRM1_YEAST	573.434	758.978	580.363	565.518	576.965	175.853	159.926	146.049	196.487	165.341	0.687109	1.38066	P15565
sp|P10080|SSBP1_YEAST	500.876	540.146	518.203	499.134	541.496	222.335	295.89	216.242	287.006	243.041	1.23407	1.37795	P10080
sp|P39718|PEX22_YEAST	87.1813	118.911	102.749	84.2238	130.143	676.854	694.923	589.273	664.255	698.553	0.752737	1.37518	P39718
sp|P53167|PUS2_YEAST	535.654	561.212	468.909	462.612	514.034	203.432	362.286	222.335	301.52	268.01	1.69976	1.37461	P53167
sp|P40079|LCP5_YEAST	407.777	577.73	390.074	469.772	433.201	213.33	502.733	253.667	419.648	237.737	1.66335	1.37366	P40079
sp|P38753|HSE1_YEAST	273.004	315.017	349.817	341.452	378.993	350.103	371.639	451.401	604.484	457.542	0.919943	1.37193	P38753
sp|P01097|ATIF_YEAST	576.382	538.109	503.922	522.086	608.875	242.38	213.804	133.726	189.974	338.933	0.944842	1.37119	P01097
sp|P20433|RPB4_YEAST	494.381	510.272	518.304	476.156	510.327	188.417	362.914	274.132	344.888	194.101	1.86614	1.36947	P20433
sp|P38833|YHS7_YEAST	558.542	469.185	583.461	537.518	553.959	179.267	307.195	216.274	272.293	201.849	2.03997	1.36663	P38833
sp|P38723|COS8_YEAST	70.6142	53.4146	119.063	105.945	99.5367	425.872	465.906	806.713	980.669	780.206	1.44628	1.36615	P38723
sp|Q12191|BUG1_YEAST	422.315	457.158	387.742	412.726	457.073	330.421	337.277	287.886	418.477	376.051	0.942952	1.36563	Q12191
sp|P39516|RS14B_YEAST	393.027	381.477	422.061	343.259	394.595	323.223	473.667	380.279	422.213	331.719	1.50982	1.36516	P39516
sp|P41819|DIM1_YEAST	552.618	570.187	488.632	519.465	533.169	188.937	331.81	215.251	312.276	221.751	1.70208	1.36464	P41819
sp|Q12314|SFM1_YEAST	659.569	583.285	634.383	660.795	708.961	112.771	134.382	93.4776	132.805	98.4668	1.34748	1.36393	Q12314
sp|P25651|CSM1_YEAST	254.207	247.576	256.84	245.626	264.468	534.582	537.2	441.05	574.997	507.77	1.03181	1.36322	P25651
sp|P05740|RL17A_YEAST	474.683	397.781	505.549	421.238	455.745	260.439	420.529	298.541	338.435	268.228	1.92686	1.36052	P05740
sp|P25386|USO1_YEAST	339.298	470.929	360.932	381.122	419.775	466.702	296.91	327.936	471.091	391.578	0.458364	1.36044	P25386
sp|P09959|SWI6_YEAST	456.764	411.848	653.221	628.545	556.031	214.183	239.933	199.635	261.051	237.827	1.24239	1.35898	P09959
sp|P36047|SDS22_YEAST	539.266	521.425	557.55	550.924	559.997	196.342	269.553	216.619	290.585	198.918	1.41985	1.35759	P36047
sp|Q00245|RHO3_YEAST	110.226	150.622	102.699	85.0938	115.54	732.859	548.822	554.188	622.732	690.48	0.548036	1.35617	Q00245
sp|Q04432|HSP31_YEAST	582.768	660.218	730.085	765.282	694.09	89.2368	42.8857	91.5009	130.007	90.8007	0.424207	1.35548	Q04432
sp|P53271|COG2_YEAST	386.738	295.265	359.139	316.04	335.849	440.952	502.805	398.754	475.544	350.957	1.49353	1.35521	P53271
sp|P47095|MTNB_YEAST	580.574	737.272	574.762	557.972	593.718	120.74	212.085	150.877	198.321	181.601	1.38321	1.354	P47095
sp|P32465|HXT1_YEAST	108.897	67.492	84.1881	62.0854	67.2219	871.062	724.617	670.179	668.994	444.755	1.34222	1.35361	P32465
sp|P32347|DCUP_YEAST	692.958	659.793	610.873	671.977	701.936	124.081	108.924	84.2341	125.289	99.6679	0.921973	1.35213	P32347
sp|P38341|MIC12_YEAST	74.3936	25.7455	115.932	94.0809	83.4903	757.43	282.854	724.513	794.301	862.553	1.07908	1.35095	P38341
sp|P09232|PRTB_YEAST	403.799	427.034	344.29	376.723	360.872	328.725	491.442	340.723	503.398	350.691	1.41365	1.35025	P09232
sp|P47076|RPC9_YEAST	380.513	342.205	326.552	356.689	359.989	402.27	502.129	355.205	522.792	333.148	1.38797	1.34745	P47076
sp|Q04660|ERB1_YEAST	333.273	289.748	375.313	362.941	306.148	429.34	378.137	390.542	508.421	419.35	1.01304	1.34621	Q04660
sp|P09880|TRNL_YEAST	624.685	722.929	553.395	512.558	605.793	164.058	201.388	149.286	186.111	178.428	1.06072	1.346	P09880
sp|Q12515|PAR32_YEAST	419.357	472.93	376.671	441.787	481.111	308.706	377.838	270.663	427.163	320.698	1.08529	1.34559	Q12515
sp|Q12455|SPSY_YEAST	597.276	623.083	615.786	569.541	633.65	142.796	160.966	154.826	192.562	195.139	1.08055	1.34472	Q12455
sp|P11633|NHP6B_YEAST	610.325	582.818	494.754	503.296	651.975	218.666	247.471	166.314	227.429	180.744	1.18514	1.34426	P11633
sp|P38828|LSM12_YEAST	428.726	462.109	440.535	430.125	427.349	288.816	389.732	309.499	406.062	328.584	1.25193	1.34375	P38828
sp|P53899|CUZ1_YEAST	393.325	690.562	443.29	604.871	416.504	197.45	381.415	207.688	380.72	213.567	1.10025	1.34344	P53899
sp|P98160|PGBM_HUMAN	490.435	633.94	449.786	447.091	549.625	258.762	271.254	258.394	344.841	198.043	0.810976	1.3426	P98160
sp|P47018|MTC1_YEAST	460.698	443.409	610.918	642.187	451.125	234.911	293.457	227.19	320.1	276.265	1.29794	1.34035	P47018
sp|P38079|YRO2_YEAST	200.738	204.076	164.488	154.997	223.354	579.981	627.239	532.954	673.061	511.217	1.0638	1.34022	P38079
sp|Q99207|NOP14_YEAST	336.291	455.188	382.508	415.91	376.401	318.669	481.861	314.423	458.184	332.495	1.11714	1.34019	Q99207
sp|Q02555|RNT1_YEAST	481.511	410.514	468.582	497.66	490.948	243.161	345.927	236.96	336.801	292.145	1.66866	1.33829	Q02555
tr|H0YKC2|H0YKC2_HUMAN	397.274	323.228	526.6	462.358	314.953	319.044	441.082	360.706	423.746	296.566	1.69922	1.33799	H0YKC2
sp|P53900|PFD4_YEAST	650.558	784.181	570.954	561.138	592.143	141.717	166.934	128.522	168.931	138.76	0.977225	1.33741	P53900
sp|P40018|RSMB_YEAST	588.828	595.653	507.509	531.079	594.321	161.677	268.626	202.178	282.93	168.264	1.64246	1.3373	P40018
sp|Q12481|RRP36_YEAST	317.449	458.434	330.759	384.55	378.494	299.656	531.705	350.59	545.084	325.821	1.2287	1.33728	Q12481
sp|P05744|RL33A_YEAST	532.309	475.255	494.076	408.738	485.499	235.159	406.98	283.144	312.832	247.086	1.93842	1.33553	P05744
sp|Q03525|TMA23_YEAST	143.219	224.937	174.705	202.785	182.601	400.933	875.008	493.876	765.285	471.326	1.38957	1.33498	Q03525
sp|Q99216|PNO1_YEAST	466.978	527.978	477.909	475.282	465.927	236.012	404.318	257.436	341.238	237.154	1.5152	1.33285	Q99216
sp|P35527|K1C9_HUMAN	189.45	1107.02	221.26	424.545	478.303	265.756	289.362	183.618	469.56	332.433	0.186336	1.33277	P35527
sp|P53198|ERP6_YEAST	120.917	114.868	146.093	133.156	152.902	670.176	595.014	562.353	683.032	667.747	0.934602	1.33261	P53198
sp|Q06406|LSM6_YEAST	586.527	559.301	566.701	505.12	568.251	188.465	243.066	213.703	253.78	199.165	1.3525	1.33232	Q06406
sp|Q12306|SMT3_YEAST	677.813	702.528	573.18	594.281	668.533	117.198	168.059	135.484	187.134	119.608	1.38353	1.33219	Q12306
sp|P36120|DBP7_YEAST	451.38	516.967	509.381	502.688	460.095	258.757	333.882	243.826	319.941	261.258	1.12663	1.32964	P36120
sp|P53251|SLX9_YEAST	536.842	558.713	502.341	457.354	516.973	227.596	307.691	244.878	295.979	241.085	1.299	1.32757	P53251
sp|P40024|ARB1_YEAST	426.23	452.278	451.797	449.748	424.307	252.896	410.967	303.012	400.291	326.681	1.53145	1.32705	P40024
sp|Q3E757|RL11B_YEAST	513.482	447.883	495.635	437.582	455.438	260.7	373.023	292.547	342.655	273.554	1.64042	1.32667	Q3E757
sp|P05743|RL26A_YEAST	515.565	480.671	481.288	384.7	472.418	255.465	384.554	299.527	317.461	286.163	1.61459	1.32598	P05743
sp|P33399|LHP1_YEAST	643.184	725.029	642.833	602.776	577.946	127.599	130.421	139.594	173.532	150.098	0.906735	1.32573	P33399
sp|P43617|YFL5_YEAST	112.181	93.9407	92.4927	75.9652	101.204	704.379	589.406	649.055	706.652	712.044	0.999253	1.32561	P43617
sp|P26785|RL16B_YEAST	524.286	440.324	521.356	414.426	465.156	252.15	386.903	304.722	321.002	273.779	1.82701	1.32523	P26785
sp|Q08417|RSB1_YEAST	88.8747	62.0366	92.0326	104.858	78.3086	582.836	542.247	661.089	997.159	696.1	1.33285	1.32387	Q08417
sp|Q12034|SLF1_YEAST	412.846	556.014	387.461	525.055	414.291	246.222	410.252	241.479	433.209	291.444	1.23716	1.32386	Q12034
sp|P41896|T2FB_YEAST	383.535	374.086	448.557	481.98	523.111	347.014	346.3	264.499	376.105	320.259	1.02315	1.32335	P41896
sp|P25294|SIS1_YEAST	386.747	484.301	419.126	460.744	413.546	259.867	468.16	302.521	439.756	285.845	1.43865	1.32234	P25294
sp|P53128|MTHR2_YEAST	553.987	458.351	581.227	571.999	666.459	209.93	239.961	181.264	235.646	167.058	1.38155	1.32099	P53128
sp|P42262|GRIA2_HUMAN	492.636	34.4317	679.099	570.833	543.886	273.776	343.734	296.38	329.089	250.529	17.9636	1.32096	P42262
sp|P28789|HEM3_YEAST	674.028	640.788	651.435	565.038	674.79	103.471	161.806	138.206	158.177	127.462	1.6449	1.3195	P28789
sp|P38873|KOG1_YEAST	149.519	63.0017	246.484	244.323	118.091	671.849	392.955	582.695	760.756	606.624	1.38808	1.31713	P38873
sp|P06704|CDC31_YEAST	252.993	240.836	265.892	238.812	247.194	501.808	667.19	477.068	564.243	412.869	1.39668	1.31684	P06704
sp|P53254|UTP22_YEAST	344.773	327.097	360.453	365.438	346.809	353.156	574.815	389.861	520.247	313.66	1.71561	1.31624	P53254
sp|P38061|RL32_YEAST	519.295	467.575	506.398	428.03	463.227	236.619	387.654	293.02	325.81	260.128	1.81952	1.31548	P38061
sp|P12814|ACTN1_HUMAN	721.652	743.763	536.186	466.436	583.95	140.273	215.347	166.922	190.924	140.591	1.48956	1.31484	P12814
sp|P36091|DCW1_YEAST	98.4415	62.9167	107.091	80.4095	103.432	616.689	586.115	703.911	694.885	785.461	1.48706	1.31474	P36091
sp|P33324|YKJ1_YEAST	385.577	447.036	557.847	499.884	536.9	278.699	289.927	269.899	317.951	283.701	0.897268	1.31464	P33324
sp|Q12063|UPPS_YEAST	111.808	108.266	121.294	92.411	122.887	656.291	644.376	663.517	664.514	619.689	1.01397	1.31452	Q12063
sp|Q12125|GET4_YEAST	526.806	434.063	491.868	459.597	492.883	259.921	339.856	270.094	331.184	269.087	1.5869	1.31228	Q12125
sp|P37020|GEF1_YEAST	134.242	124.344	145.285	124.993	162.363	641.846	602.742	585.868	660.398	657.124	1.01382	1.31021	P37020
sp|Q05359|ERP1_YEAST	132.97	130.119	137.939	107.828	138.517	693.601	618.556	604.996	619.206	695.561	0.911346	1.3093	Q05359
sp|Q12465|RAX2_YEAST	125.29	118.997	157.304	145.248	157.348	659.479	515.321	578.915	699.021	688.599	0.82273	1.30769	Q12465
sp|P49775|HNT2_YEAST	593.754	603.113	620.694	613.065	567.264	188.45	186.858	149.716	193.187	159.273	0.976166	1.30641	P49775
sp|P32644|ECM32_YEAST	477.828	496.76	449.738	407.016	462.592	284.185	368.21	295.541	349.33	293.48	1.24629	1.30607	P32644
sp|Q12118|SGT2_YEAST	566.666	598.506	578.071	675.726	598.609	123.054	205.255	152.816	233.144	162.695	1.57927	1.30517	Q12118
sp|Q12099|FAL1_YEAST	520.992	470.797	468.814	439.657	512.929	206.037	434.301	280.15	342.893	218.915	2.33262	1.30513	Q12099
sp|P53174|PRM8_YEAST	142.022	160.975	157.393	133.897	156.007	644	558.938	615.052	682.344	597.712	0.765732	1.30408	P53174
sp|P38959|VPS41_YEAST	248.204	450.28	227.467	213.385	273.419	514.125	513.506	437.761	534.494	472.502	0.550557	1.30154	P38959
sp|P39715|ECM1_YEAST	543.915	635.176	527.842	550.704	565.548	176.778	233.609	188.523	255.994	218.72	1.13161	1.30152	P39715
sp|P0C0T4|RS25B_YEAST	519.014	503.359	481.183	451.741	465.743	243.116	366.263	283.121	345.642	271.539	1.55339	1.30039	P0C0T4
sp|Q12385|ICT1_YEAST	98.3835	299.942	126.339	270.293	141.772	392.696	1075.51	331.745	922.554	326.19	0.898342	1.29985	Q12385
sp|P41805|RL10_YEAST	499.145	461.204	474.167	399.044	458.867	252.07	413.144	300.576	328.757	274.446	1.77384	1.29966	P41805
sp|Q08096|RCL1_YEAST	426.912	495.643	421.838	446.17	445.358	266.289	482.405	287.494	394.829	295.567	1.56037	1.29845	Q08096
##sp|P37275|ZEB1_HUMAN	500.386	411.933	582.344	539.752	430.267	326.238	260.441	242.512	291.765	262.285	0.969734	1.29803	P37275
sp|P28707|SBA1_YEAST	689.465	83.4761	942.123	935.513	471.736	129.862	91.3745	132.316	170.325	147.236	5.81159	1.29636	P28707
sp|P40991|NOP2_YEAST	424.369	489.058	437.757	426.488	447.23	300.426	421.517	283.275	357.073	286.872	1.21748	1.29382	P40991
sp|P45818|ROK1_YEAST	384.321	408.213	383.113	398.066	396.838	296.584	514.934	335.761	451.295	317.135	1.6346	1.29361	P45818
sp|P38912|IF1A_YEAST	620.071	558.755	645.106	571.662	578.451	154.578	197.09	177.825	203.836	170.753	1.41494	1.29354	P38912
sp|Q9BY66|KDM5D_HUMAN	66.1291	18.283	36.0527	38.0489	48.637	710.69	568.187	719.569	980.504	689.849	2.89172	1.29114	Q9BY66
sp|P32523|PRP19_YEAST	496.826	443.092	594.26	535.865	511.779	238.951	244.137	243.29	283.092	272.259	1.14561	1.2904	P32523
sp|P04147|PABP_YEAST	487.19	422.174	461.277	421.394	430.799	279.786	426.133	311.212	366.738	291.505	1.75762	1.28995	P04147
sp|P23248|RS3A2_YEAST	517.512	508.743	441.88	394.196	436.515	251.927	414.246	287.387	330.675	253.206	1.67265	1.28981	P23248
sp|Q05775|EIF3J_YEAST	652.501	672.318	621.195	579.968	630.325	144.121	147.242	146.897	176.856	133.77	0.99154	1.28953	Q05775
sp|Q08965|BMS1_YEAST	402.648	449.281	421.969	454.806	413.717	284.832	488.792	291.967	405.571	285.775	1.53795	1.28881	Q08965
sp|P31115|PUS3_YEAST	504.269	561.56	525.447	426.692	474.339	224.763	321.544	276.575	288.864	283.095	1.28464	1.28616	P31115
sp|P53947|YNF8_YEAST	231.269	226.438	266.032	223.185	275.436	502.544	450.699	512.154	552.61	612.127	0.915968	1.28613	P53947
sp|P35183|AST1_YEAST	153.439	139.269	157.099	131.484	160.806	591.924	591.326	617.885	664.094	667.374	1.10063	1.28418	P35183
sp|Q02457|TBF1_YEAST	282.238	298.139	375.157	314.149	363.942	353.828	415.498	502.354	540.022	430.135	1.11166	1.28375	Q02457
sp|Q08268|MCH4_YEAST	417.866	461.092	516.867	363.034	536.67	272.597	336.354	306.639	276.288	379.428	1.11821	1.28282	Q08268
sp|P32784|GPT1_YEAST	87.8076	78.3546	108.582	86.9382	113.817	694.037	614.564	660.484	677.898	691.943	0.992322	1.28188	P32784
sp|P40339|RFC4_YEAST	450.895	455.277	520.973	537.572	562.629	236.063	244.131	262.046	346.61	262.109	1.02422	1.28187	P40339
sp|Q07362|PBP4_YEAST	397.94	413.668	415.177	424.842	433.87	287.582	404.715	346.719	454.643	333.14	1.3538	1.28144	Q07362
sp|P22855|MAN1_YEAST	271.95	241.878	226.961	213.253	241.411	572.228	593.969	385.626	463.915	634.601	1.16704	1.28034	P22855
sp|P33442|RS3A1_YEAST	463.407	488.508	454.668	416.246	446.337	264.308	431.285	305.882	358.515	282.662	1.54791	1.28026	P33442
sp|P0CX50|RL18B_YEAST	517.813	502.57	501.176	423.839	485.553	248.805	330.273	277.858	300.173	279.662	1.3677	1.27743	P0CX50
sp|Q07807|PUF3_YEAST	387.967	495.833	479.943	468.429	501.557	262.551	312.947	303.764	378.269	291.478	0.932645	1.27588	Q07807
sp|P32600|TOR2_YEAST	263.46	241.249	245.429	242.777	269.427	463.371	576.094	465.234	587.163	522.827	1.35773	1.27587	P32600
sp|Q12341|HAT1_YEAST	630.576	710.452	618.898	606.849	603.932	124.832	152.577	131.937	164.976	140.451	1.08484	1.27523	Q12341
sp|P11076|ARF1_YEAST	662.852	810.953	308.538	199.589	419.747	316.222	293.182	352.94	290.975	251.287	0.757819	1.27446	P11076
sp|P48415|SEC16_YEAST	462.977	417.335	484.501	433.716	450.762	307.47	331.569	301.677	344.113	305.42	1.19632	1.27423	P48415
sp|P15367|SEC11_YEAST	121.192	81.8264	99.966	74.1669	108.386	794.996	621.862	617.759	582.498	722.764	1.15854	1.27092	P15367
sp|Q03761|TAF12_YEAST	503.685	491.639	481.491	498.058	500.558	207.501	370.228	257.869	338.968	243.595	1.82794	1.27077	Q03761
sp|Q04225|RRB1_YEAST	467.982	304.28	567.797	543.912	428.089	286.466	329.174	300.34	365.531	265.799	1.76729	1.2705	Q04225
sp|P25441|RPC4_YEAST	378.106	421.292	364.946	340.252	400.867	386.909	378.894	338.866	400.959	347.008	0.878902	1.26911	P25441
sp|P36064|COXM1_YEAST	394.638	27.9615	435.669	514.906	343.109	446.637	381.32	361.934	542.583	381.648	12.0496	1.26843	P36064
sp|P0CX42|RL23B_YEAST	326.98	265.101	390.933	308.139	287.464	427.779	362.259	500.93	500.358	496.09	1.0445	1.26724	P0CX42
sp|P89886|TMA20_YEAST	599.93	645.683	567.176	506.473	577.598	153.95	231.062	193.29	218.678	188.16	1.39454	1.26694	P89886
sp|P38985|SRP14_YEAST	415.117	703.505	418.786	403.424	439.896	264.971	386.821	268.363	327.378	284.662	0.861418	1.26636	P38985
sp|P53327|SLH1_YEAST	478.431	492.817	443.572	415.048	505.474	253.347	380.18	280.504	332.264	306.289	1.45682	1.26593	P53327
sp|P25582|SPB1_YEAST	478.696	514.186	464.546	461.637	459.623	319.213	308.095	253.37	318.563	305.259	0.898553	1.26523	P25582
sp|Q00402|NUM1_YEAST	191.232	147.792	214.657	193.598	216.971	591.929	544.641	567.089	646.235	542.981	1.19056	1.26353	Q00402
sp|P40416|ATM1_YEAST	135.067	184.296	152.439	134.787	176.162	657.467	553.33	565.349	631.446	675.887	0.616797	1.26319	P40416
##sp|Q12500|AVL9_YEAST	492.746	582.225	487.504	561.358	512.628	215.936	299.679	240.984	350.295	157.647	1.17453	1.26236	Q12500
sp|P53261|PESC_YEAST	402.449	413.049	400.645	408.62	412.046	353.606	433.726	312.357	401.838	327.467	1.1951	1.26136	P53261
sp|Q99383|HRP1_YEAST	497.335	622.668	504.817	658.068	467.061	172.308	273.91	211.71	347.93	196.889	1.26968	1.26071	Q99383
sp|P48240|MTR3_YEAST	514.869	484.432	593.565	564.662	566.621	180.257	259.644	224.358	269.056	219.207	1.53091	1.26061	P48240
sp|P53966|KTR5_YEAST	213.725	293.531	171.416	151.883	237.351	631.063	455.724	497.666	555.644	639.241	0.525812	1.26009	P53966
sp|P53379|MKC7_YEAST	104.595	76.4328	112.311	83.4552	113.817	686.587	628.863	704.57	659.592	694.484	1.2534	1.25985	P53379
sp|Q12372|MMP1_YEAST	120.796	82.2532	120.085	119.294	118.723	692.245	532.977	594.667	743.558	721.01	1.1307	1.25867	Q12372
sp|P40850|MKT1_YEAST	448.57	400.851	456.145	409.061	411.456	317.378	391.362	339.379	383.06	341.782	1.3799	1.25863	P40850
sp|P25045|LCB1_YEAST	89.3034	102.272	110.318	82.3894	100.709	678.34	623.155	678.379	637.417	686.064	0.80216	1.25813	P25045
sp|P50076|ALG10_YEAST	67.007	143.301	83.6598	76.7426	120.165	695.032	612.012	677.075	780.517	602.523	0.411742	1.25668	P50076
sp|P36102|PAN3_YEAST	604.297	648.868	572.1	512.263	537.576	174.173	246.738	205.299	230.912	160.537	1.31931	1.25614	P36102
sp|P19659|MED15_YEAST	510.257	522.233	478.734	499.155	496.621	221.688	368.984	229.079	300.012	263.338	1.62626	1.25607	P19659
sp|P23797|GPI12_YEAST	78.6609	100.067	94.9662	92.135	92.8085	666.86	558.734	635.429	774.311	762.896	0.658627	1.25601	P23797
sp|P27680|COQ3_YEAST	220.085	242.745	225.423	229.341	245.553	528.627	550.607	459.455	587.029	578.57	0.944351	1.25584	P27680
sp|Q8TGU7|YB126_YEAST	75.5785	101.978	94.7377	87.3197	91.3396	744.438	698.826	672.957	778.551	502.455	0.695718	1.25519	Q8TGU7
sp|P49334|TOM22_YEAST	93.3147	91.3892	95.4411	79.1583	100.296	654.127	679.516	663.706	690.929	689.829	1.0607	1.25515	P49334
sp|P48234|NOL10_YEAST	415.162	516.509	472.304	513.134	408.201	312.235	359.167	294.074	400.713	318.666	0.924603	1.2542	P48234
sp|P38712|RRP3_YEAST	509.738	469.748	486.67	496.578	496.522	233.743	342.581	255.61	326.868	245.315	1.5904	1.25326	P38712
sp|P32591|SWI3_YEAST	501.737	513.716	502.861	472.498	517.162	235.82	315.367	256.256	301.112	266.13	1.30614	1.25055	P32591
sp|P0CX29|RS23A_YEAST	515.26	525.014	486.335	443.939	466.666	208.86	401.851	298.699	340.665	249.7	1.88827	1.24942	P0CX29
sp|Q12263|GIN4_YEAST	354.707	402.788	361.434	385.097	363.063	357.866	432.647	396.834	527.788	371.271	1.06465	1.24827	Q12263
sp|P40160|RIO2_YEAST	633.086	553.02	612.06	570.46	636.635	165.432	143.398	176.853	205.64	170.835	0.992308	1.24757	P40160
sp|Q92317|NCB2_YEAST	556.701	489.772	443.979	411.587	461.602	272.278	215.386	367.518	424.97	241.731	0.89915	1.24733	Q92317
sp|Q08444|NOB1_YEAST	546.449	286.18	601.27	587.514	451.338	227.38	299.558	275.07	335.181	243.121	2.51558	1.24706	Q08444
sp|P25385|BOS1_YEAST	145.988	169.579	160.546	127.135	162.104	641.619	599.18	580.897	573.474	640.594	0.80394	1.24666	P25385
sp|Q06287|NEP1_YEAST	447.865	476.227	420.583	414.448	440.946	278.314	442.761	294.743	361.841	284.77	1.49613	1.24582	Q06287
##sp|Q8N614|TM156_HUMAN	541.961	547.466	479.468	453.106	550.728	229.727	304.009	246.612	290.146	243.906	1.31004	1.24498	Q8N614
sp|Q08921|TCO89_YEAST	439.308	80.0048	528.26	511.835	385.161	372.54	256.361	367.347	443.085	436.762	3.7786	1.24488	Q08921
sp|P26321|RL5_YEAST	495.103	431.152	499.051	470.745	454.039	259.4	367.24	280.629	329.491	257.943	1.62572	1.24471	P26321
sp|Q08492|BUD21_YEAST	319.156	413.635	337.754	389.055	323.537	352.532	520.843	364.43	522.082	358.607	1.13997	1.24369	Q08492
sp|Q08208|NOP12_YEAST	356.88	441.708	370.224	388.8	382.607	306.213	534.133	352.429	460.297	312.89	1.40933	1.24367	Q08208
sp|P43639|CSK2B_YEAST	377.02	384.454	392.059	403.895	383.583	332.168	439.502	359.186	460.07	352.123	1.29755	1.24333	P43639
sp|P0CX40|RS8B_YEAST	525.061	394.337	531.184	515	496.087	228.429	328.325	278.435	335.332	245.806	1.9138	1.24219	P0CX40
sp|Q02196|KAPS_YEAST	539.735	555.927	677.303	645.457	838.187	111.507	92.5059	100.985	119.53	186.642	0.805434	1.24203	Q02196
sp|P26754|RFA2_YEAST	439.726	425.975	467.302	500.907	467.001	282.61	302.384	311.967	415.178	290.081	1.10451	1.24156	P26754
sp|P53200|EFM5_YEAST	626.52	502.02	690.588	652.655	640.285	130.588	179.418	141.261	165.552	132.751	1.71465	1.24007	P53200
sp|P39961|YE14_YEAST	71.6084	68.1996	61.6438	79.6367	77.451	649.82	553.263	603.339	966.214	766.563	0.893965	1.23962	P39961
sp|P40482|SEC24_YEAST	435.29	404.979	444.12	421.858	411.336	323.382	383.103	304.301	358.182	382.792	1.27334	1.23918	P40482
sp|Q04410|GRH1_YEAST	439.524	477.558	405.285	354.497	437.887	369.37	346.154	316.243	342.739	378.557	0.862511	1.23905	Q04410
sp|Q06147|LCB5_YEAST	266.299	282.945	248.666	266.525	265.518	394.145	577.556	481.028	638.507	479.302	1.37913	1.23844	Q06147
sp|P12866|STE6_YEAST	203.524	179.068	115.241	108.142	149.815	616.86	590.671	586.702	681.78	628.698	1.08832	1.23833	P12866
sp|P20484|MAK11_YEAST	467.127	311.099	540.034	491.454	416.689	339.029	335.27	281.895	317.613	341.444	1.48489	1.23808	P20484
sp|Q03028|ODC1_YEAST	148.971	130.627	129.687	119.014	149.374	792.848	678.089	498.711	565.823	603.178	0.975365	1.23632	Q03028
sp|P53617|NRD1_YEAST	474.754	623.013	468.455	678.512	519.288	144.691	323.52	203.993	364.657	178.998	1.70385	1.23418	P53617
sp|Q12339|UTP23_YEAST	464.592	508.853	378.077	468.798	468.269	286.452	376.349	272.598	417.104	259.719	1.19955	1.23401	Q12339
sp|P53139|YGK8_YEAST	135.655	146.053	127.408	129.906	129.946	675.777	536.652	583.182	733.332	656.535	0.737586	1.23328	P53139
sp|D6VTK4|STE2_YEAST	122.197	93.8052	122.132	101.983	120.967	688.964	555.691	673.259	692.829	642.711	1.05068	1.23239	D6VTK4
sp|Q3E747|YL363_YEAST	453.134	520.372	513.486	467.319	538.721	221.648	392.825	267.246	299.701	213.965	1.54329	1.23223	Q3E747
tr|Q5QPR4|Q5QPR4_HUMAN	115.735	108.257	116.705	100.403	127.385	674.299	564.496	632.732	670.481	725.314	0.894992	1.23171	Q5QPR4
sp|P0C2H8|RL31A_YEAST	503.32	456.274	496.346	410.237	473.365	258.548	358.152	305.039	310.425	282.053	1.52808	1.23126	P0C2H8
sp|Q04500|UTP14_YEAST	458.954	460.431	466.198	524.199	446.118	248.244	394.224	257.241	355.95	252.42	1.58296	1.23062	Q04500
sp|P26784|RL16A_YEAST	498.886	560.019	486.271	405.643	479.014	263.564	383.71	294.803	302.493	273.542	1.29693	1.23003	P26784
sp|P00127|QCR6_YEAST	113.745	96.4005	133.933	123.583	118.226	628.434	569.618	676.47	767.345	627.372	1.06949	1.22934	P00127
sp|P40483|YIK8_YEAST	203.527	246.457	214.426	214.707	208.273	538.954	527.007	530.485	652.759	520.842	0.807506	1.22888	P40483
sp|P53969|SAM50_YEAST	110.907	154.772	112.065	103.198	120.759	654.332	622.789	607.244	686.844	680.055	0.682038	1.22827	P53969
sp|P53318|COQ6_YEAST	215.421	189.641	309.182	235.139	244.528	465.845	555.048	542.49	506.547	581.292	1.35346	1.22777	P53318
sp|P34162|MED20_YEAST	485.74	476.828	473.015	433.744	501.271	278.186	301.013	274.832	309.323	339.009	1.10228	1.2274	P34162
sp|P54003|SUR7_YEAST	81.629	212.669	87.6498	70.7798	122.996	737.435	578.437	668.808	662.358	612.877	0.301074	1.2264	P54003
sp|P25296|CANB_YEAST	674.599	668.64	531.673	544.597	492.053	189.953	235.004	177.267	222.51	155.506	1.2482	1.22544	P25296
sp|Q9P1Y5|CAMP3_HUMAN	685.303	892.721	475.902	480.084	769.359	105.632	212.831	95.0383	117.434	89.9225	1.5467	1.22489	Q9P1Y5
sp|Q12403|ERP3_YEAST	168.23	82.0156	68.6574	47.226	98.6838	762.748	706.465	633.507	533.577	699.576	1.89984	1.22448	Q12403
sp|P39935|IF4F1_YEAST	473.366	505.224	476.584	449.982	461.742	252.663	360.457	282.461	326.386	279.468	1.33667	1.22382	P39935
sp|Q06512|NOC4_YEAST	299.049	28.9592	500.252	516.335	195.475	437.77	355.175	459.064	579.367	455.244	8.37822	1.22275	Q06512
sp|P38344|REI1_YEAST	571.361	651.889	576.311	557.581	566.506	159.307	239.697	182.401	215.75	178.674	1.31876	1.22257	P38344
sp|P40219|OSW5_YEAST	154.191	186.292	155.078	126.023	183.094	628.178	620.968	617.811	613.679	558.069	0.81818	1.22232	P40219
sp|P10823|GPA2_YEAST	183.126	196.293	186.344	159.688	180.19	594.467	605	561.939	588.226	567.093	0.949451	1.22152	P10823
sp|P22936|APN1_YEAST	500.692	453.003	537.905	556.744	451.633	263.981	307.298	261.039	329.865	214.784	1.28664	1.2209	P22936
sp|P33755|NPL4_YEAST	287.529	306.372	248.426	297.021	316.674	393.694	593.967	413.494	603.434	434.596	1.41591	1.22059	P33755
sp|P53927|NOP15_YEAST	401.693	437.355	340.703	370.074	422.099	301.495	531.825	323.506	428.776	342.018	1.62012	1.22022	P53927
sp|P53950|VAC7_YEAST	85.1864	84.5007	87.6618	101.434	95.7472	643.434	621.174	610.461	861.471	689.881	0.973239	1.21958	P53950
sp|P05756|RS13_YEAST	559.069	469.254	537.056	474.197	451.216	238.062	346.232	297.016	319.807	257.772	1.73275	1.21947	P05756
sp|Q03769|ENT5_YEAST	470.974	455.593	451.667	458.662	450.846	267.409	369.821	288.525	357.275	320.928	1.42967	1.2194	Q03769
sp|Q03532|HAS1_YEAST	390.647	393.684	385.708	403.609	377.87	347.265	474.603	334.553	426.87	340.053	1.35614	1.21935	Q03532
##sp|Q5THK1|PR14L_HUMAN	483.918	587.32	500.646	494.414	471.556	231.969	316.76	249.58	300.218	255.205	1.12512	1.21805	Q5THK1
sp|Q02205|MEH1_YEAST	160.718	189.003	171.883	158.176	173.336	643.562	602.782	513.959	576.055	652.224	0.796461	1.21795	Q02205
sp|P25628|ARE1_YEAST	90.9867	151.668	96.2898	85.8681	147.599	707.389	689.412	602.193	653.916	617.256	0.584659	1.21769	P25628
sp|Q03897|WDR59_YEAST	319.068	424.22	293.496	310.688	348.556	416.705	484.735	333.799	430.027	519.253	0.874921	1.21699	Q03897
sp|P36105|RL14A_YEAST	482.304	279.24	603.052	496.461	339.03	286.057	248.024	352.058	352.392	357.333	1.49756	1.21586	P36105
sp|P32832|RSC7_YEAST	457.195	545.336	422.169	473.869	417.743	230.922	366.059	302.918	413.17	278.953	1.329	1.21515	P32832
sp|P12611|WHI2_YEAST	333.006	146.427	288.919	249.363	385.422	384.18	425.032	390.434	409.055	383.352	2.51604	1.21389	P12611
sp|P41056|RL33B_YEAST	490.157	431.528	503.98	447.001	454.629	246.458	379.594	301.087	324.138	296.334	1.74945	1.21379	P41056
sp|Q04493|PFD5_YEAST	654.676	812.893	639.826	659.566	672.553	73.8401	96.1992	89.1949	111.557	91.9964	1.04923	1.21328	Q04493
sp|P32916|SRPR_YEAST	129.065	125.373	117.686	90.6679	121.912	681.251	638.651	646.856	604.393	640.056	0.965077	1.21278	P32916
sp|P41734|IAH1_YEAST	636.5	525.915	637.491	653.537	652.895	152.172	135.422	132.186	164.275	173.383	1.07705	1.21224	P41734
sp|Q06451|TPO3_YEAST	143.767	134.091	176.274	146.872	81.2459	536.255	560.78	638.3	644.646	789.176	1.1212	1.21212	Q06451
sp|P41818|GLC8_YEAST	618.1	902.567	631.956	725.996	673.482	58.4316	79.2233	59.6641	83.0794	77.2115	0.928505	1.21208	P41818
sp|P40207|YM17_YEAST	170.882	201.187	173.287	145.646	202.29	573.465	594.784	584.598	595.555	609.589	0.880944	1.21208	P40207
sp|P41814|TRM6_YEAST	535.521	609.918	536.467	592.85	540.081	164.829	231.254	208.715	279.504	185.873	1.23186	1.2118	P41814
sp|Q12000|TMA46_YEAST	352.928	358.913	428.875	365.499	370.529	332.722	463.491	369.66	381.48	405.824	1.3698	1.21091	Q12000
sp|P53316|YG5B_YEAST	342.226	353.42	341.878	348.889	381.209	383.946	420.322	412.84	509.863	384.733	1.06007	1.2102	P53316
sp|P38875|GPI16_YEAST	183.663	141.876	208.739	174.012	142.53	654.239	355.131	607.024	612.33	739.385	0.702694	1.21005	P38875
sp|P38374|YSY6_YEAST	84.1928	89.7131	106.923	78.8819	77.9469	777.313	587.314	731.76	652.972	618.718	0.709077	1.20954	P38374
sp|P19146|ARF2_YEAST	627.556	832.587	345.323	268.954	432.629	301.563	279.167	299.881	282.491	312.604	0.697763	1.20949	P19146
sp|P0CX85|RL35B_YEAST	564.948	530.86	551.151	434.156	477.109	199.125	388.058	258.523	246.288	232.439	2.07396	1.2094	P0CX85
sp|P28495|CAPZA_YEAST	589.034	571.462	653.159	624.811	587.987	154.646	164.313	176.445	204.021	156.584	1.09518	1.20874	P28495
sp|P40005|PFD2_YEAST	648.563	779.135	640.18	643.662	659.851	92.7436	104.366	115.377	140.106	93.586	0.93673	1.20776	P40005
sp|P53390|MEP3_YEAST	106.503	164.462	86.8115	78.762	117.852	756.303	619.075	608.92	666.363	629.948	0.530084	1.20618	P53390
sp|P07273|TFS2_YEAST	532.521	553.352	536.088	507.546	539.79	222.749	270.467	228.089	260.229	229.009	1.16851	1.20507	P07273
##sp|Q7Z3C6|ATG9A_HUMAN	704.084	809.917	449.522	334.263	489.472	171.395	233.84	251.9	225.723	245.124	1.18605	1.20506	Q7Z3C6
sp|P25360|PHO87_YEAST	165.215	199.749	186.539	160.612	210.406	597.477	646.236	563.749	584.874	533.891	0.894611	1.20495	P25360
sp|P53010|PAN2_YEAST	507.145	534.33	545.434	515.007	518.379	197.212	322.126	255.546	290.595	201.007	1.5503	1.20433	P53010
sp|P22215|SLY41_YEAST	119.14	94.1744	124.304	106.975	135.153	727.432	494.34	641.494	664.48	712.405	0.859725	1.20363	P22215
sp|P43577|GNA1_YEAST	641.566	639.945	677.58	622.875	706.986	99.7922	113.405	122.892	135.971	119.81	1.13929	1.2036	P43577
sp|Q06010|STE23_YEAST	475.748	492.477	492.135	461.092	515.548	288.607	319.245	259.6	292.738	273.626	1.06858	1.20357	Q06010
sp|Q00618|PGTA_YEAST	562.577	630.957	556.053	744.095	529.362	65.6391	348.943	132.201	212.899	124.527	4.73995	1.20345	Q00618
sp|Q08162|RRP44_YEAST	556.324	654.011	507.258	510.926	529.823	188.781	286.063	202.418	245.332	193.077	1.28898	1.20331	Q08162
sp|P40496|RT25_YEAST	295.346	421.834	441.313	398.796	428.882	460.171	408.466	284.64	309.407	395.837	0.62148	1.2029	P40496
sp|P53280|CF130_YEAST	360.248	331.57	311.985	254.115	291.567	413.428	560.041	465.884	456.065	421.589	1.47179	1.20185	P53280
sp|P06787|CALM_YEAST	542.783	554.323	522.59	501.639	523.507	246.642	250.429	258.129	297.668	228.355	0.994216	1.20134	P06787
sp|P22579|SIN3_YEAST	608.805	588.786	585.543	608.767	661.774	125.844	192.825	157.612	196.741	158.581	1.58436	1.20064	P22579
sp|Q06511|RRP15_YEAST	482.247	570.718	462.472	458.953	489.842	295.017	301.553	254.273	302.905	298.348	0.863704	1.20039	Q06511
sp|P39729|RBG1_YEAST	380.782	412.909	378.958	371.92	375.738	312.322	501.703	357.545	421.211	368.144	1.48138	1.20035	P39729
sp|Q06063|DUS4_YEAST	551.545	597.995	554.85	553.916	591.658	192.902	230.251	192.873	231.089	186.575	1.1009	1.20016	Q06063
sp|P53064|RTF1_YEAST	595.105	493.055	540.159	620.583	582.506	138.129	233.381	160.029	220.626	176.907	2.03929	1.19999	P53064
sp|Q03305|RMT2_YEAST	694.9	747.023	525.014	581.925	652.314	74.4358	177.769	142.812	189.806	127.426	2.22159	1.19909	Q03305
sp|P53281|LSB1_YEAST	554.488	774.432	445.183	569.617	540.112	180.879	206.25	169.647	260.272	214.092	0.816421	1.19905	P53281
sp|P14120|RL30_YEAST	521.859	452.181	523.292	449.432	481.538	249.835	327.472	277.485	285.536	244.846	1.51273	1.19812	P14120
sp|P18759|SEC18_YEAST	364.512	381.452	361.565	353.791	364.849	311.826	490.206	362.989	425.348	426.84	1.50224	1.19754	P18759
sp|P47019|ALB1_YEAST	571.929	566.975	540.751	510.934	542.792	208.194	260.791	216.103	244.484	217.922	1.26358	1.19735	P47019
sp|Q03161|YMY9_YEAST	443.96	434.717	516.532	460.933	415.868	332.598	249.042	325.574	347.734	339.758	0.764696	1.1969	Q03161
sp|Q99288|DET1_YEAST	563.197	617.441	551.064	550.451	615.111	158.485	249.272	189.709	226.738	170.616	1.43467	1.19652	Q99288
sp|P39704|ERP2_YEAST	117.171	116.846	155.603	126.073	123.8	654.519	613.315	652.362	631.983	638.975	0.939655	1.19567	P39704
sp|Q49AJ0|F135B_HUMAN	729.891	938.125	577.775	570.594	718.636	65.9991	79.915	85.6492	101.134	53.0762	0.942079	1.19565	Q49AJ0
sp|P40157|VID27_YEAST	292.104	325.829	314.719	286.07	338.104	394.631	502.057	472.309	513.22	437.189	1.14054	1.19544	P40157
sp|P53241|VHT1_YEAST	115.928	113.416	108.135	107.61	143.027	677.666	505.116	651.827	775.154	653.851	0.761886	1.19501	P53241
sp|P36088|FRMSR_YEAST	643.242	631.542	671.833	623.722	689.882	100.201	122.323	130.246	144.489	123.586	1.2434	1.19492	P36088
sp|P24783|DBP2_YEAST	545.158	555.299	560.17	641.783	507.967	163.339	259.604	205.346	281.067	181.204	1.56034	1.19469	P24783
sp|Q05636|RRP45_YEAST	564.268	580.576	509.206	525.016	550.873	180.92	291.027	217.015	267.292	192.054	1.56341	1.19459	Q05636
sp|P21801|SDHB_YEAST	110.413	95.0776	96.8363	94.9792	118.126	710.864	643.729	588.291	689.135	694.719	1.05162	1.19432	P21801
sp|P43620|RMD8_YEAST	89.1017	77.7383	127.82	113.991	133.098	738.664	644.412	577.316	614.747	713.304	0.999925	1.19402	P43620
sp|P04264|K2C1_HUMAN	266.415	868.751	342.316	458.578	540.081	252.851	359.326	236.311	377.945	264.405	0.435801	1.19388	P04264
sp|Q04373|PUF6_YEAST	381.954	445.302	428.493	441.364	388.433	368.951	391.869	326.552	401.542	363.786	0.91102	1.19378	Q04373
sp|P11075|SEC7_YEAST	475.116	483.49	523.65	474.966	500.895	312.809	224.672	296.146	320.603	332.108	0.705802	1.19355	P11075
sp|P53256|RRP46_YEAST	525.755	582.601	543.691	531.846	523.651	194.251	313.426	220.352	257.133	196.057	1.45607	1.19291	P53256
sp|P38869|SVP26_YEAST	135.285	111.019	161.319	140.18	151.231	680.885	545.472	620.411	643.09	638.414	0.976227	1.19286	P38869
##sp|Q6ZW49|PAXI1_HUMAN	740.642	800.595	551.605	480.148	495.16	177.41	184.212	149.838	155.55	163.414	0.960584	1.19262	Q6ZW49
sp|P0CX43|RL1A_YEAST	524.92	436.585	514.211	417.77	489.103	266.517	350.409	299.999	290.192	275.722	1.58079	1.19061	P0CX43
sp|P0CX38|RS6B_YEAST	500.307	522.687	477.93	440.604	473.017	236.27	393.967	280.604	307.662	255.664	1.59605	1.18931	P0CX38
sp|P40452|COA1_YEAST	92.096	109.041	87.3347	74.3881	92.6567	666.905	642.776	674.18	682.922	718.382	0.814045	1.18926	P40452
sp|P41058|RS29B_YEAST	562.969	611.36	480.05	449.089	589.842	202.761	296.378	235.542	261.761	204.691	1.34601	1.18793	P41058
sp|P38112|MAK5_YEAST	516.346	544.191	526.451	523.987	520.195	242.755	294.632	244.092	288.516	231.4	1.15159	1.18756	P38112
sp|Q08215|PEX15_YEAST	160.784	97.3399	119.478	133.725	155.655	654.297	699.943	568.02	754.702	521.207	1.76702	1.18711	Q08215
sp|Q03281|HEH2_YEAST	100.112	99.3602	107.392	96.5179	101.873	715.656	634.131	620.993	662.528	668.128	0.89279	1.18708	Q03281
sp|Q12434|GDIR_YEAST	645.813	444.201	641.504	593.641	698.41	161.633	157.362	160.234	175.986	176.897	1.41545	1.18686	Q12434
sp|P53221|RL26B_YEAST	515.868	379.292	463.938	448.457	480.546	273.019	382.933	294.294	337.616	292.689	1.90764	1.18681	P53221
sp|P53336|YG5X_YEAST	497.162	425.358	599.459	515.315	623.134	238.52	205.997	221.458	225.747	300.024	1.00944	1.18581	P53336
sp|P53045|MSMO_YEAST	104.286	135.589	96.3255	98.8164	102.731	671.766	640.854	652.883	794.13	568.21	0.733746	1.18568	P53045
sp|Q12159|YRA1_YEAST	569.485	590.287	558.921	574.201	572.11	174.131	260.94	190.497	231.915	188.199	1.44571	1.18503	Q12159
sp|Q3E830|YC075_YEAST	160.454	168.517	165.412	157.72	166.629	623.545	614.914	544.921	615.099	630.462	0.938972	1.18383	Q3E830
sp|Q02785|PDR12_YEAST	106.809	146.763	72.7214	121.394	90.0367	665.706	980.028	429.719	849.174	457.856	1.07139	1.1838	Q02785
sp|Q12241|VAM3_YEAST	242.841	247.888	245.281	220.477	257.094	537.311	528.272	497.078	528.513	545.371	0.963161	1.18286	Q12241
sp|P39939|RS26B_YEAST	539.357	602.867	526.795	416.982	462.542	207.496	383.063	276.263	258.47	217.834	1.65164	1.18198	P39939
sp|P22216|RAD53_YEAST	409.953	253.569	555.516	469.285	422.914	344.006	297.051	350.134	349.344	381.018	1.39606	1.18108	P22216
sp|P53743|ESF2_YEAST	455.926	582.16	502.994	489.242	487.214	245.577	331.068	248.969	285.987	258.097	1.0558	1.18098	P53743
sp|Q08962|NIP7_YEAST	455.133	462.501	509.349	494.185	445.562	307.434	356.993	265.359	303.982	289.216	1.1427	1.1807	Q08962
sp|P06786|TOP2_YEAST	369.217	439.125	395.709	391.601	430.146	303.266	459.569	370.067	432.234	299.396	1.27415	1.18024	P06786
sp|Q3E7X9|RS28A_YEAST	559.711	612.104	526.104	475.08	529.273	192.176	288.827	242.473	258.385	211.565	1.37429	1.18007	Q3E7X9
sp|Q12091|DAP1_YEAST	443.996	502.24	449.493	496.217	438.741	269.947	335.072	277.74	361.589	311.616	1.09731	1.17931	Q12091
sp|P50105|TAF4_YEAST	557.172	450.278	682.68	720.437	735.055	124.936	176.757	132.532	164.761	113.811	1.75065	1.17803	P50105
sp|P40035|PIC2_YEAST	96.1832	99.0812	109.414	97.8682	101.016	761.072	631.322	595.792	627.682	714.551	0.805255	1.17781	P40035
sp|P33421|SDH3_YEAST	170.663	184.762	147.69	120.403	167.4	634.425	661.411	585.578	562.251	602.804	0.962982	1.17777	P33421
sp|Q12082|YD157_YEAST	91.486	92.5495	89.4469	89.1181	97.5799	645.153	701.627	637.758	748.309	667.725	1.07504	1.17767	Q12082
sp|P23594|PP2A1_YEAST	535.551	514.167	617.739	540.13	645.474	199.846	236.036	188.167	193.54	194.969	1.23021	1.17634	P23594
sp|P53266|SHY1_YEAST	349.82	365.698	408.605	402.095	411.658	407.769	235.793	374.458	433.367	464.534	0.553145	1.17605	P53266
sp|P61830|H3_YEAST	167.694	165.955	173.607	153.431	198.563	436.254	714.725	716.61	744.074	448.866	1.65549	1.17486	P61830
sp|P40517|YRB2_YEAST	643.967	680.398	607.609	585.424	634.622	126.258	133.207	146.424	165.62	137.01	0.998545	1.17397	P40517
sp|P38996|NAB3_YEAST	527.141	530.428	556.197	621.305	561.854	172.752	233.943	216.366	283.735	194.341	1.34582	1.17394	P38996
sp|P45976|FIP1_YEAST	455.54	553.471	609.334	556.945	570.891	177.144	245.494	251.19	269.188	193.399	1.14064	1.17245	P45976
sp|Q01802|AATM_YEAST	457.932	465.537	523.361	431.362	452.527	270.289	370.596	327.177	316.144	256.097	1.34871	1.17236	Q01802
sp|P53874|UBP10_YEAST	433.425	535.395	416.765	416.236	442.617	295.449	353.93	307.817	360.258	292.915	0.969783	1.17185	P53874
sp|P25656|CDC50_YEAST	128.074	108.543	165.904	134.965	129.999	602.045	559.473	699.709	666.25	641.928	1.0965	1.17046	P25656
sp|P52553|PFD6_YEAST	811.276	934.271	550.494	520.487	559.353	66.5767	127.453	114.82	127.066	113.828	1.66236	1.17045	P52553
sp|Q3E764|TMA7_YEAST	590.234	580.059	547.1	497.754	570.481	206.574	260.447	229.588	244.169	155.242	1.28291	1.16894	Q3E764
sp|Q04347|BUD22_YEAST	325.593	200.35	415.729	502.064	261.69	469.773	321.484	400.024	564.563	384.803	1.11213	1.16864	Q04347
sp|P53905|LSM7_YEAST	559.17	626.976	522.834	503.272	538.393	196.109	272.781	218.822	245.905	207.056	1.24053	1.16745	P53905
sp|P38738|OCA5_YEAST	580.022	614.914	593.67	570.997	559.502	181.941	202.199	191.101	214.553	172.125	1.04828	1.1673	P38738
sp|Q06689|YL413_YEAST	117.684	28.9875	111.438	116.381	99.1026	714.669	457.718	653.671	796.579	702.552	2.60016	1.16687	Q06689
sp|P27515|URK1_YEAST	620.722	601.647	596.422	634.644	583.485	126.731	253.522	149.711	185.875	133.392	2.0639	1.16678	P27515
sp|P0CX23|RL20A_YEAST	499.787	448.583	557.4	498.646	443.56	266.401	320.341	297.37	310.147	271.282	1.33973	1.16585	P0CX23
sp|P40476|PRM5_YEAST	250.461	315.559	270.529	284.035	299.818	403.41	612.241	452.618	553.897	447.262	1.20458	1.16557	P40476
sp|Q12690|RL13A_YEAST	525.411	507.632	492.095	421.628	528.191	227.642	315.613	282.485	282.057	260.011	1.435	1.16536	Q12690
sp|P51402|RL37B_YEAST	529.086	503.094	566.042	458.109	425.854	259.828	333.545	310.283	292.624	251.803	1.35003	1.16528	P51402
sp|P25043|PSB2_YEAST	638.569	709.775	625.576	587.987	583.208	89.3514	213.26	157.502	172.386	123.324	2.14731	1.16447	P25043
sp|P38770|BRL1_YEAST	46.9912	36.028	99.5502	100.326	88.9723	616.339	607.847	695.142	815.582	754.692	1.28633	1.16419	P38770
sp|P53137|CUE3_YEAST	358.929	379.308	418.039	367.201	474.019	326.898	442.841	352.014	359.955	388.05	1.2819	1.16413	P53137
sp|P39105|PLB1_YEAST	151.64	227.846	152.368	133.973	192.043	643.867	484.31	560.961	573.56	650.279	0.50061	1.16285	P39105
sp|P40347|PPAL_YEAST	653.159	687.509	661.168	615.204	685.574	97.6602	98.1414	125.913	136.221	125.778	0.954718	1.1627	P40347
sp|Q04066|KFA_YEAST	662.186	691.047	638.492	548.462	679.733	128.766	146.055	133.044	132.843	125.186	1.08689	1.16239	Q04066
sp|Q01855|RS15_YEAST	519.769	459.689	540.694	481.945	508.358	229.515	349.083	273.664	283.295	257.172	1.71974	1.16138	Q01855
sp|P32803|EMP24_YEAST	157.893	112.413	110.101	91.8847	101.173	702.613	579.183	660.686	640.315	667.351	1.15784	1.16131	P32803
sp|P33314|BUD2_YEAST	442.48	446.15	526.29	439.842	457.022	237.098	341.757	327.357	317.716	337.082	1.42956	1.16131	P33314
sp|P40487|DPH1_YEAST	525.016	447.327	683.839	642.925	620.589	154.432	189.391	187.917	204.853	202.852	1.43936	1.1595	P40487
sp|Q04958|NTE1_YEAST	117.951	119.668	120.783	110.182	134.867	640.832	609.232	621.538	657.394	676.623	0.937054	1.15945	Q04958
sp|P34167|IF4B_YEAST	648.963	551.54	666.605	609.144	638.771	132.654	134.54	156.502	165.807	158.216	1.19336	1.1594	P34167
sp|Q06440|CORO_YEAST	609.563	588.774	586.147	560.58	560.773	201.028	154.513	208.745	231.417	144.43	0.795755	1.15917	Q06440
sp|P53063|DXO_YEAST	635.152	538.956	545.779	545.311	633.937	168.379	228.493	181.762	210.229	188.763	1.59922	1.15761	P53063
sp|P00424|COX5A_YEAST	90.535	0	92.4386	101.223	53.2247	721.425	444.254	693.111	877.763	755.47	#DIV/0!	1.15651	P00424
sp|P53946|ARP5_YEAST	420.789	334.616	471.741	437.988	442.012	316.816	383.695	354.699	380.682	316.583	1.52299	1.15596	P53946
sp|P39012|GAA1_YEAST	121.947	95.0224	111.037	86.8333	102.324	732.882	596.502	714.931	646.159	688.969	1.04454	1.15573	P39012
sp|P40563|AIM21_YEAST	1221.98	485.878	1054.52	472.588	279.267	91.2896	67.0826	80.414	41.648	43.0483	1.84811	1.15567	P40563
sp|Q04370|PEX12_YEAST	103.79	123.44	113.658	103.482	96.4713	700.371	560.74	655.013	689.115	688.424	0.673185	1.15552	Q04370
sp|P38203|LSM2_YEAST	601.109	620.581	475.254	490.896	508.17	193.782	301.003	235.045	280.371	192.114	1.50457	1.15483	P38203
sp|P38225|FAT1_YEAST	115.677	92.6402	128.828	117.796	120.67	667.975	575.442	650.754	686.744	661.932	1.07569	1.15414	P38225
sp|P36149|BET3_YEAST	375.892	392.39	425.04	401.426	333.588	373.608	404.356	376.701	410.587	370.769	1.03679	1.15407	P36149
sp|Q08581|SLK19_YEAST	596.301	801.453	661.768	596.721	597.548	98.7292	101.225	137.018	142.469	167.519	0.762834	1.15312	Q08581
sp|P22202|HSP74_YEAST	257.002	865.582	270.97	790.347	325.434	159.253	499.756	140.641	472.71	166.314	0.931749	1.15235	P22202
sp|P25372|TRX3_YEAST	545.179	520.543	637.608	585.852	620.211	200.762	186.362	202.333	214.121	150.931	0.972206	1.15175	P25372
sp|P80967|TOM5_YEAST	176.676	97.397	162.746	160.609	116.008	592.923	476.486	651.447	740.414	676.428	1.45775	1.15169	P80967
sp|P15731|UBC4_YEAST	659.767	48.8814	834.151	908.001	451.3	157.213	107.423	192.125	240.741	197.562	9.22264	1.15113	P15731
sp|P38172|MRX3_YEAST	139.8	120.955	113.477	105.888	135.012	732.127	631.01	568.122	610.14	668.865	0.996163	1.15093	P38172
sp|P40070|LSM4_YEAST	504.033	513.471	521.464	516.329	538.717	230.085	307.367	262.502	298.992	243.127	1.31133	1.15033	P40070
sp|P50109|PSP2_YEAST	467.132	518.884	475.64	519.214	487.113	244.211	317.08	247.897	311.261	295.149	1.16889	1.15023	P50109
sp|P40438|VTH1_YEAST	152.753	157.058	180.245	159.733	196.317	528.411	544.283	587.997	598.913	669.649	1.0018	1.14936	P40438
sp|P21304|PWP1_YEAST	438.119	391.93	415.84	475.309	411.28	281.274	467.268	313.935	412.15	275.731	1.85703	1.14859	P21304
sp|P32598|PP12_YEAST	485.385	429.655	480.956	524.171	446.254	250.89	375.752	290.643	363.757	249.722	1.69194	1.14837	P32598
sp|P00427|COX6_YEAST	157.871	142.29	140.526	152.339	181.545	553.314	589.692	570.689	710.114	631.367	1.18245	1.14782	P00427
sp|Q03880|PKR1_YEAST	81.8329	92.058	90.0749	77.4245	84.7612	742.843	657.72	658.065	649.084	688.119	0.787064	1.14751	Q03880
sp|P48510|DSK2_YEAST	600.365	543.769	553.546	640.782	588.088	186.073	170.32	187.363	248.863	205.064	1.01061	1.14741	P48510
sp|P34226|SKT5_YEAST	357.057	365.084	315.225	361.373	342.287	327.124	521.623	382.758	503.391	420.001	1.55952	1.14722	P34226
sp|P38254|TTL_YEAST	533.722	532.819	396.06	398.363	470.817	249.023	517.445	252.059	290.798	254.292	2.08143	1.14702	P38254
sp|P53953|SFB2_YEAST	238.003	307.251	225.957	236.897	263.26	552.11	484.147	436.975	524.999	581.12	0.679268	1.14596	P53953
sp|Q12246|LCB4_YEAST	141.187	125.672	145.33	135.447	143.477	657.29	589.806	620.813	662.914	603.868	1.00811	1.14573	Q12246
sp|P38713|OSH3_YEAST	474.962	488.77	460.87	439.045	424.71	283.435	293.478	326.756	356.645	328.232	1.00618	1.14573	P38713
sp|Q99220|OS9_YEAST	163.54	181.205	145.103	134.487	137.413	623.17	568.695	614.291	652.308	628.449	0.823622	1.1457	Q99220
sp|P81449|ATPJ_YEAST	85.4851	97.0619	86.2662	82.2598	110.296	696.338	581.986	704.794	769.769	686.146	0.736096	1.14538	P81449
sp|P07347|ARD1_YEAST	484.118	474.616	502.943	518.753	521.918	256.889	319.044	265.717	313.888	245.443	1.26682	1.14529	P07347
sp|P34160|NCBP1_YEAST	560.885	439.77	640.783	617.979	466.239	191.566	215.356	233.257	257.623	246.228	1.4338	1.14522	P34160
sp|P53115|INO80_YEAST	220.695	195.076	309.579	292.898	226.949	431.913	489.046	565.713	612.765	519.405	1.28097	1.14486	P53115
sp|Q08004|BUD20_YEAST	618.116	616.964	543.162	565.72	563.577	172.047	224.201	186.419	222.277	184.772	1.30557	1.1448	Q08004
sp|P11433|CDC24_YEAST	449.614	380.404	521.88	434.204	427.07	323.413	359.524	350.531	333.872	272.307	1.31391	1.1448	P11433
sp|Q08925|MRN1_YEAST	360.688	449.827	374.084	403.039	403.366	349.928	429.185	353.385	435.829	334.74	0.983448	1.1447	Q08925
sp|P38688|SRP72_YEAST	382.588	310.412	386.267	366.715	372.262	376.114	409.819	404.023	439.031	378.89	1.34297	1.14459	P38688
sp|P23724|PSB6_YEAST	581.714	623.137	594.842	633.708	593.717	137.297	208.479	161.123	196.275	156.061	1.41752	1.14346	P23724
sp|P46683|YAR1_YEAST	703.985	806.33	644.411	609.021	652.282	86.9072	89.6724	90.8503	98.1761	98.8693	0.900852	1.14343	P46683
sp|Q04406|EMI1_YEAST	600.952	577.979	470.253	502.891	549.046	175.006	353.346	211.376	258.432	197.331	2.09931	1.14327	Q04406
sp|Q04430|PANK_YEAST	630.774	693.84	545.989	586.271	587.215	168.753	205.113	146.498	179.829	146.154	1.10499	1.14318	Q04430
sp|Q8TGJ3|KISH_YEAST	108.574	7.62564	133.835	131.456	72.7694	788.896	399.835	697.509	783.107	687.885	7.21622	1.14304	Q8TGJ3
sp|P40308|TGL3_YEAST	132.237	79.524	194.224	171.229	141.327	634.777	497.71	684.165	688.936	605.089	1.3038	1.1422	P40308
sp|Q12389|DBP10_YEAST	520.081	520.941	520.984	523.851	491.689	217.42	278.678	246.359	282.718	231.709	1.27964	1.1413	Q12389
sp|Q12517|DCP1_YEAST	520.682	449.159	517.418	534.127	554.112	201.865	296.334	246.53	290.421	264.868	1.70174	1.14118	Q12517
sp|P34247|UTP11_YEAST	277.248	364.65	265.214	279.881	324.357	338.056	561.113	449.309	541.028	352.31	1.26199	1.14103	P34247
sp|O14455|RL36B_YEAST	530.986	503.136	514.003	437.86	479.809	236.889	364.655	293.809	285.485	234.463	1.62455	1.14064	O14455
sp|Q03705|CG121_YEAST	708.981	696.568	585.029	557.717	610.793	128.524	163.15	139.869	152.065	147.618	1.29203	1.14044	Q03705
sp|Q12692|H2AZ_YEAST	321.244	363.925	339.195	303.94	340.369	377.158	475.33	483.061	493.135	380.246	1.11249	1.13927	Q12692
sp|P38885|AIM46_YEAST	116.613	54.1401	136.955	125.974	115.696	713.932	494.688	639.464	669.881	720.528	1.49246	1.13888	P38885
sp|P00812|ARGI_YEAST	704.506	638.191	601.906	577.98	661.759	123.451	143.279	124.908	136.582	117.47	1.2812	1.13873	P00812
sp|P39008|POP2_YEAST	410.464	455.251	466.829	418.022	450.05	280.208	427.268	338.43	345.079	285.989	1.37481	1.1387	P39008
sp|P38889|SKN7_YEAST	357.027	469.837	407.745	403.67	405.821	306.986	360.012	386.652	435.865	353.468	0.891153	1.13866	P38889
sp|Q08412|CUE5_YEAST	580.516	594.617	535.019	498.489	574.463	222.213	248.677	220.101	233.47	214.232	1.09255	1.13847	Q08412
sp|P38811|TRA1_YEAST	428.781	390.58	536.109	390.768	424.991	308.068	302.48	386.368	320.607	360.687	1.07789	1.13843	P38811
sp|P33750|DCA13_YEAST	284.255	412.112	344.976	417.542	288.113	376.358	403.448	404.517	557.054	379.769	0.7394	1.13775	P33750
sp|P0CX47|RS11A_YEAST	546.407	553.284	530.271	472.757	450.438	206.894	346.246	266.972	270.737	221.973	1.65274	1.13747	P0CX47
sp|Q12335|PST2_YEAST	140.409	101.619	179.975	162.248	136.871	590.255	439.953	678.074	695.256	669.58	1.02988	1.13737	Q12335
sp|P12383|PDR1_YEAST	348.119	384.427	452.018	480.164	356.677	306.263	348.033	394.213	476.263	332.986	1.02906	1.13732	P12383
sp|P28007|GAR1_YEAST	393.281	329.698	404.318	439.451	371.316	330.044	422.666	355.448	439.306	308.777	1.52761	1.13711	P28007
sp|P0CX56|RS18B_YEAST	522.55	485.618	511.969	458.985	478.244	244.94	366.32	290.723	296.353	228.259	1.60929	1.13704	P0CX56
sp|Q03790|NUP53_YEAST	111.153	111.184	128.306	116.279	112.071	694.325	449.237	617.178	635.921	707.301	0.646831	1.13694	Q03790
sp|Q04183|TR120_YEAST	344.167	401.251	366.971	340.926	376.072	364.466	435.1	421.242	444.572	380.119	1.02397	1.13601	Q04183
sp|P53178|ALG13_YEAST	171.133	192.459	172.659	161.875	197.131	625.938	543.992	567.532	604.136	605.341	0.772781	1.13541	P53178
sp|P40498|UTP25_YEAST	389.314	436.387	408.155	394.895	358.616	290.523	411.47	410.376	450.803	337.866	1.26353	1.1354	P40498
sp|Q01662|MAP1_YEAST	461.629	341.685	495.553	506.162	414.061	296.74	372.465	317.261	367.67	316.761	1.69581	1.1346	Q01662
sp|Q03944|VPS64_YEAST	134.748	135.57	148.178	137.115	160.29	639.729	588.729	627.695	658.705	610.844	0.914695	1.13407	Q03944
##sp|Q12879|NMDE1_HUMAN	86.5404	62.0571	78.8583	89.4064	86.3348	701.619	638.321	656.472	844.061	618.587	1.26872	1.13406	Q12879
sp|P38199|HEK2_YEAST	427.102	372.81	389.913	363.993	367.206	377.505	390.841	407.306	431.155	394.939	1.1861	1.13393	P38199
sp|P05319|RLA2_YEAST	513.605	541.167	493.104	449.053	485.645	249.444	325.724	282.175	291.31	249.194	1.23929	1.13365	P05319
sp|P38930|CSK2C_YEAST	407.25	385.698	412.019	405.894	396.528	342.659	429.256	350.023	390.864	348.475	1.32272	1.13353	P38930
sp|P25382|NLE1_YEAST	545.261	627.106	528.918	583.391	498.613	191.764	260.82	206.748	258.436	210.964	1.1826	1.13329	P25382
sp|Q01976|ADPP_YEAST	642.762	599.936	718.5	676.807	736.964	83.2717	80.2257	101.43	108.235	122.739	1.03219	1.13283	Q01976
sp|P41733|CDC91_YEAST	77.7535	87.9257	92.3463	88.2407	97.7627	724.348	644.546	627.157	678.859	713.508	0.786884	1.1328	P41733
sp|P38737|ECM29_YEAST	452.537	527.248	438.362	552.969	529.295	201.32	339.71	218.363	311.991	207.806	1.44831	1.13265	P38737
sp|Q3E7A4|COXM2_YEAST	357.667	349.606	385.104	393.054	429.444	338.262	377.122	400.397	462.367	380.435	1.14059	1.13141	Q3E7A4
sp|P53829|CAF40_YEAST	344.963	352.642	355.811	320.29	342.502	412.84	429.584	446.312	454.474	402.013	1.0179	1.13122	P53829
sp|P28795|PEX3_YEAST	137.589	148.489	111.207	101.956	122.225	626.973	620.956	641.212	664.513	673.413	0.917706	1.13037	P28795
sp|Q05924|DCR2_YEAST	123.695	119.221	147.043	105.498	156.39	677.468	560.412	640.448	519.297	755.705	0.858262	1.13014	Q05924
sp|Q04217|DHR1_YEAST	280.599	371.877	277.646	299.455	305.632	492.707	396.218	442.047	538.626	464.547	0.606783	1.12974	Q04217
sp|P38153|AP3M_YEAST	410.629	416.068	467.481	518.367	497.44	346.848	209.109	282.649	353.654	353.34	0.595002	1.12839	P38153
sp|Q05998|THI7_YEAST	97.1896	125.718	89.3108	112.738	127.949	636.11	662.021	580.9	827.093	625.636	0.804563	1.12794	Q05998
sp|P38152|TXTP_YEAST	174.25	138.655	127.027	130.129	151.764	762.928	633.645	514.065	593.742	597.132	1.04375	1.12746	P38152
sp|P40548|SNL1_YEAST	110.646	100.852	96.057	81.9675	113.268	729.738	661.151	665.749	640.463	622.474	0.993996	1.12738	P40548
sp|P38085|TAT1_YEAST	97.2784	90.0069	112.873	99.6424	97.7845	734.635	522.288	704.813	701.404	641.804	0.768384	1.1273	P38085
sp|Q12674|ATC8_YEAST	314.229	304.074	360.319	319.837	300.896	460.147	458.117	455.452	455.727	419.848	1.02884	1.12725	Q12674
sp|Q08446|SGT1_YEAST	566.054	596.038	503.323	484.206	667.073	192.236	253.367	212.991	230.896	180.784	1.2517	1.12687	Q08446
sp|P39526|LAA1_YEAST	485.365	253.213	626.733	587.691	508.24	255.036	231.889	287.423	303.542	295.384	1.74285	1.12624	P39526
sp|P37296|STV1_YEAST	144.036	140.866	144.622	115.206	181.822	632.172	614.459	632.089	566.853	621.964	0.993855	1.12578	P37296
sp|P14126|RL3_YEAST	514.17	396.56	520.374	444.631	473.083	263.628	340.293	313.895	301.864	301.015	1.67362	1.1255	P14126
sp|P09032|EI2BG_YEAST	559.782	630.566	633.853	597.764	570.106	161.696	193.556	177.58	188.269	166.987	1.06267	1.1242	P09032
sp|Q8IWI9|MGAP_HUMAN	702.45	574.228	280.178	144.34	296.981	347.384	424.686	496.861	287.755	310.981	1.49551	1.12418	Q8IWI9
sp|P40055|UTP7_YEAST	289.385	394.884	291.856	349.285	307.889	382.947	585.778	413.883	556.441	382.728	1.12099	1.12339	P40055
sp|P05739|RL6B_YEAST	512.613	486.152	498.809	434.443	476.157	259.448	330.729	297.135	290.61	266.012	1.34413	1.12294	P05739
sp|P22214|SEC22_YEAST	117.944	115.441	135.965	114.693	131.348	649.753	608.147	666.474	631.216	688.313	0.956259	1.12276	P22214
sp|P38260|FES1_YEAST	558.629	738.022	504.812	715.786	592.936	135.123	201.215	121.27	193.058	134.892	1.12716	1.12275	P38260
sp|Q12362|RIB2_YEAST	576.846	693.297	555.339	548.874	634.408	187.231	138.884	210.976	233.95	110.853	0.617183	1.12196	Q12362
sp|P53898|NSG2_YEAST	105.861	93.3134	81.4758	83.1087	117.682	672.264	686.634	616.677	705.544	687.416	1.15871	1.12163	P53898
sp|P50944|AVT4_YEAST	132.336	138.275	137.208	130.934	175.816	618.463	670.537	538.537	576.332	724.159	1.03763	1.12146	P50944
sp|P35169|TOR1_YEAST	205.379	203.139	210.287	203.482	240.312	571.179	521.891	532.711	577.959	585.057	0.92378	1.12122	P35169
sp|P07260|IF4E_YEAST	532.345	35.5583	692.675	628.367	366.8	273.362	229.323	338.828	344.481	294.138	12.5592	1.12073	P07260
sp|Q99385|VCX1_YEAST	97.1717	65.7434	122.793	106.471	118.37	673.752	517.635	700.097	680.214	741.274	1.13556	1.12055	Q99385
sp|Q06070|YL407_YEAST	364.41	331.68	346.828	345.474	313.595	465.637	388.027	418.182	466.713	412.035	0.915557	1.12043	Q06070
sp|Q06704|IMH1_YEAST	497.049	573.992	495.486	532.384	525.65	193.368	237.782	245.928	295.869	293.299	1.06485	1.11969	Q06704
sp|P20448|DBP4_YEAST	522.877	542.928	507.189	532.827	508.789	192.872	370.762	240.075	282.152	197.399	1.85133	1.11871	P20448
sp|P38810|SFB3_YEAST	405.667	442.975	439.37	433.305	454.674	305.904	364.734	324.081	357.515	386.017	1.0919	1.1186	P38810
sp|Q00578|RAD25_YEAST	467.857	602.502	478.623	552.819	448.655	236.102	354.733	231.737	299.393	221.645	1.16669	1.11856	Q00578
sp|P24521|ERG8_YEAST	515.92	535.36	686.407	751.238	562.064	140.047	226.866	116.668	142.704	186.361	1.5611	1.1176	P24521
sp|P39936|IF4F2_YEAST	400.829	350.185	475.347	449.567	394.478	310.894	341.531	354.535	374.425	358.962	1.25741	1.11666	P39936
sp|P23639|PSA2_YEAST	591.026	660.423	569.207	620.134	607.995	137.677	226.511	151.756	184.438	151.421	1.47236	1.11555	P23639
sp|P39998|EDC3_YEAST	504.483	574.216	494.193	478.378	556.025	198.578	288.586	268.489	289.91	238.45	1.27678	1.11548	P39998
sp|P38775|YHK5_YEAST	75.9491	99.8828	100.425	91.0297	87.8325	722.382	628.233	675.521	682.955	664.776	0.661281	1.11535	P38775
sp|P29295|HRR25_YEAST	365.102	206.831	356.265	339.306	343.835	473.46	383.065	438.226	465.394	462.728	1.4282	1.11507	P29295
sp|P38909|CYC2_YEAST	78.692	66.3134	97.3812	91.8039	82.5365	673.531	617.147	718.339	755.042	661.335	1.08733	1.11495	P38909
sp|P04037|COX4_YEAST	191.752	188.983	204.329	212.404	205.969	579.225	592.331	527.091	610.892	567.077	1.03761	1.11492	P04037
sp|Q08951|AP3D_YEAST	512.986	563.379	539.189	497.349	491.121	263.29	231.008	258.881	266.2	247.644	0.79891	1.11477	Q08951
sp|P40481|HPM1_YEAST	653.932	692.649	646.97	589.277	600.117	115.755	166.293	140.047	142.188	140.572	1.35629	1.11469	P40481
sp|P25567|SRO9_YEAST	555.944	562.202	541.04	512.648	480.336	222.837	281.277	236.601	249.794	224.475	1.2482	1.11423	P25567
sp|Q02642|NACB1_YEAST	470.826	510.64	440.528	412.848	462.049	278.496	401.691	299.2	312.412	293.058	1.3299	1.11416	Q02642
sp|P53909|ADE_YEAST	604.97	706.693	634.784	689.536	624.206	120.977	157.429	118.771	143.73	108.057	1.114	1.11405	P53909
sp|P39015|STM1_YEAST	529.202	460.904	527.227	492.331	517.595	248.843	309.203	244.095	253.865	234.426	1.42669	1.11374	P39015
sp|P38925|SMF1_YEAST	276.78	269.191	269.084	275.482	282.567	493.078	473.786	469.088	534.573	514.598	0.987964	1.11314	P38925
sp|P32457|CDC3_YEAST	461.171	469.726	476.988	488.496	480.888	259.959	300.187	308.244	351.128	277.507	1.13372	1.11229	P32457
sp|P32895|KPR1_YEAST	599.022	583.109	632.651	597.071	600.682	149.468	202.966	188.265	197.583	165.476	1.39498	1.11203	P32895
sp|Q08157|YOL19_YEAST	201.304	155.485	179.604	209.34	192.925	582.527	552.979	504.45	652.879	596.984	1.22901	1.1104	Q08157
sp|Q08245|ZEO1_YEAST	393.939	424.073	348.52	357.917	360.753	376.895	380.672	361.414	411.988	447.514	0.938251	1.11001	Q08245
sp|P40851|AXL1_YEAST	357.458	282.82	319.282	307.226	334.955	439.479	463.048	435.259	464.663	450.532	1.33169	1.10945	P40851
sp|Q08920|NCBP2_YEAST	605.455	633.878	555.818	535.386	577.397	171.158	210.224	199.63	213.288	184.277	1.17317	1.10919	Q08920
sp|P47173|YJ9J_YEAST	597.233	604.484	646.683	638.892	665.642	125.568	168.078	144.395	158.23	128.104	1.32249	1.10917	P47173
sp|P0CX53|RL12A_YEAST	518.116	509.744	477.44	432.402	471.842	253.707	362.62	293.787	295.069	270.21	1.45276	1.10898	P0CX53
sp|P38836|ECM14_YEAST	292.754	281.296	284.706	259.522	268.932	453.892	596.781	466.692	471.741	483.255	1.36836	1.10891	P38836
sp|P32792|YHH7_YEAST	74.3503	73.7279	84.8321	82.0373	105.001	764.425	556.304	650.243	696.94	734.17	0.733885	1.10833	P32792
sp|O14467|MBF1_YEAST	455.106	582.304	430.148	490.263	460.518	232.236	407.249	266.761	336.908	245.611	1.37055	1.1081	O14467
sp|Q12136|SAS10_YEAST	309.159	386.988	354.535	433.018	346.714	310.081	540.55	378.957	512.767	319.339	1.39265	1.10786	Q12136
sp|Q05040|FAR8_YEAST	128.952	119.272	158.11	163.371	183.757	655.206	543.416	572.003	654.713	685.21	0.896695	1.10773	Q05040
sp|P48164|RS7B_YEAST	504.759	479.509	501.719	438.215	472.727	245.812	372.911	291.138	281.636	262.488	1.59694	1.10755	P48164
##sp|Q5H9L4|TAF7L_HUMAN	418.438	389.492	382.062	410.862	464.722	344.304	393.617	358.411	426.73	285.507	1.22819	1.10716	Q5H9L4
sp|P38837|NSG1_YEAST	101.974	109.72	102.188	86.3177	106.733	700.585	626.017	673.7	630.016	616.849	0.830483	1.1071	P38837
sp|P32588|PUB1_YEAST	513.561	493.662	514.923	494.758	496.8	247.302	323.856	269.499	286.671	250.368	1.36234	1.10707	P32588
sp|P22353|RM08_YEAST	200.374	378.196	299.217	293.072	396.564	436.214	574.478	428.94	464.936	403.237	0.697747	1.10664	P22353
sp|Q05926|GLRX8_YEAST	612.423	577.25	656.641	652.933	779.416	103.861	86.9958	132.213	145.311	125.227	0.888655	1.10531	Q05926
sp|P32319|VPS10_YEAST	167.272	160.449	160.747	132.449	184.384	666.435	595.37	574.658	523.244	601.503	0.931357	1.10507	P32319
sp|P33201|MRT4_YEAST	474.947	427.981	453.774	440.934	452.988	288.949	362.861	300.567	322.717	311.669	1.39361	1.10496	P33201
sp|P53171|GEP7_YEAST	228.714	164.227	253.876	296.307	230.956	529.466	430.018	508.327	655.366	559.982	1.13109	1.10464	P53171
sp|P26783|RS5_YEAST	561.588	504.374	548.195	479.036	530.355	233.082	299.206	272.763	263.271	235.699	1.42931	1.10455	P26783
sp|Q12504|RKM4_YEAST	566.036	440.769	665.865	648.99	591.93	184.596	186.668	178.267	191.909	196.378	1.29861	1.10452	Q12504
sp|P38196|FUI1_YEAST	107.236	99.025	106.015	101.005	106.907	750.999	599.536	627.231	659.985	594.443	0.864513	1.10441	P38196
sp|P38129|TAF5_YEAST	486.486	445.273	503.669	469.214	511.274	240.959	302.861	310.352	319.291	285.537	1.37323	1.10435	P38129
sp|P32379|PSA5_YEAST	626.725	691.615	596.23	598.347	635.132	116.773	182.025	144.77	160.406	147.242	1.41255	1.10409	P32379
sp|P08539|GPA1_YEAST	120.166	117.048	128.744	120.362	137.992	681.731	594.432	642.356	662.852	590.917	0.895175	1.10377	P08539
sp|P22219|VPS15_YEAST	198.345	201.77	194.559	154.841	261.503	582.713	563.183	583.862	512.486	578.149	0.950081	1.10291	P22219
sp|P36041|EAP1_YEAST	482.738	471.112	504.698	523.488	512.888	233.506	294.607	250.474	286.408	270.604	1.29281	1.10242	P36041
sp|P23292|KC12_YEAST	148.188	117.721	137.915	137.412	139.147	608.826	601.724	645.335	708.626	643.932	1.24411	1.10209	P23292
sp|P40087|DDI1_YEAST	350.938	479.458	333.096	429.864	376.77	336.671	430.067	328.196	466.663	314.807	0.934994	1.10182	P40087
sp|Q01896|ATN2_YEAST	114.201	104.137	110.238	106.304	111.424	661.953	578.818	693.519	736.657	657.883	0.958915	1.10151	Q01896
sp|P0CX82|RL19A_YEAST	523.793	484.804	499.844	440.126	455.948	279.174	316.991	324.526	314.746	278.818	1.22678	1.10146	P0CX82
sp|Q08647|PUS7_YEAST	616.629	637.745	647.652	645.72	571.297	138.847	155.323	142.783	156.743	127.629	1.08162	1.10105	Q08647
sp|P38962|TVP23_YEAST	132.421	141.775	158.676	137.05	150.717	655.117	487.929	656.995	624.782	652.944	0.695655	1.10103	P38962
sp|Q12009|TRMB_YEAST	679.09	681.935	634.561	611.582	630.326	110.482	135.513	130.317	138.241	126.437	1.22144	1.10066	Q12009
sp|Q08235|BRX1_YEAST	347.195	352.283	336.669	378.403	349.827	381.399	504.834	373.157	461.546	386.812	1.30452	1.10045	Q08235
sp|P53890|BNI5_YEAST	557.655	647.29	512.319	564.639	547.963	166.035	196.081	215.314	261.087	227.68	1.01742	1.10023	P53890
sp|P49626|RL4B_YEAST	518.264	386.501	549.122	441.225	500.146	287.317	300.375	308.171	272.369	307.491	1.40186	1.09995	P49626
sp|P38342|TSC10_YEAST	172.006	86.5013	177.239	158.637	163.869	630.476	535.312	598.605	589.202	604.752	1.68834	1.09971	P38342
sp|P39727|ERV46_YEAST	129.334	143.262	135.208	114.761	107.82	687.914	573.836	674.821	629.817	624.532	0.753071	1.0996	P39727
sp|P40994|ARF3_YEAST	222.462	178.474	204.028	156.364	189.696	616.039	427.989	646.291	544.576	630.279	0.865975	1.09947	P40994
sp|P17076|RL8A_YEAST	505.591	454.517	514.881	455.365	474.238	261.572	337.145	289.125	281.137	282.43	1.43375	1.09946	P17076
sp|Q12230|LSP1_YEAST	295.67	275.264	262.806	251.615	278.508	429.606	521.249	512.472	539.139	479.745	1.30327	1.09883	Q12230
sp|P38732|EFM1_YEAST	448.568	434.755	437.682	439.804	432.257	323.232	344.134	286.87	316.726	336.567	1.09849	1.09875	P38732
sp|O43137|YB085_YEAST	587.807	781.702	645.42	793.653	664.436	87.7278	88.2831	67.9599	91.8122	80.1308	0.756717	1.09865	O43137
sp|Q01477|UBP3_YEAST	364.985	359.848	360.685	368.428	375.635	388.009	508.803	377.74	423.853	330.753	1.33004	1.09849	Q01477
sp|P53893|RIA1_YEAST	538.143	504.149	594.945	558.778	533.013	192.437	194.221	254.576	262.53	236.757	1.07733	1.09799	P53893
sp|P36068|SHE2_YEAST	362.903	305.858	379.345	367.435	339.648	410.406	388.666	423.053	449.745	426.033	1.12366	1.09756	P36068
sp|P07281|RS19B_YEAST	583.129	564.807	573.019	499.657	505.363	199.851	276.394	263.224	251.903	220.458	1.42786	1.0975	P07281
sp|P53049|YOR1_YEAST	93.7999	127.344	98.2018	130.109	109.953	583.801	758.857	586.621	852.614	565.636	0.957453	1.097	P53049
sp|P38132|MCM7_YEAST	593.403	1422.33	303.927	260.838	629.764	134.228	186.474	161.76	152.161	149.894	0.579595	1.09605	P38132
sp|P49166|RL37A_YEAST	544.772	323.848	580.775	501.072	407.674	275.641	292.47	316.897	299.654	299.416	1.78489	1.096	P49166
sp|Q12522|IF6_YEAST	593.355	673.517	492.433	479.608	463.932	219.554	294.96	226.333	241.585	231.698	1.18355	1.09593	Q12522
sp|P40345|PDAT_YEAST	115.14	74.8226	118	111.808	110.398	746.455	584.71	634.146	658.137	697.458	1.20539	1.09531	P40345
sp|P53141|MLC1_YEAST	526.747	577.584	510.846	507.861	554.291	237.114	258.869	231.768	252.323	214.422	0.995658	1.09509	P53141
sp|Q07804|YEH1_YEAST	219.403	381.646	164.443	209.699	218.586	519.503	620.229	456.497	637.452	473.327	0.686349	1.09504	Q07804
sp|P14164|ABF1_YEAST	252.283	227.177	255.916	278.605	246.083	364.948	407.497	623.813	743.381	496.559	1.23999	1.09463	P14164
sp|Q03862|ARX1_YEAST	527.911	544.093	528.543	546.686	511.526	199.079	291.467	229.635	259.985	234.369	1.42053	1.0946	Q03862
sp|Q00684|CDC14_YEAST	229.593	260.86	247.648	221.668	236.034	526.104	527.509	533.15	522.316	543.571	0.882491	1.0945	Q00684
sp|P37304|PAM1_YEAST	487.379	389.909	475.359	430.516	431.754	296.32	344.187	360.692	357.474	288.484	1.4519	1.09431	P37304
sp|P40050|MRX1_YEAST	314.506	340.504	370.58	373.018	360.827	418.318	468.934	375.866	413.967	421.362	1.03541	1.09417	P40050
sp|P15303|SEC23_YEAST	421.895	352.262	446.98	448.092	388.151	371.953	361.125	334.628	366.911	408.095	1.16281	1.09375	P15303
sp|P53322|TNA1_YEAST	94.5963	141.408	102.542	115.462	76.637	595.411	855.698	644.449	793.412	468.472	0.961398	1.09339	P53322
sp|Q3E841|YN034_YEAST	769.654	879.338	557.18	584.998	616.686	118.563	117.244	94.4088	108.356	105.638	0.865534	1.09315	Q3E841
sp|Q12283|FABD_YEAST	480.879	561.036	414.498	448.303	475.833	338.596	401.434	232.315	274.645	248.329	1.0162	1.09306	Q12283
sp|P25586|KRR1_YEAST	398.45	429.87	397.75	444.112	388.329	294.4	448.833	363.842	443.988	286.555	1.41314	1.09289	P25586
sp|P32867|SSO1_YEAST	116.985	99.6604	117.522	112.863	130.502	652.912	566.431	677.692	711.271	664.354	1.01836	1.09288	P32867
sp|P26786|RS7A_YEAST	550.971	562.743	500.62	439.239	494.991	221.322	357.084	271.639	260.447	244.082	1.57966	1.09279	P26786
sp|P39976|DLD3_YEAST	588.661	576.609	656.668	632.996	577.984	175.162	152.721	156.953	165.299	182.003	0.89011	1.09256	P39976
sp|P40086|COX15_YEAST	156.493	164.445	137.205	136.23	174.886	603.641	612.918	577.652	626.62	602.079	0.966268	1.09253	P40086
sp|P34078|LTV1_YEAST	674.177	583.919	676.139	673.104	630.276	83.3042	197.743	116.371	126.451	115.057	2.74066	1.09152	P34078
sp|Q08144|TLG2_YEAST	131.714	120.847	115.318	119.057	145.782	605.147	698.138	616.306	693.816	571.821	1.25741	1.09041	Q08144
sp|P06634|DED1_YEAST	540.523	531.89	557.384	511.9	516.456	203.818	271.758	248.991	249.304	220.906	1.35498	1.09022	P06634
sp|Q03010|UME1_YEAST	601.399	534.435	652.731	598.454	624.878	161.192	194.393	198.163	198.043	173.591	1.35708	1.09004	Q03010
##sp|Q12181|NDOR1_YEAST	481.727	570.165	452.56	503.721	460.997	217.47	384.396	276.849	335.827	216.073	1.49341	1.08983	Q12181
sp|P32445|RIM1_YEAST	301.469	295.574	298.5	272.374	321.108	491.219	456.789	442.429	439.61	467.536	0.948455	1.08894	P32445
sp|P25087|ERG6_YEAST	114.507	98.5579	126.532	111.136	137.654	642.458	706.314	644.239	615.851	598.9	1.27731	1.08836	P25087
sp|P47912|LCF4_YEAST	253.784	251.302	268.623	291.076	227.654	519.94	495.907	516.308	608.881	500.209	0.963197	1.08833	P47912
sp|P38755|OSH7_YEAST	341.29	341.482	306.86	312.094	339.865	389.588	449.399	439.055	485.959	400.345	1.15287	1.08827	P38755
sp|P40081|MGDP1_YEAST	649.073	501.691	701.564	625.358	663.15	146.892	141.598	144.836	140.463	141.177	1.24714	1.08799	P40081
sp|P01119|RAS1_YEAST	105.918	127.088	108.718	106.798	126.192	656.097	632.68	640.282	684.249	658.475	0.803675	1.08788	P01119
sp|P03872|REP2_YEAST	272.667	386.381	257.177	364.713	297.748	345.631	667.245	394.717	608.848	328.105	1.36235	1.08769	P03872
sp|P06100|NOT2_YEAST	331.58	355.78	332.889	321.304	318.551	395.096	493.178	422.683	443.61	453.605	1.16334	1.08735	P06100
sp|Q12102|CFT2_YEAST	537.59	454.427	479.394	509.881	490.194	230.805	331.545	275.395	318.394	249.381	1.69936	1.08701	Q12102
sp|Q07896|NOC3_YEAST	430.24	496.889	428.337	417.122	460.256	413.873	303.307	269.624	285.257	346.542	0.634551	1.08642	Q07896
sp|P06105|SC160_YEAST	251.389	240.17	269.756	252.802	248.964	433.572	578.422	525.486	534.993	521.399	1.3964	1.08637	P06105
sp|Q12028|AP1G1_YEAST	369.426	363.068	405.789	370.755	404.239	316.031	444.791	429.553	426.23	329.792	1.43208	1.08603	Q12028
sp|P25339|PUF4_YEAST	495.678	498.168	458.855	479.397	479.57	302.747	336.677	265.792	301.456	252.295	1.10651	1.08558	P25339
sp|P53741|BRE5_YEAST	372.275	424.457	349.677	352.212	382.594	334.04	547.5	378.573	413.933	340.55	1.43753	1.08553	P53741
sp|P36136|SHB17_YEAST	623.634	457.989	738.892	730.27	673.52	137.085	98.0924	116.358	124.778	122.595	0.974363	1.08502	P36136
sp|P38072|SCO2_YEAST	114.023	103.626	120.508	99.6479	119.585	684.584	590.552	653.048	585.859	744.615	0.949196	1.08492	P38072
sp|P53276|UTP8_YEAST	320.676	378.539	313.01	355.082	319.774	386.094	526.007	433.726	533.667	381.976	1.15413	1.08464	P53276
sp|P38251|RFC5_YEAST	487.933	482.971	504.653	480.054	485.802	253.233	317.911	280.29	289.064	267.203	1.26831	1.08415	P38251
sp|P40159|YNU8_YEAST	653.496	591.436	621.408	671.53	784.809	95.2909	67.6831	119.476	139.878	129.295	0.78481	1.08337	P40159
sp|Q8IVG5|SAM9L_HUMAN	106.298	134.654	103.02	112.414	123.884	664.213	601.927	621.798	734.598	652.984	0.715392	1.08268	Q8IVG5
sp|P53849|GIS2_YEAST	632.341	678.805	661.64	628.04	580.49	107.007	159.662	157.567	161.896	119.979	1.38994	1.08244	P53849
sp|P32266|MGM1_YEAST	132.428	151.855	148.989	149.026	157.981	618.384	626.596	554.384	600.203	657.979	0.88365	1.08238	P32266
sp|P32467|HXT4_YEAST	59.6917	19.3053	97.2383	128.536	110.067	386.97	151.202	619.122	885.663	1438.28	1.20814	1.08219	P32467
sp|Q6NXP0|EFC12_HUMAN	80.7124	87.7866	92.238	92.3791	93.8159	724.003	635.841	664.167	719.64	645.508	0.807458	1.08187	Q6NXP0
sp|P22803|TRX2_YEAST	648.926	581.996	660.281	687.716	727.545	113.617	107.821	109.513	123.342	112.251	1.05811	1.08135	P22803
sp|P40525|RL34B_YEAST	568.623	459.169	552.168	443.998	501.175	227.519	332.432	293.603	255.125	231.071	1.80941	1.08065	P40525
sp|Q07914|TIM14_YEAST	121.08	125.07	128.534	133.298	129.973	591.426	619.83	614.433	688.581	679.021	1.0146	1.08063	Q07914
sp|Q12745|SEC39_YEAST	143.396	94.661	150.277	130.075	124.035	731.636	596.163	663.123	620.173	557.567	1.23434	1.08049	Q12745
sp|Q05946|UTP13_YEAST	309.865	330.364	341.184	408.163	331.701	348.514	451.787	403.305	521.294	384.855	1.21589	1.08045	Q05946
sp|Q06708|VAC14_YEAST	286.414	208.307	325.274	320.222	335.076	520.524	434.104	411.417	437.255	549.981	1.14669	1.07957	Q06708
sp|P05759|RS27A_YEAST	457.72	456.567	410.968	392.968	465.687	343.23	379.898	306.37	316.244	288.863	1.10963	1.07951	P05759
sp|Q05518|PAL1_YEAST	503.063	401.139	524.661	411.013	452.721	251.731	298.557	357.111	301.976	355.746	1.48737	1.07943	Q05518
sp|O95644|NFAC1_HUMAN	513.952	521.114	539.68	483.88	470.735	216.673	330.884	289.263	279.92	232.006	1.50612	1.0793	O95644
sp|Q03327|UGO1_YEAST	128.477	85.4337	132.157	122.112	132.093	677.807	484.324	636.03	634.169	787.468	1.07455	1.0791	Q03327
sp|Q02256|PVH1_YEAST	552.509	316.525	715.439	715.816	565.081	183.397	180.537	185.815	200.612	217.754	1.71833	1.07906	Q02256
sp|P14741|EI2BA_YEAST	450.089	490.64	646.453	579.039	664.829	188.038	276.414	207.041	200.091	161.885	1.3485	1.07894	P14741
sp|P25644|PAT1_YEAST	532.066	506.475	544.218	508.593	483.317	272.422	282.066	281.227	283.522	246.14	1.08772	1.07878	P25644
sp|P47057|SNX4_YEAST	324.226	272.949	307.871	531.199	352.536	373.137	579.404	294.105	547.202	308.314	1.8445	1.07834	P47057
sp|P32568|SNQ2_YEAST	95.7813	119.848	101.179	126.891	114.898	620.765	670.106	580.967	785.383	611.667	0.862709	1.07793	P32568
sp|P32597|STH1_YEAST	377.197	333.437	553.497	535.058	371.853	322.079	256.788	380.71	396.664	400.863	0.901916	1.07781	P32597
sp|P08004|CHS1_YEAST	95.6944	96.4073	103.794	105.293	106.326	628.135	613.33	672.319	735.049	706.056	0.969211	1.07774	P08004
sp|P39006|PSD1_YEAST	104.96	82.0301	86.1931	85.037	107.434	738.485	648.836	593.479	630.689	728.207	1.1242	1.07715	P39006
sp|O75691|UTP20_HUMAN	722.958	652.291	668.832	543.838	617.799	144.009	121.584	141.569	123.97	136.787	0.93575	1.07696	O75691
sp|P22146|GAS1_YEAST	92.6473	75.7878	98.0316	86.2519	92.7448	711.976	604.88	699.587	662.719	724.378	1.03857	1.07668	P22146
sp|P06104|UBC2_YEAST	594.301	566.493	713.223	774.658	540.026	123.072	125.028	140.762	164.606	109.656	1.06576	1.07665	P06104
sp|P42949|TIM16_YEAST	87.8554	89.5455	97.4511	99.7277	117.99	638.892	636.012	646.023	711.622	691.379	0.976702	1.0764	P42949
sp|P11632|NHP6A_YEAST	554.395	580.869	557.445	541.766	570.916	178.485	220.364	226.637	237.041	213.641	1.17836	1.07617	P11632
sp|P25342|CDC10_YEAST	436.833	430.549	469.552	454.354	442.638	299.903	337.394	350.894	365.323	320.793	1.14143	1.07594	P25342
sp|P53883|NOP13_YEAST	496.904	586.005	476.533	461.265	473.325	236.606	296.122	278.292	289.79	262.648	1.06124	1.07578	P53883
sp|P35189|TAF14_YEAST	508.728	532.449	494.155	470.216	500.306	212.625	310.211	293.071	299.951	240.902	1.39396	1.07558	P35189
sp|P32573|SPS19_YEAST	236.697	238.655	150.586	124.827	158.441	682.087	814.99	471.538	420.315	527.737	1.18505	1.07531	P32573
sp|P32329|YPS1_YEAST	96.0538	75.4311	94.4235	101.818	95.5286	656.173	660.013	633.207	733.954	705.394	1.28085	1.07493	P32329
sp|Q07468|VAM6_YEAST	137.433	106.177	141.399	131.158	136.886	664.125	608.921	604.906	602.923	692.814	1.18678	1.07455	Q07468
sp|P40091|PEA2_YEAST	307.344	352.084	483.029	437.444	457.684	284.827	391.699	418.353	406.942	327.428	1.20047	1.07409	P40091
sp|Q00776|AP1M1_YEAST	456.904	514.071	452.551	452.137	464.829	256.74	425.776	293.268	314.599	254.488	1.47398	1.07372	Q00776
sp|Q02487|DSC2_HUMAN	410.014	426.015	360.864	276.647	420.857	330.94	406.03	510.743	420.319	308.171	1.18082	1.07348	Q02487
sp|P38272|SHE3_YEAST	457.249	428.726	355.734	372.805	412.129	406.954	355.443	379.468	426.691	313.925	0.931534	1.07296	P38272
sp|P32527|ZUO1_YEAST	433.541	421.089	448.994	420.756	402.958	273.435	435.887	339.244	341.1	353.563	1.64125	1.07295	P32527
sp|P34163|TGL1_YEAST	163.617	170.908	174.247	163.05	209.607	606.43	603.923	603.073	605.445	574.237	0.953384	1.07288	P34163
sp|P19516|COX11_YEAST	79.3496	79.2921	83.7018	90.7623	102.636	668.788	607.753	637.231	741.262	759.233	0.909397	1.07276	P19516
sp|O95155|UBE4B_HUMAN	453.38	460.113	507.828	473.916	529.973	330.832	311.124	265.111	265.34	255.653	0.926668	1.07248	O95155
sp|P10592|HSP72_YEAST	496.962	494.417	526.505	531.969	452.243	272.295	291.857	290.74	314.946	230.224	1.07736	1.07213	P10592
sp|P32839|BCS1_YEAST	138.242	131.943	115.05	119.322	152.726	605.197	509.215	630.463	700.956	706.804	0.881571	1.072	P32839
sp|P40038|PCL6_YEAST	399.575	466.516	351.916	385.39	404.898	303.415	479.808	348.242	408.711	344.427	1.35445	1.0717	P40038
sp|P40540|EMC5_YEAST	93.1029	57.9781	96.4642	83.3926	108.017	769.665	633.431	682.308	631.877	656.885	1.32159	1.07125	P40540
sp|Q03707|SRC1_YEAST	112.401	121.779	99.9967	99.3473	102.285	650.898	672.096	601.879	640.554	683.113	0.953058	1.07121	Q03707
sp|Q01329|PTA1_YEAST	520.871	479.2	536.64	556.317	578.217	221.823	205.289	236.387	262.465	268.827	1.00594	1.07105	Q01329
sp|P25694|CDC48_YEAST	329.487	303.265	327.754	326.286	331.906	392.148	487.575	450.042	479.841	420.46	1.35085	1.07101	P25694
sp|P25631|YCU1_YEAST	595.394	642.997	674.124	615.578	656.652	120.033	164.447	156.479	152.975	102.031	1.26858	1.07058	P25631
sp|P06102|NOT3_YEAST	312.774	339.451	327.032	333.781	350.775	363.171	514.56	414.029	452.283	436.922	1.30551	1.07031	P06102
sp|Q12038|SRO7_YEAST	359.395	251.56	433.882	427.868	287.743	408.753	308.74	450.283	475.196	437.99	1.0791	1.07016	Q12038
sp|P53273|YG35_YEAST	91.3362	89.6474	101.591	97.9763	98.3669	689.014	676.276	646.663	667.27	702.456	1	1.06993	P53273
sp|P35719|MRP8_YEAST	672.295	673.571	678.403	634.356	705.736	85.2303	85.7175	106.694	106.736	88.4194	1.00381	1.06986	P35719
sp|P13134|KEX2_YEAST	148.65	133.108	152.771	129.038	146.707	661.938	551.504	665.857	601.415	612.739	0.930444	1.06934	P13134
sp|P53941|IMP4_YEAST	310.2	421.112	315.721	393.825	332.318	334.404	542.142	383.274	510.733	349.253	1.19422	1.06828	P53941
sp|P46989|ATG27_YEAST	182.856	187.866	180.499	158.935	169.264	568.147	475.996	620.571	583.612	594.709	0.815462	1.06804	P46989
sp|P27801|PEP3_YEAST	123.084	125.157	159.618	144.236	137.789	679.124	606.38	594.613	573.859	677.119	0.8781	1.06802	P27801
sp|Q08689|NAT5_YEAST	490.991	529.638	476.956	442.994	482.807	253.213	326.684	295.205	292.832	287.135	1.19601	1.06801	Q08689
sp|P0CX51|RS16A_YEAST	524.255	507.974	519.222	474.463	513.957	238.97	352.928	268.126	261.516	245.524	1.5242	1.06736	P0CX51
sp|P40032|TPA1_YEAST	581.78	649.595	607.309	604.86	589.953	155.496	202.415	167.774	178.291	149.654	1.16584	1.06699	P40032
sp|P53388|DIP5_YEAST	118.613	140.224	120.538	110.338	125.105	730.405	600.809	647.032	631.749	608.706	0.695801	1.06665	P53388
sp|P47083|MPP10_YEAST	312.912	428.956	317.682	358.478	317.415	373.883	478.731	410.906	494.406	335.66	0.934038	1.06628	P47083
sp|Q12160|YP063_YEAST	127.308	117.611	123.019	108.527	122.508	696.503	664.545	650.549	611.93	601.44	1.03278	1.06624	Q12160
sp|Q06168|SFH1_YEAST	519.058	525.863	404.544	481.4	504.295	250.443	385.162	274.532	348.258	200.307	1.51802	1.06603	Q06168
contaminant_sp|GAG_SCVLA|	391.31	303.484	457.916	423.235	365.314	361.568	412.334	378.134	372.253	376.787	1.47043	1.06512	GAG_SCVLA
sp|P35178|RRP1_YEAST	438.941	422.177	413.288	425.845	421.389	315.187	420.233	306.438	336.116	322.922	1.38623	1.06451	P35178
sp|P30771|NAM7_YEAST	349.85	378.881	368.519	379.075	391.878	374.25	459.855	375.425	411.035	429.379	1.13459	1.06437	P30771
sp|Q12453|CEX1_YEAST	593.846	673.009	543.095	529.571	635.311	162.196	176.353	183.461	190.386	201.968	0.959392	1.06425	Q12453
sp|P32589|HSP7F_YEAST	589.395	683.798	596.325	634.11	566.3	130.52	210.824	162.711	184.122	132.443	1.39226	1.06416	P32589
sp|Q07623|NOP6_YEAST	421.35	466.597	399.086	436.701	481.624	269.688	381.931	341.469	397.624	304.047	1.27886	1.06415	Q07623
sp|Q07418|PEX19_YEAST	493.007	536.365	500.019	468.203	544.931	242.627	284.634	258.29	257.341	289.147	1.0783	1.06403	Q07418
sp|Q06350|CHI2_YEAST	309.538	372.569	337.304	336.784	342.576	481.595	532.453	366.243	389.086	384.593	0.918556	1.06401	Q06350
sp|P53155|YGI2_YEAST	187.749	150.926	197.615	226.124	203.773	597.1	497.789	555.754	676.355	558.508	1.03708	1.06357	P53155
sp|P37262|SOL2_YEAST	623.527	692.044	593.786	641.514	641.554	128.145	151.558	126.77	145.638	142.003	1.06561	1.06336	P37262
sp|Q03640|TCB3_YEAST	102.738	78.7747	117.173	105.977	106.639	701.118	593.379	704.359	677.293	632.765	1.10378	1.06316	Q03640
sp|P25037|UBP1_YEAST	386.239	426.458	374.818	365.354	439.163	369.891	404.915	357.896	370.733	344.035	0.991448	1.0627	P25037
sp|P40309|KHA1_YEAST	258.096	241.607	212.346	234.664	256.909	505.443	513.439	502.278	589.861	550.666	1.08514	1.06268	P40309
sp|P36132|KAE1_YEAST	538.857	531.823	567.227	545.688	585.25	189.28	186.068	258.246	263.933	207.979	0.996035	1.06236	P36132
sp|A5Z2X5|YP010_YEAST	111.335	122.609	85.8563	92.7076	110.692	629.791	688.811	625.697	717.577	676.143	0.993153	1.06209	A5Z2X5
sp|P32791|FRE1_YEAST	92.5733	85.7042	75.2934	146.111	92.8917	621.552	592.119	503.353	1037.4	677.702	1.029	1.06206	P32791
sp|Q07657|SHS1_YEAST	486.92	552.957	482.48	504.721	494.811	260.842	274.237	305.309	339.124	249.685	0.925796	1.06181	Q07657
sp|P32468|CDC12_YEAST	450.567	469.283	447.609	474.491	472.981	288.791	309.679	311.152	349.81	307.649	1.02956	1.06055	P32468
sp|P21657|DAL81_YEAST	573.676	160.131	924.549	801.988	357.736	187.51	119.288	262.018	241.02	173.943	2.27911	1.06044	P21657
sp|P38934|BFR1_YEAST	278.214	288.632	273.491	268.952	273.574	405.776	586.951	500.067	521.468	470.374	1.39428	1.0604	P38934
sp|P46971|PMT4_YEAST	87.8747	93.5817	82.2181	76.822	88.6004	717.9	648.01	662.845	656.714	699.103	0.847599	1.06034	P46971
sp|P53929|YNK8_YEAST	679.834	48.6227	921.901	906.099	446.59	145.665	128.579	169.923	176.968	163.415	12.3418	1.05962	P53929
sp|Q03660|TR130_YEAST	366.321	371.338	374.779	363.966	347.186	387.837	429.22	405.112	416.81	399.385	1.09175	1.05944	Q03660
sp|P38340|NTM1_YEAST	633.542	680.009	626.577	617.942	607.224	117.233	175.826	147.874	154.382	150.722	1.39731	1.0586	P38340
sp|P01120|RAS2_YEAST	147.098	108.636	140.833	128.711	146.904	645.128	582.486	636.728	615.948	648.177	1.22257	1.05847	P01120
sp|P39996|GTT3_YEAST	94.3463	99.9742	112.189	101.034	120.54	682.868	595.219	664.273	633.055	685.055	0.822577	1.05822	P39996
sp|P53871|DUG3_YEAST	583.588	538.116	534.286	531.761	586.755	241.909	217.822	200.434	210.964	218.842	0.976516	1.05753	P53871
sp|P25365|SED4_YEAST	108.847	97.4233	102.412	98.398	102.022	685.39	676.214	653.046	663.533	635.047	1.1023	1.05751	P25365
##sp|Q3L8U1|CHD9_HUMAN	101.041	106.248	111.307	122.266	98.311	613.975	598.039	661.938	768.906	680.236	0.92631	1.05748	Q3L8U1
sp|P39106|MNN1_YEAST	116.32	114.009	122.665	112.06	124.989	702.701	627.446	598.63	578.196	713.949	0.911005	1.05727	P39106
sp|P19524|MYO2_YEAST	408.523	398.325	455.905	394.668	419.228	384.889	333.414	371.746	340.053	346.989	0.888436	1.05668	P19524
sp|Q12429|DPH6_YEAST	617.662	663.397	610.108	644.038	594.344	133.574	137.741	151.405	168.873	161.865	0.960106	1.05661	Q12429
sp|Q06833|YP091_YEAST	96.8275	84.717	104.764	97.4844	115.787	719.472	580.275	686.583	674.85	671.689	0.921825	1.05631	Q06833
sp|P16658|SEN2_YEAST	200.571	129.895	271.35	290.204	205.867	605.727	388.723	568.419	642.05	527.5	0.990923	1.05615	P16658
sp|P36062|AVT3_YEAST	101.041	101.522	81.9493	83.8563	96.4918	715.617	644.318	640.726	692.301	679.078	0.896095	1.05592	P36062
sp|P29478|SEC65_YEAST	431.538	421.879	423.58	446.225	490.579	286.116	325.383	318.019	353.659	327.088	1.16328	1.05564	P29478
sp|Q06506|RRP9_YEAST	281.344	385.78	326.209	376.29	314.244	387.907	534.286	408.379	496.988	385.34	1.00449	1.05501	Q06506
sp|P25642|IMG2_YEAST	263.272	204.861	320.571	321.719	329.55	497.872	415.555	466.893	494.229	522.21	1.07265	1.05477	P25642
sp|P53877|IPI3_YEAST	555.314	570.099	579.215	542.485	530.021	211.222	246.606	213.102	210.447	210.664	1.13724	1.0544	P53877
sp|P47031|IML2_YEAST	330.228	346.743	355.857	360.492	368.612	387.797	390.656	424.25	453.14	445.75	0.959391	1.05437	P47031
sp|Q01939|PRS8_YEAST	506.547	582.279	504.171	593.363	512.241	199.373	324.336	210.051	260.382	192.034	1.4152	1.05328	Q01939
sp|P32259|MED16_YEAST	516.612	409.475	531.869	537.319	505.122	218.545	339.124	267.456	284.589	255.978	1.95774	1.05327	P32259
sp|P26570|PPZ1_YEAST	213.221	209.145	187.832	242.015	224.589	451.537	576.556	539.717	732.326	452.643	1.30176	1.05309	P26570
sp|P38247|SLM4_YEAST	139.397	143.709	140.543	119.717	131.616	684.554	658.137	620.051	555.864	626.245	0.932566	1.05243	P38247
sp|Q08826|SNX3_YEAST	320.007	329.267	316.033	328.784	339.182	367.403	489.731	441.999	483.826	459.404	1.29547	1.05218	Q08826
sp|P33302|PDR5_YEAST	109.728	103.247	103.658	131.797	111.443	613.127	687.751	617.316	825.609	613.698	1.19212	1.05188	P33302
sp|P32341|VPH2_YEAST	98.7378	75.1294	99.8534	96.7175	109.387	708.977	605.961	674.029	686.155	710.151	1.12327	1.051	P32341
sp|P50945|MIC27_YEAST	111.42	97.0837	101.636	106.331	125.639	666.828	624.551	634.229	697.271	678.622	1.07491	1.05086	P50945
##sp|P53049|YOR1_YEAST	154.495	84.9523	118.693	100.413	91.6045	728.526	671.458	653.359	580.779	624.564	1.67615	1.05073	P53049
sp|P39543|SOP4_YEAST	96.8134	89.2629	111.436	106.287	115.325	696.459	600.97	666.072	667.328	624.546	0.935883	1.05042	P39543
sp|P36145|T2EB_YEAST	546.669	709.372	518.541	552.618	541.637	197.807	201.859	187.94	210.375	225.05	0.786425	1.05035	P36145
sp|P32618|YEF3_YEAST	115.362	112.79	93.1995	101.912	131.161	668.198	700.267	589.576	677.09	660.081	1.07189	1.05025	P32618
sp|P25639|YCV1_YEAST	96.5111	140.292	126.631	176.385	148.6	521.054	830.716	542.852	793.443	553.06	1.09677	1.04933	P25639
sp|P38620|KPR2_YEAST	696.978	643.457	566.611	565.405	559.711	133.029	201.738	163.311	170.855	185.147	1.64263	1.04842	P38620
##tr|A0A087WTX8|A0A087WTX8_HUMAN	607.912	226.758	695.279	667.998	466.692	220.689	225.536	255.272	257.061	201.121	2.73976	1.04813	A0A087WTX8
sp|P47044|YJF5_YEAST	652.462	522.463	689.433	681.806	638.186	139.947	140.392	123.572	128.082	140.363	1.25279	1.04809	P47044
sp|P40414|TPM2_YEAST	635.08	907.079	730.93	568.799	677.292	69.9129	57.9409	106.725	87.0195	67.756	0.580245	1.04777	P40414
sp|P32356|TREA_YEAST	601.691	807.455	535.013	478.151	615.828	149.555	184.228	176.94	165.673	191.051	0.917931	1.04767	P32356
sp|Q12025|YD056_YEAST	49.7806	115.591	95.7531	86.5046	61.9125	719.664	628.356	741.302	700.893	628.769	0.376021	1.04657	Q12025
sp|P28625|YIM1_YEAST	125.407	68.6191	142.668	150.984	144.127	634.287	535.761	625.232	692.479	674.192	1.5437	1.04656	P28625
sp|P27514|PHO91_YEAST	91.8155	88.1292	99.5985	102.888	94.3426	680.438	594.831	640.408	692.279	683.802	0.910754	1.04644	P27514
sp|P25298|RNA14_YEAST	468.47	599.649	429.303	546.552	517.102	226.923	316.653	243.746	324.668	250.649	1.09016	1.04625	P25298
sp|P31382|PMT2_YEAST	99.7845	105.818	100.99	83.5837	111.632	703.826	631.12	695.206	601.808	655.579	0.845569	1.04592	P31382
sp|Q06058|SEI1_YEAST	133.454	116.17	151.311	142.909	146.255	749.991	599.145	724.05	715.164	344.443	0.917727	1.0458	Q06058
sp|P53735|ZRG17_YEAST	108.635	106.114	112.69	107.379	115.182	710.729	637.496	642.861	640.495	644.283	0.91827	1.04559	P53735
sp|P53337|ERV29_YEAST	139.047	141.35	117.696	123.192	139.439	587.739	649.967	596.323	652.517	648.53	1.08786	1.04541	P53337
sp|P53112|PEX14_YEAST	87.8989	75.8113	100.765	98.9443	87.1696	683.486	615.061	698.088	716.521	708.102	1.04337	1.04529	P53112
sp|Q08601|MCA1_YEAST	494.767	549.475	574.345	601.657	578.596	161.926	211.533	231.89	253.825	186.624	1.17629	1.0449	Q08601
sp|O13525|COQ4_YEAST	332.15	353.257	358.657	333.934	289.493	424.647	342.768	471.612	458.81	487.799	0.758954	1.04488	O13525
sp|P33202|UFD4_YEAST	605.089	614.801	633.082	575.079	615.663	147.142	171.643	180.036	170.805	163.448	1.14809	1.04442	P33202
sp|Q9BUL8|PDC10_HUMAN	97.497	93.2595	97.2123	91.059	95.473	666.82	730.771	666.4	651.833	646.187	1.1457	1.04424	Q9BUL8
sp|Q04067|EIF3G_YEAST	568.326	555.431	492.432	488.479	713.94	140.474	348.257	209.064	216.512	260.701	2.53671	1.04401	Q04067
sp|P10622|RLA3_YEAST	443.327	40.3909	564.938	577.485	399.009	292.697	246.254	300.547	320.712	329.095	9.23431	1.04391	P10622
sp|Q07824|TPO1_YEAST	59.3591	0	77.901	145.792	74.1765	522.529	516.843	615.391	1201.09	733.586	#DIV/0!	1.04287	Q07824
sp|P22276|RPC2_YEAST	359.757	362.614	363.705	398.329	339.526	401.083	459.721	390.527	446.025	342.536	1.13717	1.04283	P22276
sp|Q12205|MNL2_YEAST	115.847	110.149	126.227	117.997	142.928	695.339	540.67	638.718	622.618	710.189	0.817787	1.04278	Q12205
sp|Q08954|YP199_YEAST	136.42	122.251	118.818	141.383	172.926	671.626	593.458	590.042	731.968	574.928	0.986027	1.04254	Q08954
sp|P05316|FUR4_YEAST	90.0444	85.7102	110.144	136.812	124.751	687.68	474.602	621.825	805.213	716.449	0.725049	1.04251	P05316
##sp|P23921|RIR1_HUMAN	91.547	66.6292	115.58	114.25	121.67	648.343	648.037	659.466	679.578	692.416	1.37333	1.0425	P23921
sp|P48582|BRO1_YEAST	544.968	620.14	548.884	567.616	586.749	185.991	223.224	215.772	232.482	212.508	1.0547	1.04188	P48582
sp|Q08287|NOP8_YEAST	386.155	467.802	333.548	402.102	381.186	357.737	492.565	337.988	424.379	338.714	1.13658	1.04153	Q08287
sp|Q08732|HRK1_YEAST	420.831	562.796	415.508	474.467	499.269	217.234	318.314	262.741	312.451	266.282	1.09568	1.04143	Q08732
sp|Q02875|SYH1_YEAST	551.431	641.586	570.611	518.185	571.895	189.284	204.126	211.263	199.778	223.153	0.926871	1.04131	Q02875
sp|Q00362|2ABA_YEAST	497.529	535.626	446.935	466.582	579.104	282.321	283.65	261.655	284.398	236.613	0.933246	1.04115	Q00362
sp|Q12017|PLP2_YEAST	614.726	611.045	646.547	636.724	666.982	136.889	165.933	132.462	135.802	125.812	1.21948	1.04103	Q12017
sp|Q06523|YP148_YEAST	510.842	551.125	517.748	468.911	490.955	220.608	259.741	281.217	265.137	263.631	1.09133	1.04102	Q06523
sp|P25580|PBN1_YEAST	79.4647	73.7445	93.524	86.3113	100.39	735.278	614.324	675.994	648.845	708.968	0.900308	1.04005	P25580
sp|P25361|YCT3_YEAST	102.738	91.0298	134.438	119.336	119.424	723.84	420.747	639.91	590.731	808.597	0.656035	1.03997	P25361
sp|P39925|AFG3_YEAST	91.5461	97.9598	98.5714	107.1	122.729	652.346	629.152	606.161	684.812	700.782	0.901301	1.03979	P39925
sp|P32795|YME1_YEAST	94.7387	84.6178	86.8128	106.375	109.669	646.753	656.917	602.721	767.359	678.27	1.1372	1.03903	P32795
sp|P32891|DLD1_YEAST	98.9543	78.7662	96.6606	100.16	83.0734	711.936	525.455	636.568	685.325	747.225	0.927233	1.03898	P32891
sp|P32767|KA122_YEAST	551.138	661.875	537.245	456.466	589.471	196.854	172.564	248.102	218.999	251.919	0.729946	1.0389	P32767
sp|P29453|RL8B_YEAST	465.359	415.273	539.771	458.239	481.447	273.475	325.552	321.928	283.881	290.348	1.33401	1.03871	P29453
sp|P38301|GDT1_YEAST	334.035	420.181	214.225	245.76	271.801	489.854	557.861	367.774	438.239	534.056	0.905348	1.0387	P38301
sp|P47119|ITPA_YEAST	653.743	619.12	665.35	657.344	667.842	110.504	123.051	117.042	120.103	114.742	1.17582	1.03865	P47119
sp|P32843|YME2_YEAST	81.3836	76.5838	86.6679	92.3926	91.7716	697.963	593.395	636.759	704.873	737.039	0.903465	1.03838	P32843
sp|P53730|ALG12_YEAST	91.1346	94.9533	84.7209	83.0829	97.3351	730.145	657.66	661.744	673.811	657.523	0.864501	1.03831	P53730
sp|P40335|PEP8_YEAST	247.278	235.541	302.798	282.39	324.3	451.913	560.104	465.444	450.398	556.774	1.30117	1.03761	P40335
sp|P39010|AKR1_YEAST	149.972	153.35	160.554	127.976	159.603	720.314	536.615	622.36	514.578	647.172	0.728561	1.0373	P39010
sp|P39730|IF2P_YEAST	516.204	504.525	515.599	519.627	494.529	225.702	295.096	275.637	288.121	254.543	1.33772	1.03719	P39730
sp|Q9BV47|DUS26_HUMAN	208.194	51.1706	308.884	326.61	132.377	629.073	237.326	627.578	688.248	601.033	1.53494	1.03715	Q9BV47
sp|Q12250|RPN5_YEAST	537.286	554.312	539.691	592.761	524.818	220.235	210.808	204.663	233.022	217.38	0.927791	1.03662	Q12250
sp|P12962|CAF20_YEAST	604.869	559.193	608.039	575.979	564.763	186.383	210.374	190.657	187.18	180.562	1.22092	1.03641	P12962
sp|P47135|JSN1_YEAST	449.279	537.721	433.603	529.089	451.784	251.259	284.325	301.476	381.128	272.268	0.94548	1.03605	P47135
sp|P02400|RLA4_YEAST	594.558	489.884	503.977	421.089	503.805	253.64	304.703	292.405	253.049	249.669	1.45801	1.03575	P02400
sp|P38682|GLO3_YEAST	514.594	583.44	514.174	517.785	578.988	194.218	258.839	248.195	258.627	205.992	1.17547	1.03477	P38682
sp|P34110|VPS35_YEAST	287.644	294.924	282.012	277.256	294.751	411.057	545.548	486.982	495.359	487.264	1.29442	1.03465	P34110
sp|P39722|GEM1_YEAST	158.767	224.254	171.056	170.597	173.85	604.96	611.184	539.349	556.277	635.22	0.715261	1.03416	P39722
sp|Q06485|ATG33_YEAST	101.257	68.2533	67.425	69.9365	88.1374	778.547	723.54	630.557	675.947	621.515	1.37873	1.03349	Q06485
sp|Q03697|YMD8_YEAST	122.471	151.731	133.067	105.272	152.21	703.135	626.827	639.425	522.792	652.072	0.719562	1.03346	Q03697
sp|P53881|RM22_YEAST	329.421	292.614	354.171	349.047	357.702	433.473	426.672	395.006	402.273	504.487	1.10812	1.03335	P53881
sp|P11021|GRP78_HUMAN	451.941	451.16	429.217	466.918	455.72	283.284	357.371	292.481	328.776	269.355	1.26371	1.03333	P11021
sp|P38166|SFT2_YEAST	145.111	85.9353	192.851	164.335	173.334	634.242	433.401	665.924	586.184	727.943	1.15389	1.033	P38166
sp|P38719|DBP8_YEAST	431.039	530.845	381.04	424.721	414.751	264.673	447.395	308.312	354.84	287.671	1.37256	1.03255	P38719
sp|Q06668|OMS1_YEAST	89.3052	104.845	92.184	100.719	118.938	623.429	633.847	613.365	691.744	755.21	0.866018	1.03222	Q06668
##sp|P53285|VPS62_YEAST	649.353	669.257	611.043	590.125	688.269	134.875	138.221	138.897	138.44	122.888	0.994334	1.03205	P53285
sp|P12945|NAT1_YEAST	493.55	541.029	493.787	512.1	494.55	248.101	315.924	268.905	287.692	243.317	1.16162	1.0316	P12945
sp|P46151|MTHR1_YEAST	620.995	745.22	590.541	494.846	719.224	143.545	176.528	138.574	119.788	142.887	1.02477	1.0316	P46151
sp|Q12514|NOT5_YEAST	318.57	347.846	340.079	355.229	335.184	384.721	477.696	424.497	457.353	428.219	1.13717	1.03145	Q12514
sp|P15790|CSK21_YEAST	403.58	452.647	395.49	391.91	398.062	341.992	418.074	339.734	347.193	372.484	1.08995	1.03129	P15790
sp|P28240|ACEA_YEAST	604.948	806.442	633.802	557.178	624.5	131.776	130.054	144.617	131.102	146.32	0.740337	1.03121	P28240
sp|Q12463|TRM11_YEAST	596.845	516.665	670.688	712.358	577.733	144.293	160.168	159.751	174.946	147.561	1.28228	1.03106	Q12463
sp|P53073|EMC4_YEAST	79.4984	94.9871	98.1666	99.6934	81.6835	683.89	661.692	668.557	699.991	702.699	0.809773	1.03098	P53073
sp|Q03103|ERO1_YEAST	86.6282	114.182	88.1261	139.853	84.3133	574.968	886.331	529.298	865.692	522.754	1.16954	1.03062	Q03103
sp|P34241|URB1_YEAST	338.137	347.873	391.397	400.976	351.977	415.921	440.853	384.432	405.87	387.315	1.03028	1.03055	P34241
sp|P50276|MUP1_YEAST	148.848	110.312	172.327	117.099	141.943	737.596	371.243	728.866	510.349	630.405	0.679141	1.03043	P50276
sp|P25655|NOT1_YEAST	337.869	316.371	309.597	299.28	317.056	410.132	512.128	443.869	442.074	452.561	1.33354	1.03029	P25655
sp|P17883|SKI3_YEAST	532.135	489.51	528.963	489.391	549.497	240.413	255.463	271.523	258.776	229.283	1.15513	1.03012	P17883
sp|P53920|NM111_YEAST	582.304	743.19	602.15	704.287	633.935	109.986	123.04	119.774	144.249	109.865	0.876509	1.02969	P53920
sp|P40056|GET2_YEAST	86.6264	85.547	96.4502	82.637	92.1892	664.797	701.82	719.761	634.904	661.609	1.06901	1.02955	P40056
sp|P39744|NOC2_YEAST	330.403	347.075	333.878	332.34	306.29	456.675	471.327	420.554	430.734	433.367	0.982508	1.02895	P39744
sp|P39109|YCFI_YEAST	85.7968	70.8886	93.2028	91.7581	100.85	708.95	612.059	684.013	692.664	719.529	1.04489	1.02859	P39109
sp|P32563|VPH1_YEAST	94.1381	66.6218	103.68	98.7463	88.5398	722.504	612.15	682.464	668.504	718.347	1.1972	1.02849	P32563
sp|Q05031|DFG5_YEAST	135.259	137.137	111.021	116.735	147.037	584.812	623.515	638.748	690.549	674.154	1.05158	1.02818	Q05031
sp|P53252|PIL1_YEAST	207.213	222.108	239.754	216.491	238.003	471.517	547.059	632.892	587.573	521.457	1.0824	1.02815	P53252
sp|Q12176|MAK21_YEAST	239.788	265.972	281.109	312.986	276.341	484.444	574.362	457.709	523.934	455.294	1.06889	1.0281	Q12176
sp|P35207|SKI2_YEAST	512.592	556.006	505.273	517.783	494.426	238.128	253.394	275.079	289.723	228.049	0.981022	1.02779	P35207
sp|P53075|SHE10_YEAST	126.84	122.547	121.915	117.218	130.343	672.261	611.09	640.206	632.426	612.389	0.940857	1.02743	P53075
sp|P40210|SIP5_YEAST	255.779	261.214	266.941	321.414	283.367	506.595	495.5	433.837	536.68	497.012	0.957746	1.0274	P40210
sp|P33754|SEC66_YEAST	78.048	79.1393	85.8216	86.1055	104.422	698.677	685.119	678.894	699.419	635.381	0.967073	1.02684	P33754
sp|Q08960|TYW1_YEAST	88.9812	93.6522	90.6807	98.6014	101.867	680.728	686.102	630.918	704.335	650.815	0.957626	1.02669	Q08960
sp|Q02326|RL6A_YEAST	532.168	472.28	513.841	445.611	483.82	236.351	345.102	290.095	258.258	261.393	1.64528	1.02657	Q02326
sp|P06182|CCHL_YEAST	104.473	129.807	85.4921	91.1157	129.898	632.833	661.587	626.695	685.446	706.859	0.841407	1.02624	P06182
sp|Q12518|ENT1_YEAST	559.388	511.371	427.531	454.372	538.452	351.058	291.463	222.472	242.579	258.066	0.908203	1.02597	Q12518
sp|P0CX35|RS4A_YEAST	530.413	470.165	544.968	489.214	519.155	218.28	313.183	259.37	238.877	227.187	1.61863	1.02595	P0CX35
sp|Q07938|MTAP_YEAST	616.599	653.403	547.194	577.476	609.821	167.253	211.678	165.127	178.761	171.171	1.19433	1.0258	Q07938
sp|P38234|RFS1_YEAST	138.103	109.608	154.629	169.535	141.743	606.824	505.003	650.303	731.344	719.437	1.04856	1.02574	P38234
sp|Q02159|UBC7_YEAST	108.567	99.9158	123.45	132.612	130.355	704.228	607.935	662.156	729.103	648.82	0.938009	1.02503	Q02159
sp|P35194|UTP20_YEAST	436.025	451.778	470.682	469.443	414.039	315.536	327.656	337.61	344.843	304.702	1.0022	1.02412	P35194
sp|P07143|CY1_YEAST	83.5644	80.863	89.5551	89.7679	109.95	703.404	591.043	643.692	660.641	735.878	0.868332	1.0239	P07143
sp|P36525|RM24_YEAST	286.775	220.926	276.432	286.33	322.109	544.953	405.919	447.526	474.457	555.695	0.966883	1.02353	P36525
sp|P22213|SLY1_YEAST	179.657	186.293	171.9	164.17	177.573	649.638	583.315	571.421	558.518	588.864	0.86592	1.02344	P22213
sp|P50278|SOL1_YEAST	606.379	741.859	617.858	626.229	579.005	135.727	127.527	152.965	158.651	143.767	0.767997	1.02331	P50278
sp|P53120|YGO0_YEAST	129.487	127.176	126.856	116.12	136.843	691.504	560.226	642.074	601.152	665.071	0.824878	1.02283	P53120
sp|P43560|LAM5_YEAST	88.0312	95.0208	85.5626	90.2093	113.622	755.399	594.306	630.996	680.388	692.447	0.728873	1.02273	P43560
sp|P38968|SEC31_YEAST	539.382	520.912	561.718	563.271	507.14	224.427	239.264	228.199	233.976	269.338	1.10391	1.02249	P38968
sp|P32349|RPC3_YEAST	385.849	422.601	367.821	376.522	379.257	381.218	385.361	385.267	403.181	384.611	0.922956	1.02231	P32349
sp|P40012|PPOX_YEAST	94.5328	101.666	98.4219	101.863	123.27	667.987	636.823	637.823	674.525	696.444	0.886457	1.02182	P40012
sp|P48363|PFD3_YEAST	669.085	743.554	665.862	637.833	637.319	95.3545	98.5103	121.047	118.463	101.832	0.929629	1.02166	P48363
sp|Q12164|POM33_YEAST	108.808	80.7314	82.6719	87.4924	105.907	722.012	683.333	651.838	704.708	634.609	1.27558	1.02154	Q12164
sp|P38701|RS20_YEAST	536.491	579.834	521.012	458.964	506.532	223.22	312.833	277.192	249.373	233.328	1.2967	1.02126	P38701
sp|P17891|CLC1_YEAST	606.743	633.584	650.092	578.539	612.185	165.28	141.86	176.964	160.821	139.015	0.821944	1.02117	P17891
sp|P38883|RIX1_YEAST	519.619	533.727	536.029	556.464	527.674	234.613	243.152	232.214	246.169	216.271	1.009	1.02117	P38883
sp|P53184|PNC1_YEAST	414.491	459.919	440.406	387.769	482.169	336.597	358.479	339.718	305.328	331.353	0.959815	1.02077	P53184
sp|P80667|PEX13_YEAST	82.4045	68.5562	102.113	99.2191	85.5717	690.51	703.055	651.6	645.951	699.515	1.22384	1.02024	P80667
##sp|Q01163|RT23_YEAST	149.205	131.422	157.661	181.831	149.305	669.647	572.626	556.3	654.559	617.097	0.970825	1.02022	Q01163
sp|P50086|PSD10_YEAST	620.799	481.444	690.601	648.203	670.605	154.306	125.592	162.917	155.9	141.871	1.04951	1.01952	P50086
sp|P38966|YD089_YEAST	115.578	78.5801	107.44	97.9292	93.7797	742.349	501.951	646.774	600.997	700.534	0.994527	1.01947	P38966
sp|P13645|K1C10_HUMAN	290.93	524.146	434.767	443.507	651.316	264.47	404.663	303.096	315.175	253.586	0.849284	1.01936	P13645
sp|P48231|TCB2_YEAST	103.511	100.487	101.788	105.839	109.109	687.505	611.339	645.72	684.381	635.291	0.915973	1.01931	P48231
sp|P22804|BET1_YEAST	413.854	507.413	681.669	599.585	323.212	287.792	218.794	275.276	246.766	292.441	0.620071	1.01915	P22804
sp|P40462|TM108_YEAST	491.943	548.315	485.388	456.982	535.981	243.351	329.452	262.834	252.191	277.701	1.21463	1.01915	P40462
sp|P42838|LEM3_YEAST	106.647	50.2538	130.841	139.163	102.098	688.722	421.238	685.973	743.501	703.877	1.29797	1.01904	P42838
sp|Q12436|ZRT2_YEAST	144.525	144.998	109.543	113.754	138.233	752.291	560.589	624.176	660.43	577.149	0.742745	1.01891	Q12436
sp|Q6Q547|NOP10_YEAST	456.976	543.839	438.577	446.302	381.285	270.514	372.716	349.911	362.484	265.394	1.15774	1.018	Q6Q547
sp|Q12675|ATC4_YEAST	113.177	139.598	135.712	122.848	146.791	648.932	606.209	669.694	617.093	642.845	0.757361	1.01794	Q12675
sp|Q12134|HUA2_YEAST	145.177	134.878	136.711	157.286	158.575	593.857	624.531	587.567	688.08	632.971	1.13195	1.01788	Q12134
sp|Q08650|DGAT2_YEAST	796.83	566.792	253.08	291.81	1052.77	99.0215	377.822	128.978	151.317	192.587	5.36413	1.01749	Q08650
sp|Q12074|SPEE_YEAST	650.902	528.502	699.93	646.463	608.127	140.667	142.524	146.516	137.682	152.591	1.24786	1.01742	Q12074
sp|P40471|AYR1_YEAST	99.3257	87.8931	111.74	104.621	116.958	703.124	652.843	650.856	620.001	672.836	1.04926	1.01741	P40471
sp|P39952|OXA1_YEAST	126.272	216.841	156.189	131.677	135.412	687.087	579.001	589.637	505.741	689.206	0.49072	1.01739	P39952
sp|Q12433|AHC1_YEAST	248.365	683.733	287.874	611.619	341.081	186.444	543.292	266.54	575.994	229.2	1.05849	1.01713	Q12433
sp|Q99287|SEY1_YEAST	102.387	91.7529	109.808	102.963	110.258	704.735	597.988	684.162	652.324	688.659	0.946874	1.01685	Q99287
sp|P22136|AEP2_YEAST	267.707	188.184	262.761	296.957	250.909	577.676	419.788	459.754	528.313	579.35	1.03376	1.01679	P22136
sp|P37298|DHSD_YEAST	101.849	114.545	63.7706	67.9663	107.149	785.079	736.124	560.482	607.33	679.774	0.833717	1.01669	P37298
sp|Q05942|RSA3_YEAST	388.707	489.981	403.999	458.701	422.277	317.414	362.542	323.024	372.739	326.698	0.9061	1.0163	Q05942
sp|P53878|YNS1_YEAST	101.091	65.2631	99.0824	101.726	112.206	686.356	626.183	673.763	702.939	659.813	1.41318	1.01619	P53878
sp|P10174|COX7_YEAST	118.533	164.579	124.206	140.956	160.169	666.963	541.423	639.001	736.445	560.86	0.584654	1.01555	P10174
sp|Q12532|RQC2_YEAST	446.364	511.573	466.852	560	444.101	224.652	320.394	277.51	338.024	285.084	1.24439	1.01545	Q12532
sp|Q06106|MRD1_YEAST	404.59	488.437	411.38	502.636	449.088	273.393	415.894	307.363	381.278	256.458	1.26009	1.01527	Q06106
sp|P16547|OM45_YEAST	106.163	100.227	82.7471	96.9931	104.669	868.443	773.191	528.152	628.458	576.811	0.943056	1.01515	P16547
sp|P53738|TR112_YEAST	698.657	741.502	695.703	568.671	628.851	82.9963	118.524	140.394	116.482	99.3827	1.34555	1.01502	P53738
sp|P47096|3HAO_YEAST	574.543	672.125	692.296	686.193	687.703	92.2247	110.328	129.116	129.886	106.927	1.02261	1.01491	P47096
sp|P30657|PSB7_YEAST	592.444	538.749	562.144	604.986	658.192	132.734	241.459	150.203	163.999	181.789	2.00042	1.01453	P30657
sp|P40348|RFC2_YEAST	493.756	587.475	509.066	524.684	518.527	224.308	290.059	242.828	253.772	237.399	1.08684	1.01396	P40348
sp|P38064|RM16_YEAST	463.201	477.481	491.903	482.97	412.755	272.569	370.35	306.78	305.375	286.824	1.3181	1.01383	P38064
sp|P21825|SEC62_YEAST	114.761	95.5432	104.696	93.15	122.395	680.244	648.439	693.811	625.789	612.051	1.14498	1.01376	P21825
sp|P53629|ARE2_YEAST	76.9966	85.6171	77.6493	88.3753	94.3678	683.805	695.343	632.116	729.329	662.213	0.914488	1.01376	P53629
sp|P09064|IF2B_YEAST	622.277	654.098	560.262	516.399	575.105	177.924	190.748	203.015	189.637	171.464	1.01992	1.01345	P09064
sp|Q05905|HRI1_YEAST	686.625	219.73	861.674	860.1	557.218	117.568	100.878	133.074	134.55	120.723	2.68125	1.01294	Q05905
sp|Q99382|ENV10_YEAST	86.9538	112.684	80.1085	75.0624	122.65	710.83	699.41	672.504	638.275	629.893	0.759266	1.01291	Q99382
sp|P39926|SSO2_YEAST	114.103	93.9236	110.258	129.634	137.004	671.629	604.387	619.361	737.601	616.515	1.09322	1.0129	P39926
sp|Q06053|DUS3_YEAST	630.428	625.656	575.719	559.856	591.505	173.198	193.026	175.679	173.039	179.195	1.12298	1.01288	Q06053
sp|P36126|SPO14_YEAST	201.876	197.079	203.874	201.436	237.436	521.855	548.591	591.693	591.886	556.627	1.07682	1.01243	P36126
sp|P06785|TYSY_YEAST	593.372	489.956	540.715	484.812	529.241	232.767	231.376	269.202	244.333	246.11	1.20384	1.01228	P06785
sp|Q12296|MAM3_YEAST	120.193	133.873	125.067	131.61	127.796	647.689	619.527	626.192	666.933	645.117	0.858781	1.01211	Q12296
sp|Q12153|SSF2_YEAST	465.871	566.168	457.814	477.089	448.658	286.525	343.724	260.576	274.725	289.002	0.987114	1.0117	Q12153
sp|P43594|MIC19_YEAST	109.831	94.6552	96.405	102.989	133.575	681.297	629.867	632.562	683.197	696.143	1.07273	1.011	P43594
sp|Q00711|SDHA_YEAST	132.3	114.212	137.248	137.808	150.441	695.918	643.796	581.949	590.568	660.108	1.07161	1.01069	Q00711
sp|P25349|YCP4_YEAST	115.384	100.117	105.085	109.35	132.208	652.541	608.032	644.48	677.548	682.24	1.07389	1.01031	P25349
sp|Q08745|RS10A_YEAST	512.186	488.423	536.029	475.938	499.114	239.638	308.834	291.862	261.749	268.568	1.35145	1.01006	Q08745
sp|P13856|RSR1_YEAST	141.907	191.194	136.541	132.765	171.734	656.552	523.109	592.52	581.921	593.793	0.59136	1.01004	P13856
sp|P47035|NET1_YEAST	288.704	295.822	281.045	290.417	299.119	458.887	462.391	478.11	498.983	530.766	0.983392	1.00998	P47035
sp|P53166|MRH4_YEAST	380.713	400.397	369.627	463.052	387.139	378.619	429.256	307.276	388.684	367.299	1.078	1.00972	P53166
sp|P39535|PHO90_YEAST	124.656	139.527	125.284	140.365	125.081	677.398	621.989	605.855	685.311	634.571	0.82034	1.00962	P39535
sp|P47090|YJY5_YEAST	83.549	135.293	82.22	114.879	83.402	567.936	842.187	606.681	855.77	554.698	0.915745	1.00956	P47090
sp|P33309|DOM34_YEAST	530.415	568.767	545.718	508.76	549.041	233.376	263.484	238.011	223.958	224.995	1.05288	1.00931	P33309
sp|P47165|XPT1_YEAST	606.539	569.06	640.831	688.576	707.25	93.7997	106.519	148.671	161.172	151.273	1.21039	1.00891	P47165
sp|P02407|RS17A_YEAST	519.803	510.542	557.089	517.953	493.887	220.564	286.146	259.987	243.87	227.078	1.32087	1.00889	P02407
sp|P10591|HSP71_YEAST	467.538	598.406	473.434	552.956	465.147	215.528	313.756	251.234	296.028	209.946	1.13739	1.00884	P10591
sp|P36095|VPS24_YEAST	416.657	419.925	358.172	363.952	386.557	381.41	387.233	382.105	391.641	376.712	1.00736	1.00868	P36095
sp|D6W196|CMC1_YEAST	84.7714	52.2846	116.529	126.025	90.3007	684.131	417.666	683.245	745.329	829.184	0.989841	1.00867	D6W196
sp|P08466|NUC1_YEAST	87.5832	86.7891	98.7636	105.196	111.386	677.722	616.99	657.562	706.459	711.287	0.918717	1.00867	P08466
sp|P46964|OST2_YEAST	108.649	83.0929	88.4874	85.3449	108.532	743.813	668.36	648.297	629.91	653.556	1.17492	1.00742	P46964
sp|P40015|ISC1_YEAST	101.805	75.5208	127.445	124.491	98.9059	722.225	498.106	700.909	689.542	702.03	0.929722	1.00712	P40015
sp|O75558|STX11_HUMAN	647.468	647.74	605.195	566.706	551.696	163.893	166.759	181.257	170.929	176.256	1.01706	1.00706	O75558
sp|P41057|RS29A_YEAST	568.087	604.496	587.606	514.373	491.958	194.382	297.645	227.998	200.941	190.534	1.43901	1.00681	P41057
sp|Q06522|YP147_YEAST	124.101	108.38	119.961	122.873	136.714	688.563	608.526	624.3	643.771	652.867	1.01195	1.00675	Q06522
##sp|P36052|NDUF7_YEAST	178.056	192.473	219.385	207.153	197.088	617.585	538.105	562.233	534.469	580.521	0.80604	1.00675	P36052
sp|P38879|NACA_YEAST	486.702	476.026	461.169	424.627	456.439	263.322	397.767	325.208	301.292	290.314	1.54445	1.00619	P38879
sp|P38629|RFC3_YEAST	518.674	504.973	423.619	503.974	474.608	264.269	342.756	267.432	319.898	260.627	1.33219	1.00546	P38629
sp|P40528|SYG1_YEAST	112.399	71.0331	92.1638	104.401	68.7798	818.631	590.369	597.751	680.736	678.709	1.14113	1.00534	P40528
sp|P32458|CDC11_YEAST	459.053	509.965	484.564	484.999	508.119	268.737	275.258	322.597	324.433	235.428	0.922008	1.00479	P32458
sp|P53044|UFD1_YEAST	248.467	313.221	256.331	355.122	304.959	400.856	597.697	412.324	573.636	430.213	1.1828	1.0042	P53044
sp|P46988|PFD1_YEAST	668.944	685.658	616.202	628.014	638.591	108.881	124.251	143.156	146.512	125.572	1.11334	1.00419	P46988
sp|P40217|EIF3I_YEAST	528.504	518.885	574.464	603.343	584.326	192.428	223.705	210.335	221.751	210.303	1.18409	1.00381	P40217
sp|Q06178|NMA1_YEAST	531.638	611.388	621.87	573.566	534.167	198.517	186.528	217.306	201.166	195.375	0.817046	1.00369	Q06178
sp|P09938|RIR2_YEAST	697.512	658.507	634.156	623.426	639.225	110.273	125.707	126.963	125.235	117.328	1.20749	1.00337	P09938
sp|P15700|KCY_YEAST	662.661	746.239	648.839	652.38	633.991	110.551	112.302	113.811	114.811	117.589	0.902064	1.00331	P15700
sp|P25847|MSH2_YEAST	488.464	503.968	518.888	521.454	523.81	232.82	271.97	283.5	285.77	241.275	1.13222	1.00305	P25847
sp|Q03466|EBS1_YEAST	373.631	336.602	358.176	383.352	313.555	412.385	399.102	405.843	435.476	437.254	1.07426	1.00255	Q03466
sp|P41811|COPB2_YEAST	536.834	524.762	602.78	548.405	539.606	212.132	197.798	256.887	234.296	237.408	0.95388	1.00249	P41811
sp|P53183|YGD9_YEAST	623.373	671.606	686.983	585.587	579.379	113.324	151.805	185.004	158.023	127.929	1.24336	1.00206	P53183
sp|P04840|VDAC1_YEAST	96.3485	83.3862	98.0409	95.2478	93.1578	711.944	641.81	669.361	651.582	705.224	1.04163	1.00198	P04840
sp|Q03687|YMP0_YEAST	154.209	110.659	194.486	182.277	137.527	667.609	392.761	657.498	617.357	696.46	0.81984	1.00184	Q03687
sp|P53235|EIF2A_YEAST	509.715	529.884	563.464	570.371	503.25	237.081	252.919	241.926	245.327	225.516	1.0262	1.00178	P53235
sp|P06738|PHSG_YEAST	514.317	453.716	476.014	469.384	474.147	255.276	288.627	251.211	247.94	406.161	1.28166	1.00092	P06738
sp|P38116|ARL1_YEAST	510.307	619.386	340.673	283.819	382.487	394.337	302.4	349.807	291.672	386.781	0.631806	1.00083	P38116
sp|P54964|ORN_YEAST	667.65	606.846	672.24	631.272	660.875	113.895	129.587	130.235	122.391	136.199	1.25178	1.00076	P54964
sp|Q12114|CHS5_YEAST	453.362	445.472	505.782	515.125	498.554	250.115	306.589	298.848	304.465	311.874	1.2475	1.00032	Q12114
sp|P22147|XRN1_YEAST	473.183	491.23	516.41	487.94	500.354	254.73	296.89	288.799	272.905	277.634	1.12269	1.0001	P22147
sp|P38788|SSZ1_YEAST	430.627	458.204	437.971	425.716	402.955	277.39	423.834	342.11	332.473	351.507	1.43598	0.999807	P38788
sp|P09620|KEX1_YEAST	129.541	131.162	161.084	150.656	154.099	626.308	571.124	652.538	610.127	656.908	0.900618	0.999724	P09620
sp|P31384|CCR4_YEAST	350.562	366.707	339.942	347.342	361.56	374.543	483.147	399.304	407.873	447.455	1.23317	0.999698	P31384
sp|P25373|GLRX1_YEAST	658.913	706.742	620.639	651.593	691.755	86.6761	76.8206	93.7917	98.4259	105.153	0.826315	0.999556	P25373
sp|P38851|LAM1_YEAST	87.0542	84.2588	86.2147	100.655	93.9367	734.403	622.402	652.729	761.613	619.229	0.875611	0.999416	P38851
sp|P17695|GLRX2_YEAST	347.406	413.276	324.872	327.186	361.981	455.282	385.586	407.322	409.809	422.768	0.71193	0.99899	P17695
sp|Q12255|NYV1_YEAST	90.8566	80.9066	93.3989	94.5466	115.154	679.284	702.112	632.217	639.278	718.592	1.16072	0.998894	Q12255
sp|P53335|PXR1_YEAST	116.004	118.664	141.725	192.94	109.463	535.013	619.793	612.328	832.391	574.521	1.1325	0.998541	P53335
sp|P25334|CYPR_YEAST	95.4271	67.2068	102.349	99.7297	102.598	685.616	614.979	692.942	673.78	691.705	1.27361	0.997888	P25334
sp|P36114|YKR18_YEAST	553.821	653.207	466.887	511.765	541.618	209.273	277.198	230.785	252.424	196.546	1.12304	0.99785	P36114
sp|Q86ZR7|YKD3A_YEAST	675.947	648.306	664.668	625.55	604.571	127.729	148.153	135.957	127.654	121.15	1.20935	0.997638	Q86ZR7
sp|P38286|MKAR_YEAST	86.783	74.6138	81.319	77.7742	93.2548	728.274	629.066	700.176	667.68	682.525	1.00466	0.997053	P38286
sp|P20459|IF2A_YEAST	582.934	588.73	619.23	574.077	566.734	188.786	193.458	207.592	191.834	178.381	1.01466	0.996774	P20459
sp|P39517|DHH1_YEAST	526.883	520.089	492.095	502.608	486.145	232.108	323.638	262.338	267.046	249.797	1.41256	0.996654	P39517
sp|Q08421|ETT1_YEAST	609.362	519.994	658.39	637.365	621.029	135.878	186.127	140.559	135.59	137.388	1.60524	0.996469	Q08421
sp|P32857|PTM1_YEAST	122.318	117.656	136.293	120.015	135.434	647.327	545.043	704.108	617.642	675.618	0.875358	0.996174	P32857
sp|P39007|STT3_YEAST	76.6489	74.0334	90.2661	87.6272	97.6285	731.222	574.065	688.674	665.943	699.303	0.812811	0.996114	P39007
sp|P25297|PHO84_YEAST	101.486	57.3478	105.878	85.7034	104.414	756.649	493.335	750.271	604.824	759.431	1.15382	0.995902	P25297
sp|P29468|PAP_YEAST	544.638	587.721	471.825	575.574	557.513	187.254	233.009	191.984	233.205	275.834	1.15313	0.995755	P29468
##sp|Q6PDB4|ZN880_HUMAN	502.396	820.133	405.64	383.877	722.244	184.248	212.84	235.982	222.363	226.753	0.707638	0.995704	Q6PDB4
##sp|Q14699|RFTN1_HUMAN	105.67	52.6894	109.809	109.854	115.561	644.145	663.706	661.71	659.048	710.953	2.06643	0.995563	Q14699
sp|P18962|DAP2_YEAST	121.106	123.459	142.896	148.676	132.679	635.571	561.227	617.669	639.777	666.509	0.8662	0.995521	P18962
sp|P53751|YN94_YEAST	126.08	147.727	166.096	166.263	195.937	481.538	505.547	689.978	687.459	696.043	0.896023	0.995344	P53751
sp|Q06218|DBP9_YEAST	463.582	547.193	475.848	507.007	477.529	262.656	323.966	279.219	295.999	276.258	1.04496	0.994944	Q06218
sp|P53145|LSG1_YEAST	552.071	602.949	550.945	576.086	522.352	192.721	250.237	211.449	219.93	201.086	1.18888	0.994718	P53145
sp|Q04491|SEC13_YEAST	427.847	100.805	600.925	555.391	292.211	397.025	238.776	385.667	354.549	426.009	2.55258	0.994684	Q04491
sp|P25303|SCJ1_YEAST	162.715	182.217	176.286	172.326	182.72	616.575	654.905	555.305	539.857	544.621	0.948487	0.99452	P25303
sp|P53296|ATF2_YEAST	161.932	115.013	137.163	151.361	120.131	758.437	639.358	567.173	622.44	598.275	1.18689	0.994502	P53296
sp|P11792|SCH9_YEAST	505.61	327.616	649.231	675.327	461.103	245.769	201.349	240.935	249.18	276.617	1.26437	0.994255	P11792
sp|P36154|AIM29_YEAST	645.727	678.51	709.461	616.082	693.481	92.6133	115.445	110.352	95.2715	122.462	1.1863	0.994201	P36154
sp|P39685|PO152_YEAST	94.3139	87.4054	84.0541	84.8148	106.842	720.717	632.377	644.794	646.787	702.452	0.946779	0.994095	P39685
sp|Q04201|CUE4_YEAST	81.1327	56.4527	89.5701	76.1232	95.6254	713.834	680.037	729.573	616.085	671.401	1.36913	0.993615	Q04201
sp|Q08986|SAM3_YEAST	84.9671	67.1476	99.9176	101.202	95.439	721.558	467.286	710.754	715.223	756.733	0.819468	0.993521	Q08986
sp|Q12402|YOP1_YEAST	119.778	123.592	116.231	94.3898	100.766	653.848	675.978	701.306	565.829	576.756	1.00194	0.993519	Q12402
sp|P53914|NAT10_YEAST	365.969	420.057	413.053	458.658	381.898	331.339	464.405	359.388	396.34	301.631	1.22112	0.993164	P53914
sp|Q03516|RSN1_YEAST	95.2403	110.257	94.85	121.602	110.079	637.649	673.756	642.07	816.988	579.506	0.912713	0.992503	Q03516
sp|P32583|SRP40_YEAST	127.527	88.4152	156.056	189.75	128.315	608.555	511.035	624.63	753.774	605.406	1.21122	0.992468	P32583
sp|P53912|YNN4_YEAST	638.403	703.302	658.796	659.221	699.71	107.395	99.2643	134.993	133.964	122.837	0.839001	0.991738	P53912
sp|P22141|PSB4_YEAST	600.429	621.168	628.883	650.672	595.708	126.45	188.428	157.619	161.724	147.787	1.44039	0.991688	P22141
sp|P38822|BZZ1_YEAST	292.876	262.043	330.438	314.964	289.826	535.96	413.012	489.227	462.376	437.587	0.861274	0.99155	P38822
sp|P53136|NSA1_YEAST	410.972	456.563	423.901	431.833	391.86	382.893	375.687	320.816	323.944	358.702	0.883201	0.991202	P53136
sp|P52488|UBA2_YEAST	613.91	783.386	640.112	659.414	645.427	94.157	111.836	103.921	106.111	135.644	0.930803	0.991191	P52488
sp|P38881|NVJ1_YEAST	103.835	113.08	85.1006	92.0641	149.85	699.055	663.162	610.353	654.261	666.504	0.871102	0.99086	P38881
sp|P32191|GPDM_YEAST	109.778	104.525	72.1656	75.4691	87.9952	905.825	818.346	519.026	537.777	586.859	0.948827	0.990773	P32191
##sp|P27816|MAP4_HUMAN	758.022	761.721	663.611	593.739	640.032	80.4158	99.3147	105.68	93.6222	95.115	1.22902	0.990156	P27816
sp|P40518|ARPC5_YEAST	600.031	569.368	756.889	685.401	727.888	113.575	90.0059	108.234	97.036	110.622	0.835161	0.990051	P40518
sp|P48589|RS12_YEAST	595.674	535.371	594.988	527.22	502.832	275.134	240.987	260.681	228.686	256.056	0.974549	0.990026	P48589
sp|P32331|YMC1_YEAST	120.447	110.145	105.213	104.016	125.51	701.102	638.077	625.115	611.765	680.06	0.99523	0.989912	P32331
sp|P38687|SRP68_YEAST	380.48	380.756	369.634	369.836	369.454	386.452	428.463	418.091	413.96	386.622	1.10791	0.989578	P38687
sp|P40318|DOA10_YEAST	77.4547	95.2971	79.0408	88.1542	85.5926	691.285	637.834	669.03	738.255	638.914	0.749926	0.989394	P40318
sp|Q12466|TCB1_YEAST	110.943	101.471	119.71	118.523	114.373	681.009	552.258	679.636	665.585	646.662	0.886641	0.989129	Q12466
sp|Q04489|ASND1_YEAST	562.71	668.798	543.487	534.881	530.36	206.945	201.151	211.663	205.99	216.291	0.817816	0.988854	Q04489
sp|P47075|VTC4_YEAST	92.5644	77.524	95.1392	92.1117	104.523	710.062	611.65	669.592	641.001	737.003	1.02852	0.988764	P47075
sp|Q06090|RM51_YEAST	318.401	332.147	278.715	250.358	289.852	496.122	422.542	491.223	436.018	528.045	0.816441	0.98815	Q06090
sp|P53834|HCH1_YEAST	659.054	764.021	632.061	646.251	682.925	83.603	98.6856	94.2232	95.1834	107.853	1.01823	0.988009	P53834
sp|P39702|VPS8_YEAST	408.947	70.8549	445.71	402.415	316.197	424.932	232.06	493.273	439.944	568.821	3.15194	0.987845	P39702
sp|P15705|STI1_YEAST	578.31	643.437	617.795	724.991	589.39	100.674	128.314	124.515	144.334	113.437	1.14554	0.987777	P15705
sp|P33307|CSE1_YEAST	599.203	557.609	600.451	557.426	547.264	197.76	180.495	205.49	188.432	215.608	0.980779	0.987766	P33307
sp|Q06252|YL179_YEAST	669.499	731.141	686.697	670.199	757.831	76.7635	77.8832	81.1967	78.2683	87.8469	0.929047	0.987663	Q06252
sp|P06103|EIF3B_YEAST	548.983	542.534	559.856	526.213	531.397	195.556	258.678	248.973	231.028	218.948	1.3385	0.987254	P06103
sp|P39993|GEA2_YEAST	475.609	501.341	449.745	440.44	439.102	327.892	272.431	318.54	307.723	335.18	0.78821	0.986453	P39993
sp|Q06685|VIP1_YEAST	497.164	588.271	540.526	498.083	540.068	218.729	212.692	236.327	214.818	217.934	0.821799	0.986445	Q06685
sp|P36000|AP1B1_YEAST	367.159	402.207	357.772	363.556	388.416	312.042	505.061	397.088	398.017	352.721	1.47752	0.986394	P36000
sp|Q08193|GAS5_YEAST	89.8618	85.2431	99.84	98.4425	109.911	723.034	691.355	663.052	644.786	653.353	1.008	0.986257	Q08193
sp|P42840|YN60_YEAST	87.1555	46.6902	108.954	123.416	53.5352	717.654	544.915	689.351	769.889	691.842	1.41737	0.985968	P42840
sp|Q02206|RSC4_YEAST	456.876	421.2	486.48	488.567	467.757	271.293	307.084	324.037	320.785	276.985	1.2278	0.985736	Q02206
sp|P32453|ATP11_YEAST	380.686	455.047	426.875	393.553	483.727	306.375	326.424	325.515	295.772	361.882	0.891331	0.985563	P32453
sp|P0CT04|IPB2_YEAST	812.943	845.245	527.782	572.092	623.16	109.044	115.254	95.075	101.55	101.142	1.01655	0.985378	P0CT04
sp|P38627|URA8_YEAST	588.569	694.713	598.125	617.262	523.656	147.791	171.789	172.863	175.768	156.078	0.984781	0.985282	P38627
sp|P40010|NUG1_YEAST	460.776	511.517	485.238	509.649	450.939	295.537	333.536	291.398	301.549	291.63	1.01663	0.985271	P40010
sp|P29366|BEM1_YEAST	473.222	495.253	439.333	466.796	460.542	270.046	359.715	298.597	312.475	300.541	1.2728	0.984909	P29366
sp|Q03921|DOP1_YEAST	292.632	252.609	290.647	254.896	247.473	518.34	437.544	538.215	464.645	525.295	0.97787	0.984392	Q03921
sp|O13563|RPN13_YEAST	595.389	569.855	577.84	575.1	573.086	204.406	204.401	200.373	196.278	230.478	1.04478	0.984232	O13563
sp|P39003|HXT6_YEAST	85.1032	56.1588	76.0601	88.7249	117.876	654.234	534.143	606.14	695.864	827.068	1.23723	0.984152	P39003
sp|P02309|H4_YEAST	150.228	142.976	166.987	155.13	179.778	487.579	641.482	719.855	658.113	515.046	1.38237	0.984105	P02309
sp|Q05779|COQ9_YEAST	164.891	173.858	187.911	200.467	235.385	587.563	582.704	529.098	555.438	623.219	0.940582	0.984032	Q05779
sp|P28239|IPYR2_YEAST	410.435	288.64	449.37	489.293	414.238	374.765	251.01	370.094	396.12	394.548	0.952397	0.982992	P28239
sp|P14772|BPT1_YEAST	92.2552	81.6077	90.6217	98.221	85.3607	686.48	609.369	646.397	688.006	716.209	1.00349	0.982021	P14772
sp|P47159|YJ94_YEAST	84.6069	130.926	83.007	75.5978	103.652	719.35	702.512	646.495	577.922	695.876	0.631092	0.981543	P47159
sp|P31383|2AAA_YEAST	548.763	476.123	596.687	555.219	538.659	237.513	212.397	237.857	217.235	210.46	1.03069	0.981512	P31383
sp|Q12186|BBP_YEAST	512.998	521.363	466.254	462.81	553.835	239.559	316.55	264.1	257.298	280.205	1.30019	0.981496	Q12186
sp|P12868|PEP5_YEAST	146.222	129.81	173.2	166.734	188.322	612.297	528.436	603.09	569.828	675.501	0.972156	0.98149	P12868
sp|P52911|EXG2_YEAST	98.1821	114.549	113.021	121.641	98.2264	652.79	634.692	641.255	677.206	663.61	0.833352	0.981228	P52911
sp|Q03768|GIR2_YEAST	574.845	603.728	604.935	613.608	589.039	161.951	190.337	176.748	175.876	183.296	1.11905	0.981	Q03768
sp|Q07688|YPD1_YEAST	652.311	683.581	607.254	637.847	639.439	131.985	138.769	138.765	142.981	127.546	1.0033	0.980958	Q07688
sp|P38131|KTR4_YEAST	116.888	127.699	120.353	108.82	133.945	706.316	620.684	603.412	534.899	715.722	0.804369	0.980412	P38131
sp|P25358|ELO2_YEAST	90.1938	83.5149	103.893	98.6273	85.0275	673.511	715.549	694.147	645.832	627.904	1.14738	0.98007	P25358
sp|P11484|HSP75_YEAST	526.394	518.888	514.648	481.961	486.134	241.933	305.905	276.14	253.443	244.524	1.28271	0.980052	P11484
sp|P52870|SC6B1_YEAST	84.1241	85.1828	78.5007	74.1099	75.6728	729.76	713.514	687.496	635.991	656.215	0.965586	0.979891	P52870
sp|P20447|DBP3_YEAST	469.068	546.362	450.089	455.532	458.826	237.374	379.621	308.608	306.048	273.534	1.373	0.979854	P20447
sp|P32602|SEC17_YEAST	96.0871	109.381	110.273	110.044	111.572	675.705	687.434	665.727	650.883	682.174	0.893714	0.979744	P32602
sp|Q12697|YPK9_YEAST	88.2344	75.5996	86.0784	88.4378	96.0534	713.689	663.094	657.967	662.281	703.568	1.08439	0.979702	Q12697
sp|P35197|GCS1_YEAST	399.933	357.321	481.861	459.673	437.031	345.502	353.425	364.697	340.838	375.563	1.14492	0.979691	P35197
sp|P19454|CSK22_YEAST	407.763	360.695	394.81	412.845	425.347	362.562	374.12	375.537	384.573	347.068	1.16653	0.979323	P19454
sp|P21242|PSA7_YEAST	495.058	520.497	568.839	599.392	521.013	227.122	229.518	227.382	234.64	240.504	0.96116	0.97932	P21242
##sp|O15054|KDM6B_HUMAN	635.541	675.888	636.601	628.371	715.241	116.529	120.347	116.736	112.738	121.569	0.971115	0.978406	O15054
sp|P23585|HXT2_YEAST	84.5853	68.6035	97.9563	112.655	145.47	541.89	438.18	695.187	782.084	982.576	0.996989	0.978212	P23585
sp|P43571|BST1_YEAST	276.462	198.717	311.331	292.699	303.881	499.007	533.23	486.243	447.073	482.486	1.48665	0.97797	P43571
sp|Q12324|YVC1_YEAST	111.637	73.8164	87.7706	95.6436	74.7696	739.893	512.026	675.951	720.286	732.967	1.04659	0.977873	Q12324
sp|Q06146|YL257_YEAST	732.274	622.44	722.853	646.073	699.475	79.1426	90.7822	98.5625	86.1284	93.0722	1.34948	0.977694	Q06146
sp|P38179|ALG3_YEAST	101.196	13.7006	109.02	97.3427	75.0757	799.092	461.476	746.116	651.286	730.399	4.26559	0.977612	P38179
sp|Q05812|MSC3_YEAST	188.866	170.001	228.429	192.364	200.369	583.796	518.169	637.771	524.97	568.956	0.98608	0.977456	Q05812
sp|Q03778|RIFK_YEAST	208.43	193.555	184.586	177.029	229.411	629.035	552.278	543.474	509.435	597.743	0.945449	0.977383	Q03778
sp|P32787|MG101_YEAST	240.169	220.984	234.157	276.83	289.866	534.994	519.69	445.791	515.09	566.28	1.05573	0.977342	P32787
sp|P47818|CCC1_YEAST	109.951	77.712	111.084	105.326	111.976	696.05	621.855	646.977	599.492	735.373	1.26404	0.97726	P47818
sp|Q01454|CTF4_YEAST	600.204	678.452	635.835	577.038	671.436	126.658	153.383	155.153	137.546	147.329	1.07133	0.976847	Q01454
sp|P31380|FUN30_YEAST	568.582	589.239	415.217	453.635	540.734	204.98	422.31	199.586	212.985	240.965	1.98803	0.976757	P31380
sp|P22217|TRX1_YEAST	734.256	759.764	656.517	615.904	669.573	82.9796	94.1396	104.25	95.4983	100.005	1.0964	0.976454	P22217
sp|P28791|SEC20_YEAST	222.668	206.908	216.594	214.992	275.306	565.754	545.269	545.393	528.526	516.314	1.0372	0.976294	P28791
sp|Q3E705|EFG1P_YEAST	419.809	457.225	404.318	454.704	429.61	301.039	373.457	356.531	391.352	303.047	1.13904	0.976033	Q3E705
sp|Q99316|MPD2_YEAST	97.2713	70.0775	108.484	120.219	109.139	673.561	616.338	670.486	725.191	678.447	1.27013	0.976014	Q99316
sp|P53930|AF9_YEAST	346.981	339.78	392.455	400.061	393.807	310.365	402.479	453.278	450.792	379.719	1.32427	0.97561	P53930
sp|Q2V2P2|YK065_YEAST	101.313	144.635	66.4081	103.144	110.57	872.098	929.126	420.132	636.522	456.828	0.74628	0.97545	Q2V2P2
sp|P38929|ATC2_YEAST	127.811	155.471	109.38	109.938	156.258	657.394	593.961	584.224	572.782	695.758	0.742764	0.975434	P38929
sp|P12683|HMDH1_YEAST	86.5738	97.2034	86.6842	85.5043	92.7432	726.573	733.945	646.119	621.419	649.545	0.899684	0.975044	P12683
sp|Q04991|FMP42_YEAST	80.7697	92.7899	95.1876	87.4618	106.769	688.099	602.802	643.74	576.72	744.865	0.762555	0.975027	Q04991
sp|P39707|SEN34_YEAST	240.017	215.585	156.332	189.546	185.862	546.984	539.139	552.557	653.172	587.801	1.09736	0.974953	P39707
sp|P43585|VTC2_YEAST	98.8148	88.9767	102.052	94.1153	105.147	697.524	621.084	683.053	613.99	730.406	0.988864	0.974697	P43585
sp|P38993|FET3_YEAST	206.556	182.099	164.782	84.8203	173.992	738.715	542.93	774.997	388.662	504.928	0.833677	0.974277	P38993
sp|Q05029|BCH1_YEAST	458.577	442.478	529.047	475.193	434.462	275.797	298.291	318.785	278.945	343.975	1.12091	0.974193	Q05029
sp|P38089|PP2C4_YEAST	266.007	225.404	273.849	277.064	217.74	515.022	477.298	551.293	543.364	495.545	1.09369	0.974179	P38089
sp|P32623|CRH2_YEAST	95.0218	63.0249	96.7566	98.7244	97.9425	711.053	605.549	698.826	694.611	663.437	1.28398	0.974158	P32623
sp|P07170|KAD2_YEAST	748.715	766.835	670.366	626.946	676.065	79.6249	75.474	91.4012	83.252	89.3864	0.925471	0.973924	P07170
sp|P07702|LYS2_YEAST	639.396	662.094	594.018	591.133	620.556	139.657	171.5	160.574	155.577	174.538	1.18591	0.973608	P07702
sp|P05374|CHO2_YEAST	99.4193	104.03	83.4126	79.736	91.7056	775.994	634.161	645.49	600.633	668.663	0.781002	0.973413	P05374
sp|P81450|ATP18_YEAST	90.3722	99.8747	89.5202	100.785	108.98	621.391	709.774	684.306	749.626	606.275	1.03356	0.973018	P81450
sp|P36037|DOA1_YEAST	573.474	688.976	547.034	564.411	584.677	150.837	215.068	185.618	186.336	195.53	1.1868	0.972962	P36037
sp|Q12144|PER33_YEAST	97.8385	98.2446	81.5338	103.239	97.1401	709.874	627.588	633.915	780.922	623.647	0.88043	0.972902	Q12144
sp|P38778|SMF2_YEAST	122.76	135.453	126.832	109.889	127.343	729.502	530.616	694.285	585.175	643.065	0.659211	0.972792	P38778
sp|Q04602|VBA4_YEAST	116.093	120.878	101.784	108.403	108.985	695.698	720.875	609.663	631.579	642.936	0.99517	0.972693	Q04602
sp|P34909|NOT4_YEAST	312.436	285.67	301.696	330.872	332.338	398.896	518.687	440.429	469.801	470.933	1.42214	0.972628	P34909
sp|P40037|HMF1_YEAST	697.245	652.919	693.645	630.78	683.93	92.5604	97.5195	116.317	102.879	107.818	1.1251	0.972622	P40037
sp|P25808|SPB4_YEAST	427.493	485.842	407.456	410.817	431.183	412.213	315.48	299.708	293.86	382.075	0.673419	0.97247	P25808
sp|P15565|TRM1_YEAST	230.02	258.684	243.439	231.124	230.65	494.315	522.868	523.181	482.66	601.747	0.940554	0.971706	P15565
sp|Q03212|EAR1_YEAST	141.68	105.941	146.283	150.607	133.368	639.141	552.629	647.365	647.626	666.978	1.15633	0.971681	Q03212
sp|P49957|TRM9_YEAST	519.47	500.906	725.507	670.914	614.132	184.809	189.003	167.736	150.701	126.706	1.0606	0.971547	P49957
sp|P21243|PSA1_YEAST	608.274	685.374	554.005	620.108	571.037	140.781	201	167.877	182.544	173.362	1.26713	0.971454	P21243
sp|P39953|YEA6_YEAST	618.448	141.677	955.644	946.976	343.599	149.677	97.2497	191.228	184.023	164.741	2.8362	0.971132	P39953
sp|Q08919|TRE1_YEAST	170.373	172.494	167.169	159.717	158.253	626.005	530.005	615.152	570.691	630.794	0.836235	0.971011	Q08919
sp|P38759|VPS29_YEAST	327.046	421.252	349.99	351.588	332.876	356.863	485.135	422.139	411.667	395.758	1.05543	0.97076	P38759
sp|Q12266|YB11A_YEAST	168.147	168.236	169.639	165.605	149.877	615.751	661.214	620.269	587.419	574.317	1.07327	0.970109	Q12266
sp|Q03723|OST6_YEAST	81.5537	69.1904	99.0201	98.1329	80.9329	737.442	593.742	670.761	644.853	705.525	0.949003	0.970067	Q03723
sp|P41920|YRB1_YEAST	698.336	1031.53	433.389	408.284	901.858	77.7054	133.062	94.4099	86.2262	95.3175	1.15926	0.969476	P41920
sp|Q58EX7|PKHG4_HUMAN	650.269	506.416	840.011	780.906	426.974	125.128	88.8892	148.672	133.908	143.413	0.912182	0.968867	Q58EX7
sp|P12688|YPK1_YEAST	481.45	468.332	480.113	455.157	458.891	286.757	291.713	317.224	291.273	301.085	1.04578	0.96854	P12688
sp|P28778|RT06_YEAST	348.818	531.133	395.772	400.481	455.236	364.567	389.342	303.545	297.464	382.139	0.701374	0.968443	P28778
sp|Q12743|DFM1_YEAST	94.9046	77.1922	115.823	97.1552	93.0264	698.309	682.488	713.878	579.763	680.877	1.20161	0.968175	Q12743
sp|P17536|TPM1_YEAST	646.522	963.461	755.21	538.955	677.033	62.2241	42.2057	98.0421	67.7388	55.907	0.455157	0.968144	P17536
sp|P47008|SFH5_YEAST	281.546	260.114	271.072	279.079	260.752	466.881	491.313	512.105	510.259	503.441	1.13904	0.967809	P47008
sp|Q08972|NEW1_YEAST	482.465	509.386	521.585	517.629	474.87	237.111	306.449	280.544	269.428	256.469	1.22413	0.967718	Q08972
sp|Q02354|UTP6_YEAST	275.257	296.297	307.688	386.186	299.458	411.27	528.802	430.267	522.529	387.89	1.19447	0.967579	Q02354
sp|P32463|ACPM_YEAST	315.198	377.345	250.864	261.98	297.978	460.231	458.996	484.053	489.064	470.229	0.833062	0.967484	P32463
sp|P36010|NDK_YEAST	683.759	297.308	772.203	760.807	595.198	119.591	96.0367	159.74	152.248	140.393	1.84687	0.967378	P36010
sp|P43583|BLM10_YEAST	610.892	466	612.17	639.021	545.16	198.088	161.095	200.482	202.293	216.589	1.06611	0.966636	P43583
sp|P33753|TRM2_YEAST	625.876	714.168	613.391	636.514	599.477	115.306	180.035	130.102	130.498	112.968	1.36833	0.966608	P33753
sp|P07213|TOM70_YEAST	114.149	112.31	114.097	122.995	130.323	647.784	632.872	633.693	660.105	661.596	0.992979	0.966315	P07213
sp|P25338|YGB0_YEAST	90.8912	112.781	91.1135	122.453	110.341	616.439	679.718	614.131	797.161	642.321	0.888634	0.965823	P25338
sp|Q06151|DCPS_YEAST	635.58	734.704	544.102	584.041	657.259	138.288	141.794	145.108	150.427	154.492	0.887012	0.965769	Q06151
sp|Q04409|EMI2_YEAST	623.468	583.448	603.196	570.135	747.337	140.955	89.3792	167.658	153.036	190.959	0.67759	0.965717	Q04409
sp|Q12212|SIA1_YEAST	543.3	614.467	460.503	429.837	614.597	203.31	332.252	232.227	209.314	248.201	1.44494	0.965636	Q12212
sp|O95741|CPNE6_HUMAN	464.256	916.992	413.328	358.391	599.398	212.414	382.396	229.094	191.775	158.37	0.911428	0.965419	O95741
sp|Q04869|YM94_YEAST	557.658	539.765	606.036	596.268	733.522	187.854	124.35	160.906	152.812	199.251	0.683897	0.965254	Q04869
sp|P52871|SC6B2_YEAST	96.6513	55.1428	90.7691	69.1025	110.909	736.546	638.552	749.585	550.488	691.723	1.51955	0.964653	P52871
sp|P53981|YNB0_YEAST	653.972	711.378	643.413	620.387	659.901	112.933	121.178	134.021	124.616	107.059	0.986423	0.964336	P53981
sp|P04051|RPC1_YEAST	371.742	423.154	351.475	386.881	366.213	399.276	417.17	385.387	409.014	361.457	0.917874	0.964182	P04051
sp|P38248|ECM33_YEAST	116.191	101.512	98.6888	94.3837	105.747	660.29	576.221	675.531	622.919	663.174	0.998875	0.964177	P38248
sp|P47124|HOC1_YEAST	119.929	121.384	130.379	118.697	118.408	720.628	538.815	659.767	579.067	695.511	0.738739	0.964064	P47124
sp|P25635|PWP2_YEAST	277.507	414.074	289.706	334.415	303.473	383.589	550.699	454.172	505.268	368.422	0.962153	0.963772	P25635
sp|P53131|PRP43_YEAST	257.869	320.336	271.072	323.928	272.512	437.946	578.695	465.718	536.322	427.79	1.06371	0.963695	P53131
sp|P40350|ALG5_YEAST	95.7365	88.5843	97.1307	101.611	104.232	703.982	641.263	663.599	668.942	650.93	0.984453	0.963603	P40350
sp|P47108|URB2_YEAST	335.103	347.579	361.216	423.107	414.623	442.502	423.647	366.653	413.763	323.611	0.923025	0.963416	P47108
sp|Q12415|TFC7_YEAST	571.318	316.847	621.334	657.72	489.059	196.668	222.243	281.794	287.361	200.205	2.03762	0.963344	Q12415
sp|Q07953|SDO1_YEAST	587.721	653.284	456.061	488.374	555.443	214.991	280.159	212.28	218.981	193.294	1.17234	0.963319	Q07953
sp|P30902|ATP7_YEAST	90.6035	89.311	90.4874	95.1736	98.3099	669.342	639.216	688.842	697.658	713.075	0.968812	0.96293	P30902
sp|P04650|RL39_YEAST	549.494	190.037	534.534	476.679	452.281	291.737	313.156	393.132	337.568	288.062	3.1038	0.962879	P04650
sp|P38084|BAP2_YEAST	115.043	136.625	100.639	97.2719	120.865	727.93	652.862	611.429	568.857	621.641	0.755202	0.962581	P38084
sp|Q12443|RTN2_YEAST	110.349	87.0832	103.955	122.443	135.332	691.855	605.892	596.624	676.347	671.113	1.10972	0.96245	Q12443
sp|P81451|ATP19_YEAST	100.539	88.4371	92.6065	108.246	115.939	628.399	607.634	679.111	763.923	671.844	1.09928	0.962364	P81451
sp|Q03648|YM59_YEAST	107.229	109.409	100.125	101.737	109.136	719.018	598.533	628.307	614.287	732.233	0.815845	0.962194	Q03648
sp|P34240|ZRT3_YEAST	80.4548	109.796	85.0988	81.9805	65.6382	722.633	692.877	663.699	615.036	704.289	0.702595	0.961928	P34240
sp|P17442|PHO81_YEAST	498.826	426.166	569.799	543.118	571.42	278.172	199.596	257.848	236.33	261.841	0.839864	0.961572	P17442
sp|Q08651|ENV9_YEAST	110.334	134.126	117.512	113.505	123.6	690.096	568.583	687.717	638.634	640.015	0.677768	0.961415	Q08651
sp|P05317|RLA0_YEAST	514.939	443.911	493.365	437.608	459.481	287.833	350.016	321.553	274.192	289.211	1.41061	0.961357	P05317
sp|P40088|FTR1_YEAST	137.443	115.124	154.711	85.2454	116.719	801.623	620.984	784.775	415.662	520.51	0.924845	0.961273	P40088
sp|Q03758|BUL2_YEAST	448.063	448.186	452.793	452.443	401.43	299.559	389.971	342.127	328.622	303.334	1.30146	0.961268	Q03758
sp|P49954|NIT3_YEAST	659.163	601.411	628.051	615.366	665.557	155.836	133.658	138.617	130.516	134.56	0.94004	0.960963	P49954
##sp|O95155|UBE4B_HUMAN	724.603	872.103	616.5	552.17	639.29	78.9845	110.367	119.521	102.859	92.2871	1.16099	0.960856	O95155
sp|P35997|RS27_YEAST	531.801	498.109	509.474	450.388	437.424	245.927	349.409	301.784	256.318	286.753	1.51688	0.960765	P35997
sp|P53868|ALG9_YEAST	91.8275	88.4303	92.9153	94.1103	109.182	737.004	660.292	682.472	663.985	698.207	0.930332	0.960558	P53868
sp|P05737|RL7A_YEAST	501.909	505.143	506.03	452.372	483.865	252.957	333.758	297.924	255.548	268.524	1.31098	0.959507	P05737
sp|P25632|RSC6_YEAST	400.042	516.702	576.916	511.222	456.809	260.836	286.764	376.234	319.869	161.066	0.851183	0.959437	P25632
sp|P46995|SET2_YEAST	516.662	624.688	482.217	527.888	628.492	169.964	281.031	228.19	239.668	195.407	1.36755	0.959431	P46995
sp|P32842|VATL2_YEAST	218.703	202.848	159.722	193.247	259.855	599.304	480.256	499.206	579.219	653.354	0.863995	0.958989	P32842
sp|P43586|LOC1_YEAST	506.851	500.704	461.531	463.337	473.589	321.442	278.772	264.39	254.524	317.262	0.877902	0.958932	P43586
sp|P40491|FMC1_YEAST	386.611	367.865	493.815	518.636	442.131	375.578	315.446	283.626	285.536	366.677	0.882697	0.958554	P40491
sp|Q05022|RRP5_YEAST	268.21	305.194	283.876	316.375	281.105	439.065	533.191	471.193	503.032	451.381	1.06722	0.957906	Q05022
sp|P00044|CYC1_YEAST	436.169	432.261	566.264	583.755	508.998	258.251	317.256	264.894	261.521	288.202	1.23959	0.957684	P00044
sp|P40040|THO1_YEAST	583.444	585.136	550.924	532.564	636.47	178.708	196.716	217.282	201.129	193.132	1.09759	0.957569	P40040
sp|P38692|KIC1_YEAST	272.585	279.234	231.668	227.905	257.825	445.45	566.547	567.584	534.63	480.659	1.24157	0.957492	P38692
sp|P40341|YTA12_YEAST	84.8985	86.3055	94.9198	107.448	112.417	667.511	611.692	656.139	711.08	737.205	0.901439	0.957371	P40341
sp|P38130|KTR3_YEAST	126.602	71.1898	163.47	136.021	153.409	703.919	404.244	670.534	533.972	690.344	1.02127	0.957036	P38130
sp|P10664|RL4A_YEAST	538.153	389.958	523.02	422.027	548.854	262.133	327.52	304.497	235.104	296.757	1.72427	0.956875	P10664
sp|P32561|RPD3_YEAST	469.658	435.541	388.091	413.681	515.445	290.806	408.455	304.302	310.241	334.87	1.51458	0.95645	P32561
sp|P53250|TWF1_YEAST	602.652	564.289	645.851	494.493	649.29	190.646	203.718	198.997	145.654	166.235	1.14121	0.955978	P53250
sp|P29496|MCM5_YEAST	520.364	621.632	564.573	536.325	580.692	166.284	202.303	253.608	230.224	207.916	1.01841	0.955609	P29496
##sp|Q53ET0|CRTC2_HUMAN	559.394	628.144	557.842	619.159	595.658	168.119	164.672	186.242	197.401	202.731	0.872292	0.954951	Q53ET0
sp|P36046|MIA40_YEAST	91.2787	98.9568	79.3506	97.721	101.173	631.592	657.851	628.919	739.628	716.017	0.960759	0.95495	P36046
sp|P45978|SCD6_YEAST	550.42	600.616	568.435	594.615	583.671	176.672	245.427	214.624	214.258	204.315	1.27307	0.954342	P45978
sp|P43573|BUD27_YEAST	586.399	749.338	624.015	754.721	525.856	108.855	109.205	128.225	147.971	154.348	0.78507	0.95414	P43573
sp|P40089|LSM5_YEAST	553.682	651.628	537.883	500.837	545.296	204.9	226.901	229.58	203.924	226.655	0.940926	0.953952	P40089
sp|P40527|ATC7_YEAST	131.016	108.442	132.297	128.611	158.362	665.898	579.761	643.754	596.895	685.514	1.05188	0.953782	P40527
sp|P15436|DPOD_YEAST	509.888	369.677	619.816	614.617	483.236	197.127	227.644	290.158	274.279	263.604	1.5928	0.953272	P15436
sp|P25573|MGR1_YEAST	95.3596	112.571	89.0442	110.822	103.677	646.593	684.964	611.228	724.992	639.113	0.897379	0.953041	P25573
sp|Q12251|YP011_YEAST	205.383	220.771	206.807	159.077	222.87	522.497	362.516	559.333	409.878	619.128	0.645454	0.952668	Q12251
sp|Q06179|FMP27_YEAST	95.7408	78.8869	99.0474	95.929	98.3467	705.957	576.064	721.772	665.926	680.754	0.99034	0.95262	Q06179
##sp|C9JLR9|CK095_HUMAN	150.856	92.3341	110.514	115.692	126.782	742.573	600.629	665.764	663.899	549.992	1.32151	0.952567	C9JLR9
sp|Q12363|WTM1_YEAST	677.655	585.675	694.437	665.837	666.051	107.359	95.6666	128.196	117.065	117.92	1.03104	0.952396	Q12363
sp|P39103|COX14_YEAST	89.2142	74.9062	84.1788	106.43	116.005	671.612	608.878	630.974	759.386	710.975	1.07976	0.951893	P39103
sp|P50087|MIC26_YEAST	82.6991	54.6141	77.3293	95.8064	90.0676	694.653	631.942	656.796	774.579	709.748	1.37754	0.951885	P50087
sp|P38249|EIF3A_YEAST	564.776	540.293	566.302	545.34	530.757	196.662	245.182	245.453	224.866	217.065	1.30321	0.951343	P38249
sp|P38174|MAP2_YEAST	514.534	544.624	495.728	502.322	526.152	235.318	286.377	260.901	251.498	243.225	1.14974	0.951307	P38174
sp|P23369|RM25_YEAST	257.07	207.566	268.032	277.808	269.939	517.603	434.013	523.885	516.54	563.652	1.03849	0.951283	P23369
sp|Q03690|CLU_YEAST	371.463	367.114	392.079	384.795	387.386	335.223	463.99	401.204	374.352	388.963	1.40052	0.950734	Q03690
sp|P32380|SP110_YEAST	165.767	146.1	134.676	164.398	201.507	592.821	564.034	543.798	630.873	616.528	1.07951	0.95038	P32380
sp|P05749|RL22A_YEAST	468.106	394.684	475.268	432.596	508.183	252.884	314.502	345.981	299.199	297.278	1.47502	0.950086	P05749
sp|Q06538|CSC1_YEAST	50.2755	0	88.5341	97.324	46.9852	821.607	396.424	738.572	771.124	790.722	#DIV/0!	0.949778	Q06538
sp|P48439|OST3_YEAST	106.565	112.206	86.4616	84.8027	104.033	696.542	673.003	675.565	629.262	621.516	0.917626	0.949681	P48439
sp|P10614|CP51_YEAST	102.659	99.4815	82.6399	83.1936	94.3787	752.995	747.773	635.835	607.766	627.698	1.02479	0.949492	P10614
sp|P53093|YIP4_YEAST	209.181	161.934	172.224	141.974	160.761	601.281	641.161	635.296	497.227	598.355	1.37745	0.949428	P53093
sp|P08067|UCRI_YEAST	110.102	108.355	95.9425	101.977	120.564	653.459	684.796	639.38	645.163	662.937	1.06486	0.949332	P08067
sp|P40202|CCS1_YEAST	640.792	521.158	623.236	600.628	569.269	172.505	166.107	186.033	170.156	186.07	1.18395	0.949081	P40202
sp|P40165|NNRE_YEAST	462.405	579.256	571.012	573.867	524.412	206.076	257.867	256.429	244.479	200.173	0.998897	0.948654	P40165
sp|P52917|VPS4_YEAST	514.114	506.404	475.748	446.556	493.863	262.622	243.239	328.752	292.704	295.66	0.940297	0.948552	P52917
sp|Q03713|RCF1_YEAST	116.984	103.465	81.4457	94.4051	137.046	667.644	618.247	639.237	702.512	667.254	1.047	0.948122	Q03713
sp|Q03653|EFR3_YEAST	347.114	341.03	367.395	387.295	415.068	366.247	416.234	418.644	418.338	382.524	1.15676	0.947923	Q03653
sp|Q08985|SAM4_YEAST	732.151	689.329	654.195	645.57	559.467	131.486	106.464	115.405	107.939	124.893	0.859998	0.947795	Q08985
sp|O13535|YH11B_YEAST	198.391	215.062	215.627	225.348	181.736	565.904	558.879	580.795	574.799	544.114	0.911035	0.946984	O13535
sp|Q12285|MDY2_YEAST	545.46	505.138	523.682	492.524	531.297	242.591	269.351	263.153	234.197	239.927	1.19894	0.946264	Q12285
sp|P16451|ODPX_YEAST	327.34	348.118	317.738	319.184	352.74	491.878	499.342	387.354	368.187	421.316	0.954582	0.946214	P16451
sp|P38886|RPN10_YEAST	610.387	738.847	577.23	535.236	641.834	146.543	132.207	186.498	163.626	157.145	0.745312	0.946198	P38886
sp|P43636|ALG2_YEAST	88.0146	98.377	94.1306	84.7095	95.1536	724.429	642.752	703.143	598.645	644.489	0.793795	0.946072	P43636
sp|P0C0W1|RS22A_YEAST	520.558	494.854	528.97	491.069	466.682	251.399	336.703	269.202	236.376	259.549	1.40888	0.945832	P0C0W1
sp|P17064|FCY2_YEAST	148.404	119.055	161.911	107.151	144.835	765.188	500.33	739.386	462.47	619.106	0.815055	0.94513	P17064
sp|P40504|KTR7_YEAST	103.959	92.6416	130.267	122.385	107.438	760.577	447.972	673.536	597.986	758.415	0.660942	0.945014	P40504
sp|P05453|ERF3_YEAST	558.859	559.605	544.026	521.981	523.093	216.233	268.228	246.785	223.738	220.428	1.23881	0.944899	P05453
sp|P38121|DPOA2_YEAST	403.257	451.905	411.627	399.772	435.78	307.739	353.277	380.776	349.394	369.654	1.02439	0.944792	P38121
sp|P13186|KIN2_YEAST	407.33	448.571	424.867	420.322	450.587	316.179	373.129	354.097	330.92	339.067	1.07162	0.944652	P13186
sp|P28321|MGLL_YEAST	130.443	118.145	122.316	128.975	141.663	650.638	592.582	632.202	629.55	661.209	1.00558	0.944391	P28321
sp|P40358|JEM1_YEAST	250.52	243.983	257.503	253.662	235.97	558.737	529.572	523.202	486.466	493.843	0.973194	0.943864	P40358
sp|P29509|TRXB1_YEAST	639.59	572.639	719.192	674.568	673.519	107.009	106.176	113.375	100.369	126.148	1.10822	0.943843	P29509
sp|P13711|ACOX_YEAST	164.102	178.114	102.236	110.378	121.373	839.319	875.243	450.38	458.869	491.312	0.960766	0.943697	P13711
sp|Q03529|SCS7_YEAST	84.0708	68.9902	105.277	114.695	121.565	636.982	636.028	672.965	691.838	709.942	1.21677	0.943631	Q03529
sp|P38817|GGA2_YEAST	582.727	601.91	582.296	553.796	577.226	168.116	213.686	201.219	180.555	194.018	1.23055	0.943481	P38817
sp|P53734|DBP6_YEAST	408.961	472.567	395.644	405.689	410.502	379.463	376.825	335.409	324.469	357.991	0.859388	0.94343	P53734
sp|P14693|SAM35_YEAST	113.717	105.446	99.6973	108.917	131.869	660.948	585.22	660.894	680.897	690.188	0.95488	0.943053	P14693
sp|Q03195|RLI1_YEAST	535.16	529.485	526.015	512.547	516.344	236.304	276.328	263.7	242.213	217.588	1.18191	0.942654	Q03195
sp|Q06385|VPS74_YEAST	335.538	300.49	317.693	331.427	309.261	449.799	498.038	449.523	442.013	392.579	1.23639	0.942547	Q06385
sp|P46956|PHO86_YEAST	76.1078	89.1846	84.7798	82.4829	90.2386	706.622	651.15	714.873	655.289	665.09	0.786382	0.942178	P46956
sp|P40533|TED1_YEAST	98.939	80.8561	90.9456	94.508	95.179	715.284	595.674	683.281	668.986	621.985	1.01902	0.942174	P40533
sp|P05030|PMA1_YEAST	102.666	98.9531	102.7	114.167	110.299	672.67	613.807	680.161	712.287	623.689	0.946731	0.942053	P05030
sp|P35184|SQT1_YEAST	544.64	635.165	559.584	570.331	539.89	177.075	272.872	205.813	197.609	169.513	1.32137	0.942045	P35184
sp|P35845|OSH1_YEAST	272.97	225.534	363.129	346.044	320.991	484.706	379.407	489.377	439.14	501.47	0.947391	0.941649	P35845
sp|Q03124|RSC9_YEAST	445.757	542.415	465.65	446.598	469.332	252.409	381.124	328.53	296.696	251.873	1.24088	0.941626	Q03124
sp|P12684|HMDH2_YEAST	101.753	97.0773	87.3254	90.5169	94.7557	740.042	634.108	654.65	638.893	667.342	0.898127	0.941522	P12684
sp|P38861|NMD3_YEAST	513.051	508.539	551.42	634.358	524.917	216.374	266.53	232.815	252.039	205.244	1.24273	0.941035	P38861
sp|P32495|NHP2_YEAST	396.001	473.482	368.115	377.225	403.136	339.182	417.15	380.076	366.448	371.907	1.02861	0.940857	P32495
sp|P53295|RBG2_YEAST	511.232	548.014	519.23	577.672	565.988	193.41	277.656	218.149	228.301	194.827	1.33923	0.940661	P53295
sp|P46969|RPE_YEAST	687.661	363.024	794.686	770.936	557.411	123.349	101.831	153.171	139.765	139.131	1.56382	0.940583	P46969
sp|P12904|AAKG_YEAST	664.097	494.461	633.733	569.498	591.388	162.834	168.465	197.415	166.777	172.84	1.38952	0.940089	P12904
sp|P32901|PTR2_YEAST	114.199	102.809	109.251	89.975	135.388	750.374	550.443	730.882	565.558	668.937	0.814826	0.93958	P32901
sp|P40302|PSA6_YEAST	597.723	626.178	579.02	599.419	626.359	155.474	175.739	174.247	169.468	157.606	1.07898	0.939474	P40302
##sp|O75417|DPOLQ_HUMAN	96.3753	87.1153	79.3564	91.0171	86.2235	651.571	663.953	717.062	772.54	608.874	1.12732	0.939341	O75417
##sp|O95994|AGR2_HUMAN	937.14	355.899	615.094	784.029	458.292	157.387	135.205	123.525	147.839	116.824	2.26205	0.938949	O95994
sp|P38756|TCD1_YEAST	103.399	99.5838	111.447	113.013	117.244	732.771	607.694	654.799	623.351	657.6	0.861083	0.938783	P38756
sp|P53095|DSD1_YEAST	652.957	670.583	582.72	581.886	643.893	138.217	188.56	154.074	144.363	126.338	1.32837	0.938313	P53095
sp|Q05166|NUP59_YEAST	105.893	98.3261	114.47	115.04	110.909	696.212	649.584	631.288	595.251	663.152	1.00483	0.938245	Q05166
sp|P48570|HOSC_YEAST	738.555	715.89	616.434	602.265	579.742	126.062	140.17	125.877	115.361	108.689	1.14711	0.93802	P48570
sp|P01123|YPT1_YEAST	162.476	185.649	150.352	135.269	144.969	671.959	533.837	614.026	518.076	718.343	0.695285	0.937815	P01123
sp|P34730|BMH2_YEAST	635.69	569.182	621.035	594.895	611.417	158.479	163.834	179.08	160.828	169.478	1.15459	0.937537	P34730
sp|P38181|NU170_YEAST	101.013	114.693	99.9694	99.6097	115.414	696.33	628.413	649.41	606.645	691.968	0.794822	0.937521	P38181
sp|Q06078|UTP21_YEAST	313.68	294.939	326.075	431.774	290.837	361.917	375.217	420.985	522.438	400.87	1.10263	0.937194	Q06078
sp|P29465|CHS3_YEAST	129.625	97.9198	120.73	128.273	127.011	652.683	555.976	660.866	658.033	664.186	1.12764	0.937164	P29465
sp|P41895|T2FA_YEAST	571.233	722.097	510.231	630.276	619.146	145.405	198.187	159.004	184.012	156.831	1.07823	0.936861	P41895
sp|P38903|2A5D_YEAST	501.792	417.1	582.106	545.79	503.818	248.331	219.328	294.915	258.985	262.925	1.06255	0.936601	P38903
sp|P38011|GBLP_YEAST	547.488	514.832	584.648	552.659	488.142	248.38	237.28	265.882	235.372	250.058	1.01591	0.936491	P38011
sp|P41948|MEP2_YEAST	111.883	111.724	61.5102	82.5611	112.512	745.588	699.004	519.19	652.296	744.51	0.938851	0.93603	P41948
sp|P47117|ARP3_YEAST	588.79	612.299	537.235	588.187	594.578	177.057	175.056	198.29	203.116	180.929	0.950736	0.935602	P47117
sp|P40579|YIV5_YEAST	695.605	670.693	662.616	638.473	661.945	112.882	106.39	113.682	102.479	110.531	0.977503	0.935544	P40579
sp|P41810|COPB_YEAST	568.2	582.735	563.522	532.216	552.869	205.56	220.669	236.868	209.264	219.002	1.04672	0.935431	P41810
sp|P36520|RM10_YEAST	234.781	290.579	314.906	307.774	364.505	562.457	381.141	453.326	414.449	537.883	0.547514	0.935427	P36520
sp|P14020|DPM1_YEAST	99.2764	79.0595	105.72	95.4004	93.3077	706.423	608.08	715.475	603.924	661.352	1.08091	0.935395	P14020
sp|P25374|NFS1_YEAST	412.686	569.912	537.073	477.063	440.272	339.746	376.874	224.215	186.245	291.495	0.803255	0.935141	P25374
sp|P25617|YCQ6_YEAST	458.314	486.538	471.656	502.951	462.021	311.35	303.971	282.177	281.311	306.751	0.919664	0.934898	P25617
sp|P35723|YET1_YEAST	89.7878	98.655	82.9796	89.484	115.591	689.895	680.468	676.012	681.493	657.901	0.897683	0.934831	P35723
sp|P32466|HXT3_YEAST	83.1518	51.5113	87.2386	122.051	88.4313	583.748	466.826	701.437	917.286	719.48	1.29092	0.934721	P32466
sp|P38431|IF5_YEAST	571.288	583.826	589.903	593.079	540.3	169.108	215.559	214.175	201.263	180.505	1.24731	0.934678	P38431
sp|Q12447|PAA1_YEAST	590.737	612.513	602.378	646.555	600.786	162.274	160.6	165.776	166.306	153.012	0.954497	0.93465	Q12447
sp|P42945|UTP10_YEAST	244.443	306.06	289.366	357.342	260.251	425.449	515.539	479.366	553.211	420.575	0.9678	0.934516	P42945
sp|Q02201|OSH6_YEAST	176.233	133.645	159.514	165.133	181.874	578.43	562.804	631.135	610.489	626.35	1.28304	0.934373	Q02201
sp|P43590|YFH6_YEAST	541.457	536.773	605.643	565.673	603.187	195.201	198.5	240.314	209.658	217.622	1.02578	0.934081	P43590
sp|P32366|VA0D_YEAST	142.622	113.697	119.219	128.974	131.769	644.52	685.325	607.793	614.178	621.921	1.33383	0.934074	P32366
sp|Q01590|SED5_YEAST	185.975	180.778	175.612	175.99	198.894	593.263	558.665	595.739	557.425	603.849	0.968754	0.933673	Q01590
sp|P36527|RM28_YEAST	284.109	281.084	301.77	312.721	352.003	468.534	486.625	439.946	425.541	491.39	1.04979	0.933387	P36527
sp|P32892|DRS1_YEAST	495.953	554.335	471.383	494.016	469.709	278.352	292.936	277.962	271.893	285.788	0.941555	0.933353	P32892
sp|P06700|SIR2_YEAST	218.544	224.76	338.324	401.225	350.488	254.206	423.819	533.18	589.998	552.872	1.62112	0.933086	P06700
sp|P54837|TMEDA_YEAST	126.401	126.639	124.614	121.256	124.27	644.128	585.427	638.472	579.615	729.713	0.907167	0.932959	P54837
sp|P39515|TIM17_YEAST	97.7175	88.7727	75.6613	88.7652	81.5064	692.795	642.279	643.079	703.744	726.53	1.0205	0.932784	P39515
sp|P32915|SC61A_YEAST	130.596	96.3817	77.0301	82.3604	120.066	687.648	676.03	625.216	623.478	640.508	1.33209	0.932681	P32915
sp|Q08023|FMP25_YEAST	145.119	149.709	142.663	165.863	154.515	642.98	522.435	626.431	679.16	613.76	0.787609	0.932523	Q08023
sp|P00401|COX1_YEAST	84.966	66.4929	62.653	64.9899	93.2428	753.412	603.914	714.451	690.994	683.357	1.02426	0.932391	P00401
sp|Q06679|UTP4_YEAST	289.375	367.445	307.164	366.693	295.176	389.328	513.897	468.188	520.917	404.045	1.03951	0.932001	Q06679
sp|P10963|PCKA_YEAST	522.146	790.51	595.422	597.69	625.305	117.101	176.822	156.799	146.663	172.588	0.997381	0.931802	P10963
sp|P54783|ALO_YEAST	112.255	82.3465	139.735	136.694	124.185	694.243	562.991	692.692	631.367	668.02	1.10548	0.93174	P54783
sp|P33333|PLSC_YEAST	102.919	86.125	100.688	104.587	112.724	709.719	637.688	630.677	610.267	645.582	1.07371	0.931562	P33333
sp|P32353|ERG3_YEAST	88.6081	112.571	96.4685	98.4234	93.6188	728.096	611.917	729.179	692.95	647.434	0.66153	0.931441	P32353
sp|P38626|NCB5R_YEAST	88.4148	85.8083	91.4103	89.0405	96.6367	717.57	666.709	677.764	614.719	666.786	0.957343	0.93112	P38626
sp|P36108|DID4_YEAST	418.14	461.345	404.039	414.718	474.7	336.424	331.652	344.066	328.783	338.35	0.893495	0.930975	P36108
sp|P33894|STE13_YEAST	142.802	193.983	162.765	146.751	200.946	569.703	606.76	629.003	527.65	653.838	0.78404	0.930406	P33894
sp|Q02207|FOX2_YEAST	194.951	213.344	123.982	124.741	149.726	732.956	790.463	485.19	454.14	539.701	0.985481	0.930308	Q02207
sp|Q05787|HRD3_YEAST	131.871	111.795	176.377	165.946	129.481	605.806	535.487	653.047	571.359	738.939	1.04266	0.929904	Q05787
sp|Q02197|NAA35_YEAST	418.47	331.569	572.882	556.119	445.225	282.782	425.867	283.309	255.735	270.079	1.9007	0.92988	Q02197
sp|P21734|UBC1_YEAST	560.059	623.641	614.789	659.03	649.836	154.571	126.554	137.597	137.115	139.436	0.735273	0.929605	P21734
sp|Q02883|FMP30_YEAST	108.14	87.5408	94.5555	103.955	108.541	752.323	411.037	666.139	680.706	799.833	0.67492	0.929471	Q02883
sp|P20424|SRP54_YEAST	423.838	499.412	432.663	401.954	421.152	318.718	355.753	383.511	331.011	332.513	0.947291	0.929048	P20424
sp|Q07825|FRA1_YEAST	144.384	136.97	146.696	147.372	156.433	634.17	581.071	614.05	572.926	676.19	0.965872	0.928747	Q07825
sp|P18544|ARGD_YEAST	577.816	568.634	507.257	493.161	531.617	319.616	311.316	205.181	185.227	156.493	0.989759	0.928549	P18544
sp|P23301|IF5A1_YEAST	618.801	653.938	584.256	595.813	556.168	152.554	197.474	186.187	176.292	170	1.2249	0.928487	P23301
sp|P43621|COPD_YEAST	510.839	461.512	571.754	605.294	511.889	212.15	189.816	273.706	268.982	253.137	0.990355	0.928286	P43621
sp|Q04119|PPN1_YEAST	300.317	310.902	378.617	337.164	382.059	455.424	414.827	445.323	368.071	438.827	0.879848	0.928144	Q04119
sp|P47133|EMC2_YEAST	133.321	125.59	135.145	141.78	121.803	656.549	589.295	627.763	611.146	647.783	0.952819	0.927972	P47133
##sp|Q8IYM9|TRI22_HUMAN	96.6207	21.3254	98.4748	108.671	78.4617	719.689	465.065	709.696	726.697	792.149	2.9278	0.92788	Q8IYM9
sp|P38264|PHO88_YEAST	92.1161	87.6223	91.0868	88.5918	110.058	689.337	672.5	680.022	613.576	680.921	1.02561	0.927698	P38264
sp|P25626|IMG1_YEAST	299.633	292.369	313.807	311.335	335.691	487.926	467.146	442.89	407.546	453.913	0.981199	0.927502	P25626
sp|Q07505|DLHH_YEAST	677.034	637.012	674.751	622.019	655.714	117.508	114.624	137.227	117.318	118.825	1.03674	0.927393	Q07505
##sp|Q96R84|OR1F2_HUMAN	724.802	50.3566	886.408	887.76	501.679	133.384	108.035	177.624	164.976	152.161	11.658	0.927382	Q96R84
sp|P32339|HMX1_YEAST	82.6606	115.752	98.56	117.555	97.7105	590.323	704.397	704.687	779.429	579.315	0.852113	0.927339	P32339
sp|P0CX13|COS3_YEAST	178.933	180.484	148.216	149.752	168.918	590.462	519.258	636.654	596.461	668.54	0.871855	0.927258	P0CX13
sp|P32335|MSS51_YEAST	294.386	265.509	283.237	306.763	304.991	500.088	488.222	452.605	454.392	510.359	1.08245	0.926955	P32335
sp|P38689|KPR3_YEAST	599.05	611.302	604.459	558.058	615.845	161.04	176.997	194.058	166.07	173.088	1.07706	0.92693	P38689
sp|P07257|QCR2_YEAST	132.239	119.784	121.192	130.225	146.14	662.812	626.527	616.11	613.556	654.255	1.04354	0.926782	P07257
sp|P40098|FMP10_YEAST	94.7904	68.8162	84.0099	94.7333	92.135	653.408	674.248	673.821	704.173	728.525	1.42137	0.926749	P40098
sp|Q07915|RLP24_YEAST	500.553	586.548	459.436	445.608	471.191	299.084	261.733	252.861	227.285	310.909	0.746814	0.926749	Q07915
sp|Q12746|PGA3_YEAST	81.784	74.2582	75.7357	97.0952	94.3761	686.738	702.276	643.528	764.508	638.275	1.12627	0.926654	Q12746
sp|P35196|RER2_YEAST	135.656	92.8056	112.963	119.218	131.93	722.891	660.938	636.242	622.002	585.101	1.33645	0.92633	P35196
sp|P13586|ATC1_YEAST	125.177	121.711	133.362	122.591	136.448	693.226	568.035	632.521	538.543	719.402	0.842744	0.926228	P13586
sp|P36112|MIC60_YEAST	84.9855	75.6629	81.8905	85.9349	103.019	712.521	648.659	670.282	651.362	703.641	1.02254	0.926039	P36112
sp|P53600|COPZ_YEAST	576.681	463.35	599.759	594.163	558.926	198.466	201.421	227.577	208.764	224.506	1.26312	0.925971	P53600
sp|P35191|MDJ1_YEAST	113.374	145.592	129.426	176.749	152.851	561.815	774.796	575.881	728.124	587.312	1.07392	0.925842	P35191
sp|P21560|CBP3_YEAST	91.9725	84.4225	103.842	112.559	119.713	678.192	508.938	669.682	671.989	779.77	0.817545	0.925732	P21560
sp|P40531|GVP36_YEAST	476.644	477.893	449.295	448.568	466.468	282.098	324.205	315.277	291.384	351.992	1.14626	0.925716	P40531
sp|P00410|COX2_YEAST	82.2873	81.9911	84.3057	88.4411	102.026	714.776	645.542	669.008	649.524	715.12	0.906403	0.925479	P00410
sp|Q12452|ERG27_YEAST	107.44	109.764	96.563	108.502	110.642	697.454	673.112	612.776	637.057	643.078	0.94467	0.92523	Q12452
sp|P09435|HSP73_YEAST	284.794	900.362	273.836	881.742	319.319	147.626	531.744	144.655	430.956	128.262	1.13934	0.925228	P09435
sp|Q06705|CSR1_YEAST	404.271	355.332	386.314	377.232	373.063	388.925	361.109	426.853	385.547	414.245	1.05636	0.924979	Q06705
sp|Q04773|YMW4_YEAST	707.101	679.625	630.591	661.67	726.145	97.1616	84.9462	103.289	100.247	87.7176	0.909622	0.924963	Q04773
sp|Q03441|RMD1_YEAST	106.853	118.442	97.5251	97.9602	121.055	693.908	689.974	647.584	601.605	650.2	0.897045	0.924874	Q03441
sp|P17555|CAP_YEAST	579.84	540.771	604.21	561.166	612.52	196.878	162.66	187.04	160.649	169.303	0.885885	0.924784	P17555
sp|P53729|YN8H_YEAST	686.182	649.982	547.582	626.557	541.558	117.648	171.324	183.202	193.837	170.493	1.53734	0.924692	P53729
sp|P32496|RPN12_YEAST	575.672	553.126	610.695	611.024	553.273	164.536	179.357	194.217	179.648	204.426	1.13451	0.924489	P32496
sp|P48813|GNP1_YEAST	111.117	116.364	103.016	109.782	100.782	686.71	656.874	655.035	645.33	633.183	0.913414	0.924465	P48813
sp|P07256|QCR1_YEAST	109.509	98.0164	119.461	127.121	131.233	689.845	610.093	621.73	611.542	683.218	0.98809	0.924347	P07256
sp|P53299|TIM13_YEAST	240.187	245.921	236.811	257.88	221.436	541.249	582.374	474.32	477.367	544.224	1.05089	0.924198	P53299
sp|P36027|MID2_YEAST	124.886	102.836	71.906	103.762	102.804	736.756	562.526	606.829	808.915	634.202	0.927232	0.92377	P36027
sp|P34761|WHI3_YEAST	537.378	559.604	485.822	492.996	539.976	242.448	264.546	249.291	233.59	265.83	1.04781	0.923383	P34761
sp|P51996|YPT32_YEAST	117.557	134.904	94.5098	86.7387	124.13	702.951	711.434	645.962	547.344	651.042	0.88193	0.923246	P51996
sp|Q06508|LOA1_YEAST	84.1192	82.8301	94.5468	97.4883	90.1455	677.393	710.377	684.412	651.174	681.552	1.06501	0.922728	Q06508
sp|Q05050|EIS1_YEAST	327.481	365.612	357.179	380.873	362.299	384.401	420.375	409.219	402.437	446.823	0.979533	0.922249	Q05050
sp|P0C0V8|RS21A_YEAST	561.712	527.699	606.469	560.741	523.323	175.149	259.499	240.504	204.97	190.845	1.57709	0.921753	P0C0V8
sp|P20485|KICH_YEAST	526.456	510.793	551.008	614.881	797.182	177.513	192.637	150.297	154.594	186.89	1.11848	0.921742	P20485
sp|P40364|MPM1_YEAST	204.794	190.104	174.204	201.509	212.493	628.153	641.967	506.433	539.746	598.142	1.10096	0.921364	P40364
sp|P0CX31|RS24A_YEAST	506.259	445.483	497.072	505.239	541.541	233.574	322.962	269.217	252.107	229.579	1.57133	0.92131	P0CX31
##tr|E9PPY4|E9PPY4_HUMAN	606.163	651.112	837.213	690.843	509.647	105.577	94.1672	149.622	113.732	107.881	0.830354	0.921179	E9PPY4
sp|Q01560|NOP3_YEAST	615.436	651.337	601.464	586.797	588.914	159.553	191.948	173.303	155.618	158.957	1.13673	0.920397	Q01560
sp|P38631|FKS1_YEAST	115.505	117.261	127.201	122.841	133.552	644.484	582.644	703.811	625.566	627.524	0.890507	0.920378	P38631
sp|P40303|PSA4_YEAST	620.883	646.193	600.626	646.83	589.884	108.649	186.466	168.544	167.043	149.998	1.649	0.920299	P40303
sp|Q02950|RT51_YEAST	327.015	377.678	371.734	362.735	404.639	441.723	437.428	387.562	348.022	416.834	0.85744	0.920256	Q02950
sp|P32386|YBT1_YEAST	90.9777	93.1764	93.594	96.9046	99.5022	698.204	638.793	662.21	630.668	688.57	0.89332	0.919833	P32386
sp|Q08742|RDL2_YEAST	614.491	606.758	594.058	621.031	720.945	139.437	171.832	141.59	136.152	127.282	1.24804	0.919827	Q08742
sp|P53262|VOA1_YEAST	120.728	115.547	124.026	118.031	116.771	690.055	586.921	687.707	601.773	653.49	0.888681	0.919489	P53262
sp|P49017|COQ5_YEAST	211.246	227.715	229.905	236.175	266.947	506.592	578.063	522.58	493.599	562.863	1.05856	0.919468	P49017
sp|P40319|ELO3_YEAST	90.6429	85.1374	89.8928	79.5943	95.8986	686.041	784.773	719.486	585.581	600.196	1.21789	0.919195	P40319
sp|P36101|TCD2_YEAST	112.095	119.188	110.285	119.622	126.645	696.476	639.906	623.942	621.965	657.42	0.864095	0.919024	P36101
sp|P47154|STE24_YEAST	92.1013	114.98	93.7469	97.2063	98.7818	669.439	690.168	684.489	652.272	624.112	0.82582	0.919019	P47154
sp|P47148|YJ81_YEAST	377.408	370.871	373.078	391.436	406.297	406.581	411.875	352.05	339.455	414.203	1.03088	0.919003	P47148
sp|P00128|QCR7_YEAST	91.9961	98.4814	84.4061	94.1666	109.182	686.663	599.038	674.231	690.803	686.729	0.81494	0.918379	P00128
sp|P43682|SFT1_YEAST	262.392	287.116	209.682	230.845	275.917	555.584	496.576	518.973	524.38	486.161	0.816827	0.917786	P43682
sp|P47120|DOHH_YEAST	690.486	756.468	659.94	688.888	635.22	100.91	106.334	111.766	107.063	97.5301	0.961839	0.917671	P47120
sp|P52490|UBC13_YEAST	608.861	705.858	630.564	658.366	590.202	144.146	137.155	150.062	143.767	111.525	0.820746	0.91759	P52490
sp|Q03714|USA1_YEAST	144.809	142.814	154.835	159.713	136.352	634.977	559.671	637.27	603.169	655.08	0.893718	0.917575	Q03714
sp|Q02608|RT16_YEAST	355.999	196.627	429.785	463.795	378.346	421.834	356.463	392.256	388.372	439.204	1.52995	0.917495	Q02608
sp|P53839|GOR1_YEAST	644.059	655.312	636.235	588.255	593.518	144.647	157.701	163.906	139.025	152.971	1.07153	0.917386	P53839
sp|P40064|NU157_YEAST	107.93	100.37	125.779	119.146	112.535	684.533	616.217	664.231	577.028	702.246	0.968005	0.917075	P40064
sp|Q07527|TRM3_YEAST	535.148	542.524	593.044	593.375	503.475	215.862	212.199	230.586	211.568	186.817	0.969668	0.917011	Q07527
sp|P15424|MS116_YEAST	359.975	388.732	383.887	422.633	456.503	391.369	382.217	340.111	343.36	382.457	0.904372	0.917	P15424
##sp|Q96M86|DNHD1_HUMAN	570.368	784.998	515.428	661.291	522.517	148.699	165.857	172.2	202.557	158.266	0.810422	0.916832	Q96M86
sp|P38127|RIM2_YEAST	99.5395	89.2905	92.4102	102.694	128.294	652.985	579.722	656.224	668.467	713.156	0.989706	0.916651	P38127
sp|Q03435|NHP10_YEAST	279.911	308.468	290.801	343.612	368.463	379.893	548.346	473.869	513.247	370.193	1.3098	0.916633	Q03435
sp|P37303|GLY1_YEAST	693.322	658.697	696.264	700.866	605.924	103.845	103.85	120.392	111.072	97.7421	1.05261	0.916528	P37303
sp|P40043|RGI1_YEAST	703.055	799.19	560.79	549.749	672.872	107.825	157.189	119.877	107.662	121.962	1.28246	0.916139	P40043
sp|P40327|PRS4_YEAST	538.393	587.261	561.111	623.933	518.787	177.532	242.117	209.658	213.575	197.87	1.25031	0.916118	P40327
sp|P32473|ODPB_YEAST	332.045	304.877	356.888	329.393	316.268	531.299	466.477	413.704	349.772	476.469	0.956232	0.916034	P32473
sp|P12385|ERF1_YEAST	573.578	580.273	550.404	545.751	533.166	187.114	250.454	234.358	212.713	206.823	1.32307	0.915383	P12385
sp|Q08179|MDM38_YEAST	94.4915	84.7159	86.3958	99.9802	117.83	677.383	647.634	636.83	674.575	715.948	1.06641	0.915346	Q08179
sp|Q12305|RDL1_YEAST	386.077	301.95	299.424	322.23	340.416	417.841	398.192	453.899	447.036	484.673	1.21848	0.915172	Q12305
sp|P54070|KTR6_YEAST	104.68	90.674	113.369	118.829	120.792	678.072	647.124	630.776	605.024	742.049	1.10178	0.9151	P54070
sp|P35732|DEF1_YEAST	403.377	398.715	419.731	409.444	403.353	305.938	458.79	383.368	342.115	353.484	1.51715	0.914814	P35732
sp|O43300|LRRT2_HUMAN	175.085	224.039	165.992	170.327	218.314	568.81	693.646	574.096	538.708	519.254	0.953006	0.914478	O43300
sp|Q04264|PDS5_YEAST	522.102	512.67	605.853	556.676	582.252	190.032	208.22	263.999	221.794	199.316	1.11586	0.914348	Q04264
sp|P39968|VAC8_YEAST	100.822	105.549	91.2516	96.6863	110.881	713.015	638.322	637.157	617.279	697.822	0.855149	0.914347	P39968
sp|P32939|YPT7_YEAST	116.361	129.147	100.452	102.589	105.995	693.365	711.661	632.88	590.675	644.179	0.92477	0.913866	P32939
sp|P53290|GTR2_YEAST	211.317	199.162	216.354	253.291	220.92	589.763	503.808	514.649	550.602	576.796	0.906391	0.913843	P53290
sp|Q04170|YD391_YEAST	680.323	677.558	661.488	603.427	642.851	112.325	118.554	135.329	112.802	133.507	1.05976	0.913747	Q04170
sp|P38932|VPS45_YEAST	183.977	169.708	160.969	177.945	178.497	569.219	599.106	619.607	625.762	585.314	1.141	0.913586	P38932
sp|P46781|RS9_HUMAN	554.202	545.44	490.349	458.012	519.608	207.488	300.36	284.864	243.085	229.595	1.47086	0.913585	P46781
sp|Q06639|RSC3_YEAST	419.584	482.688	477.937	520.275	413.079	276.279	324.578	353.567	351.601	280.073	1.02123	0.913515	Q06639
sp|P16649|TUP1_YEAST	686.005	354.203	844.373	738.447	618.959	83.1545	77.1014	139.375	111.348	110.136	1.79577	0.913508	P16649
sp|P38825|TOM71_YEAST	114.96	125.694	120.508	122.954	136.397	668.267	630.554	644.246	600.019	645.958	0.862987	0.912823	P38825
sp|Q12374|NCA2_YEAST	138.521	84.9663	93.5295	100.567	129.255	674.537	546.379	663.696	650.924	709.879	1.32056	0.912127	Q12374
sp|P40553|DOT5_YEAST	521.422	546.908	526.336	536.406	579.846	191.714	239.96	278.013	258.397	219.473	1.19333	0.911992	P40553
sp|P32911|SUI1_YEAST	570.406	530.589	622.607	603.106	616.433	151.987	194.559	203.816	180.024	192.277	1.37617	0.911825	P32911
sp|P0C671|CF222_HUMAN	717.537	143.281	939.576	949.976	620.38	90.8724	50.4478	92.042	84.8059	103.348	2.78015	0.911297	P0C671
sp|P36081|YKH7_YEAST	127.05	74.7526	111.497	110.696	97.5501	705.129	500.379	685.439	619.976	689.412	1.20609	0.911035	P36081
sp|P06782|SNF1_YEAST	563.407	525.94	608.041	598.233	537.157	185.466	210.635	217.333	194.778	201.022	1.21661	0.910915	P06782
sp|P32476|ERG1_YEAST	109.562	108.318	86.4998	104.986	98.8364	678.682	749.05	626.129	691.847	606.643	1.11635	0.910391	P32476
sp|P89105|CTR9_YEAST	618.625	620.002	605.255	565.553	602.555	161.151	168.467	183.079	155.667	160.088	1.04308	0.909965	P89105
sp|P53191|PIB2_YEAST	166.79	165.536	164.873	191.737	180.379	522.05	682.88	559.888	592.485	632.707	1.31798	0.909953	P53191
sp|P40025|PHM8_YEAST	599.468	572.274	673.143	679.462	644.829	134.279	134.418	149.855	137.633	138.111	1.0486	0.909896	P40025
sp|P48558|BXI1_YEAST	86.6885	18.8894	107.965	127.459	90.6151	762.216	433.928	699.974	751.673	733.914	2.61266	0.909618	P48558
sp|P54781|ERG5_YEAST	97.7533	90.8572	92.7462	102.749	100.346	696.38	691.579	661.333	666.286	618.913	1.06848	0.909411	P54781
sp|P31377|STX8_YEAST	137.032	168.143	139.217	169.487	145.77	619.005	639.186	563.323	623.621	571.257	0.841544	0.909324	P31377
sp|P39990|SNU13_YEAST	275.804	375.517	333.704	361.748	234.161	433.182	427.036	456.361	449.674	510.359	0.724043	0.908957	P39990
sp|Q99190|TECR_YEAST	87.1364	90.3219	94.0751	99.8376	94.2032	706.985	714.658	674.598	650.629	615.235	0.975203	0.908801	Q99190
sp|Q06631|BFR2_YEAST	422.593	550.547	440.949	527.603	451.048	252.185	403.939	292.771	318.332	250.011	1.22949	0.908728	Q06631
sp|Q06338|BCP1_YEAST	632.827	548.562	600.341	585.931	566.349	179.72	175.441	209.765	186.006	178.593	1.12615	0.908545	Q06338
sp|P37293|NAT2_YEAST	107.485	95.7784	91.3042	119.587	119.751	647.382	665.02	594.614	707.486	682.469	1.1528	0.908423	P37293
sp|P33775|PMT1_YEAST	88.9999	86.6055	88.3362	82.8655	93.37	727.339	629.938	714.322	608.692	657.271	0.89003	0.908383	P33775
sp|P29704|FDFT_YEAST	89.8288	72.2566	96.9723	108.939	100.035	689.429	638.077	680.635	694.148	655.244	1.15059	0.907827	P29704
sp|Q12386|ARP8_YEAST	286.721	260.61	312.467	323.717	260.602	425.83	460.496	551.596	518.754	451.853	1.18975	0.907777	Q12386
sp|Q02969|PEX25_YEAST	108.446	102.204	98.659	103.955	98.5345	675.799	601.559	686.565	656.33	672.557	0.944512	0.907261	Q02969
sp|Q06630|MHR1_YEAST	360.988	200.43	351.95	387.246	400.308	443.244	353.186	426.708	425.884	478.817	1.43512	0.9071	Q06630
sp|P13393|TBP_YEAST	452.574	500.156	440.747	449.061	482.775	262.922	355.087	348.545	322.085	261.956	1.22206	0.906977	P13393
sp|P25384|YC21B_YEAST	201.245	200.68	203.645	210.319	199.024	555.982	605.688	576.498	540.007	528.227	1.09247	0.906976	P25384
sp|P40215|NDH1_YEAST	85.906	78.6079	85.9411	94.7317	100.689	685.112	605.924	685.59	684.993	727.152	0.966527	0.906416	P40215
sp|Q12445|POM34_YEAST	101.756	100.09	90.6546	92.8194	111.289	709.252	683.075	660.109	612.549	659.799	0.97912	0.906309	Q12445
sp|P38604|ERG7_YEAST	133.201	134.385	131.202	135.66	153.434	669.801	616.224	633.502	593.451	624.045	0.911903	0.905996	P38604
sp|P40510|SER33_YEAST	659.01	698.363	692.103	610.387	673.408	115.181	120.405	151.726	121.206	127.746	0.986443	0.905794	P40510
sp|P32364|SMY1_YEAST	388.882	324.479	417.934	483.701	412.32	324.775	422.057	343.57	360.166	387.488	1.55747	0.905772	P32364
sp|P32502|EI2BB_YEAST	509.021	490.297	481.713	468.279	473.252	292.43	292.49	310.651	273.521	265.621	1.0384	0.905734	P32502
sp|Q08687|TMA16_YEAST	523.65	538.67	475.86	549.292	520.778	214.797	288.284	242.484	253.465	212.225	1.3047	0.905545	Q08687
sp|P43609|RSC8_YEAST	494.911	499.453	499.852	502.988	500.594	246.571	276.839	310.153	282.604	228.441	1.11255	0.905494	P43609
sp|Q03280|TOM1_YEAST	646.131	689.634	583.615	525.327	531.22	205.1	170.075	195.481	159.314	168.948	0.77692	0.905409	Q03280
sp|P39958|GDI1_YEAST	537.01	483.559	605.385	611.554	511.817	207.266	212.96	243.732	222.917	249.656	1.14104	0.905373	P39958
sp|P36139|PET10_YEAST	144.161	122.376	139.488	150.946	156.954	658.019	657.693	582.28	570.429	622.008	1.17743	0.905286	P36139
sp|P38694|MSC7_YEAST	110.223	93.4862	97.4311	105.438	116.957	703.33	639.238	663.212	649.708	648.032	1.07159	0.905242	P38694
sp|Q08971|YP225_YEAST	597.902	628.635	558.797	554.478	566.772	163.897	219.086	194.073	174.26	172.008	1.27138	0.904904	Q08971
sp|P47150|RT07_YEAST	380.874	441.132	400.994	445.503	433.365	377.926	319.766	300.648	301.934	410.76	0.730531	0.903943	P47150
sp|P23291|KC11_YEAST	106.729	72.3199	85.8003	101.569	118.466	683.311	598.259	682.017	729.724	644.152	1.29209	0.903839	P23291
sp|P50085|PHB2_YEAST	96.4157	104.619	79.5133	103.659	119.944	629.255	645.232	636.677	750.156	703.565	0.944986	0.903783	P50085
sp|P38736|GOSR1_YEAST	126.803	132.358	116.598	116.702	142.168	691.008	540.421	609.899	551.662	774.303	0.749252	0.903704	P38736
sp|P38428|CUE1_YEAST	85.5543	33.4164	84.4141	88.7626	74.3877	778.162	482.516	718.753	682.606	772.789	1.58753	0.903183	P38428
sp|P32642|GLRX4_YEAST	449.29	443.768	516.569	567.372	457.503	303.543	247.905	287.491	285.159	291.24	0.82687	0.903074	P32642
sp|P53875|RM19_YEAST	304.312	330.141	378.316	389.353	420.331	396.763	405.704	395.484	367.522	457.788	0.942536	0.902954	P53875
sp|P38197|YBD6_YEAST	642.388	733.066	602.9	644.958	634.054	107.808	107.518	124.053	119.819	118.752	0.873949	0.90288	P38197
sp|P40422|RPAB4_YEAST	509.371	638.372	435.305	431.154	481.071	260.54	296.882	314.303	281.029	237.799	0.909221	0.90274	P40422
sp|Q04228|UBX2_YEAST	97.2304	91.4574	97.3013	112.97	110.156	695.51	596.282	662.091	693.925	641.63	0.911447	0.902718	Q04228
sp|P30605|ITR1_YEAST	150.253	111.356	139.144	106.282	143.766	775.363	484.866	663.802	457.704	737.899	0.843777	0.902713	P30605
sp|Q92316|OST5_YEAST	105.407	118.62	80.8133	84.3323	115.375	728.43	607.922	681.536	641.816	656.989	0.741607	0.902423	Q92316
sp|P53847|DSL1_YEAST	118.523	121.984	141.245	128.734	120.122	688.682	603.833	683.177	561.748	653.513	0.851917	0.902166	P53847
sp|P53236|RSC1_YEAST	486.218	319.821	350.641	499.819	353.133	353.833	281.667	411.687	529.221	283.466	1.21021	0.901819	P53236
sp|P25040|TSR4_YEAST	590.614	584.652	646.154	661.393	517.229	157.522	191.385	189.922	175.228	159.43	1.22736	0.901375	P25040
sp|P38109|YBY9_YEAST	506.204	529.355	517.255	490.423	524.178	266.436	216.338	292.557	250.003	267.539	0.776463	0.901298	P38109
sp|P30619|SEC1_YEAST	466.161	273.7	509.783	497.192	419.006	317.86	285.04	384.551	337.984	341.085	1.52732	0.901162	P30619
sp|P37370|VRP1_YEAST	343.258	405.317	370.395	400.927	375.145	467.316	339.817	442.02	431.1	304.605	0.61583	0.901024	P37370
sp|P38773|DOG2_YEAST	679.9	533.975	690.415	697.682	728.346	92.0758	87.1712	116.205	105.802	127.708	1.20546	0.900993	P38773
sp|P09457|ATPO_YEAST	132.266	140.631	136.87	142.943	146.358	677.066	608.096	604.829	569.07	653.332	0.844709	0.900899	P09457
sp|P69771|DID2_YEAST	337.044	394.677	308.17	319.139	340.593	435.6	415.696	473.765	441.974	408.803	0.814955	0.900832	P69771
sp|Q03337|TRS31_YEAST	420.653	395.018	418.31	356.831	461.275	377.865	341.627	400.606	307.601	361.119	0.962771	0.900131	Q03337
sp|P39107|MNN9_YEAST	103.973	97.792	136.551	124.257	116.234	680.355	522.897	690.424	565.465	774.488	0.817141	0.900047	P39107
sp|P38145|RISA_YEAST	691.718	845.239	552.386	623.013	682.442	81.3513	101.643	109.268	110.906	108.291	1.0225	0.899926	P38145
sp|Q05123|ARP9_YEAST	534.274	555.259	491.675	504.623	485.795	240.36	294.83	287.687	265.622	232.31	1.18026	0.899613	Q05123
sp|P41815|BAP3_YEAST	119.241	97.7068	80.5431	89.3775	121.097	785.945	608.295	622.263	621.183	665.534	0.944548	0.899593	P41815
sp|Q06408|ARO10_YEAST	543.245	844.138	473.273	769.018	445.018	123.23	239.114	131.021	191.487	109.265	1.24874	0.899446	Q06408
sp|P32471|EF1B_YEAST	681.72	586.892	748.415	715.808	614.004	107.972	96.4668	139.3	119.821	114.904	1.03781	0.899348	P32471
sp|P38250|IST2_YEAST	89.5604	89.5909	90.2232	96.1712	100.143	748.363	626.731	678.903	650.701	642.238	0.837186	0.89918	P38250
sp|P36516|RM03_YEAST	266.556	310.304	324.511	317.061	338.2	500.992	444.778	442.707	388.844	501.479	0.762631	0.898972	P36516
sp|P38839|SPL2_YEAST	336.29	139.655	318.82	353.748	273.931	509.431	352.983	478.544	477.317	576.717	1.6685	0.898952	P38839
sp|P36148|GPT2_YEAST	101.097	94.467	82.3027	94.0696	114.546	745.726	641.149	636.286	653.711	686.301	0.920105	0.898873	P36148
sp|Q10740|LKHA4_YEAST	647.443	647.644	540.65	576.701	587.547	166.411	153.15	199.521	191.26	169.884	0.920029	0.89867	Q10740
sp|Q08822|ETFD_YEAST	112.56	108.482	114.817	120.743	126.232	674.049	583.989	654.995	618.957	684.512	0.898956	0.898602	Q08822
sp|P02994|EF1A_YEAST	604.918	600.644	576.448	577.129	543.188	168.366	189.104	197.392	177.585	178.65	1.13116	0.898591	P02994
sp|P16603|NCPR_YEAST	94.9339	81.7227	101.572	100.562	102.079	702.848	622.996	706.555	628.514	665.074	1.02968	0.898477	P16603
sp|Q99258|RIB3_YEAST	622.911	782.87	626.883	647.864	672.594	102.788	117.818	106.679	99.0335	124.699	0.912025	0.898266	Q99258
##sp|P37012|PGM2_YEAST	619.928	1405.04	100.132	63.6397	1279.04	48.9723	376.814	57.1824	32.6451	35.4264	3.3949	0.898256	P37012
sp|Q02776|TIM50_YEAST	96.0581	84.3781	89.0366	101.324	105.206	682.383	589.859	646.63	660.937	703.611	0.984066	0.898172	Q02776
sp|Q07979|RSC58_YEAST	443.457	451.465	465.703	477.479	462.888	267.117	344.781	356.176	327.851	270.609	1.26785	0.897773	Q07979
sp|P39985|DPO5_YEAST	554.186	516.594	564.053	567.079	559.85	217.645	231.389	241.335	217.821	217.224	1.14051	0.89775	P39985
sp|P32861|UGPA1_YEAST	591.803	569.358	669.275	632.314	636.248	150.071	139.941	180.203	152.751	161.513	0.969263	0.897211	P32861
sp|P42842|EMW1_YEAST	528.349	518.28	660.458	607.303	555.241	164.326	232.512	182.315	150.39	197.215	1.44244	0.897089	P42842
sp|P12686|RT13_YEAST	395.224	377.923	401.606	389.814	449.897	393.97	381.609	376.148	327.525	349.891	1.01297	0.897074	P12686
sp|P27697|COQ8_YEAST	230.217	223.039	201.719	214.076	178.789	588.689	580.792	558.676	531.679	528.9	1.01834	0.896743	P27697
sp|P05750|RS3_YEAST	513.865	508.283	508.827	452.574	485.929	257.697	333.336	302.865	241.513	267.673	1.30772	0.896546	P05750
sp|P05626|ATPF_YEAST	83.7056	87.4917	82.1976	96.0852	100.83	695.921	611.464	645.355	676.227	740.027	0.840618	0.896389	P05626
sp|Q05892|COQ11_YEAST	168.513	211.618	180.486	205.928	227.737	585.31	555.534	550.151	562.622	595.363	0.755799	0.896318	Q05892
sp|Q04697|GSF2_YEAST	90.917	78.3434	95.7341	98.3355	85.487	716.696	637.423	702.334	646.069	663.687	1.03213	0.895554	Q04697
sp|P40312|CYB5_YEAST	87.5513	66.9282	92.884	97.7618	89.8072	743.633	601.594	672.756	634.055	684.416	1.05828	0.895449	P40312
sp|P32352|ERG2_YEAST	99.6921	96.2399	107.485	117.052	131.817	649.372	696.533	628.479	612.828	693.661	1.1111	0.895406	P32352
sp|P43535|GCN20_YEAST	500.524	509.27	533.985	542.347	522.629	237.302	326.775	246.07	223.775	246.307	1.35339	0.895375	P43535
sp|P35691|TCTP_YEAST	641.894	621.194	672.369	660.302	641.979	118.672	115.168	144.416	126.964	133.403	1.00282	0.895223	P35691
sp|Q06497|ANT1_YEAST	85.2332	78.96	87.3228	95.4369	84.5056	752.805	568.577	667.328	652.735	681.276	0.815284	0.89497	Q06497
sp|P40581|GPX3_YEAST	569.901	577.674	627.099	633.186	561.719	156.364	171.191	201.484	181.979	185.628	1.08009	0.894512	P40581
sp|P53009|SCY1_YEAST	272.223	266.099	313.65	296.78	265.745	477.482	452.767	541.282	458.056	491.015	0.970059	0.894348	P53009
sp|P47100|YJ12B_YEAST	202.337	190.921	224.559	227.11	202.707	561.593	574.796	593.104	536.452	552.211	1.08471	0.894324	P47100
sp|P20795|VPS33_YEAST	319.288	341.989	317.831	295.075	309.276	421.96	466.364	481.494	399.736	495.056	1.03187	0.894223	P20795
sp|Q02725|VTC3_YEAST	90.6505	73.1448	101.043	97.4737	106.667	714.143	582.257	696.86	601.066	766.209	1.01045	0.894121	Q02725
sp|Q06144|ORM2_YEAST	128.239	113.779	101.545	115.342	113.02	649.146	674.963	659.367	669.603	585.725	1.17191	0.89405	Q06144
sp|P35176|CYPD_YEAST	451.394	459.601	450.445	432.558	456.133	357.332	346.077	334.737	287.358	296.762	0.951208	0.893959	P35176
sp|P18239|ADT2_YEAST	82.3089	52.0381	80.8346	85.0393	91.4867	693.221	561.136	714.248	671.695	762.514	1.28033	0.893924	P18239
sp|P14065|GCY1_YEAST	614.881	681.953	671.789	686.683	609.751	137.874	92.3478	141.4	129.177	173.776	0.60392	0.893745	P14065
sp|P25491|MAS5_YEAST	273.196	345.625	291.79	388.662	323.757	429.8	565.814	412.063	490.494	319.889	1.04058	0.893651	P25491
sp|Q04013|YHM2_YEAST	99.3634	88.0188	96.6053	93.4056	88.7315	719.588	695.03	696.56	601.86	678.3	1.09036	0.893644	Q04013
sp|P50613|CDK7_HUMAN	483.128	546.864	493.58	481.886	599.339	234.169	235.999	262.072	228.591	303.276	0.890353	0.893411	P50613
sp|Q04458|HFD1_YEAST	106.073	90.27	95.7655	99.1234	107.581	756.834	688.84	639.418	591.221	630.857	1.0695	0.893303	Q04458
sp|P40549|MNT3_YEAST	145.636	162.028	161.213	154.194	151.51	663.013	451.562	625.734	534.591	718.296	0.612173	0.893234	P40549
sp|P32909|SMY2_YEAST	513.025	555.703	476.549	422.102	527.385	255.282	278.862	299.999	237.281	259.455	1.00847	0.892962	P32909
sp|P39721|AIM2_YEAST	680.291	684.872	598.217	582.775	628.947	113.005	135.328	143.66	124.949	128.98	1.18952	0.892803	P39721
sp|P46965|SPC1_YEAST	83.9951	87.022	81.042	86.7245	73.2448	712.828	632.482	691.445	660.502	714.349	0.856423	0.892657	P46965
sp|P27476|NSR1_YEAST	366.905	400.436	374.76	391.471	361.351	393.634	391.925	419.004	390.639	354.43	0.912286	0.892507	P27476
sp|Q05933|ARPC3_YEAST	540.638	378.843	616.027	569.262	490.846	265.953	183.647	289.957	239.108	265.018	0.985431	0.892375	Q05933
sp|P22517|KCC2_YEAST	590.957	652.198	583.906	595.68	572.27	156.965	179.459	181.174	164.93	201.291	1.03595	0.892346	P22517
sp|P28737|MSP1_YEAST	155.313	154.654	119.762	125.407	181.476	602.336	610.557	593.015	554.072	672.9	1.01797	0.892273	P28737
sp|P06101|CDC37_YEAST	679.6	652.567	661.093	703.018	656.747	80.8482	102.037	103.733	98.3907	93.0364	1.31436	0.891938	P06101
sp|P13382|DPOA_YEAST	387.124	401.272	374.08	419.811	444.332	345.158	332.497	381.018	381.277	394.843	0.929353	0.891672	P13382
sp|P32844|SEC6_YEAST	397.712	338.1	431.433	429.671	442.832	295.236	267.011	460.073	408.516	383.887	1.06386	0.89158	P32844
sp|Q92331|VPS5_YEAST	310.915	278.144	307.464	323.211	335.911	420.107	475.223	459.14	430.177	492.526	1.26447	0.891272	Q92331
sp|P35817|BDF1_YEAST	448.262	390.861	533.454	545.909	528.657	222.952	250.031	351.091	320.168	266.609	1.28615	0.891117	P35817
sp|P38992|SUR2_YEAST	85.1027	105.24	95.9673	106.677	100.431	724.405	647.485	654.476	648.057	716.191	0.722786	0.89078	P38992
sp|Q12122|HOSM_YEAST	682.573	631.731	672.792	585.86	673.042	127.523	119.102	163.356	126.668	88.1862	1.00913	0.890465	Q12122
sp|P38146|YPT10_YEAST	111.686	119.091	108.019	102.938	112.288	762.515	546.969	654.039	554.771	756.225	0.672722	0.890093	P38146
sp|Q01163|RT23_YEAST	366.485	416.68	425.021	383.495	462.685	395.124	348.793	344.924	277.004	375.274	0.776404	0.890048	Q01163
sp|P12695|ODP2_YEAST	313.763	328.457	333.227	323.99	330.16	499.321	482.748	409.121	353.975	459.401	0.923558	0.889878	P12695
sp|P43603|LSB3_YEAST	453.505	535.022	448.061	486.424	473.489	320.081	343.573	293.621	283.639	270.343	0.909851	0.889819	P43603
sp|P06775|HIP1_YEAST	123.915	121.011	89.0066	95.5685	114.806	726.306	591.457	674.428	644.317	632.171	0.833878	0.889757	P06775
sp|Q04695|K1C17_HUMAN	337.549	694.699	383.025	598.047	532.354	249.282	337.938	222.496	309.089	242.389	0.6587	0.889717	Q04695
sp|P35180|TOM20_YEAST	100.7	74.8501	87.3677	97.8895	117.797	686.144	637.82	661.828	659.712	692.426	1.25061	0.889661	P35180
sp|Q05881|YL287_YEAST	521.016	598.098	662.671	630.88	475.8	209.353	141.21	234.179	198.314	188.717	0.587579	0.889521	Q05881
sp|P25355|CTR86_YEAST	551.341	646.397	522.229	502.447	536.544	230.503	246.746	239.116	204.634	196.91	0.91305	0.889488	P25355
sp|P47190|PMT3_YEAST	94.2856	72.0763	90.0368	96.444	91.0952	756.837	549.043	693.337	660.589	690.268	0.94898	0.889471	P47190
sp|P48559|YPT11_YEAST	161.034	159.968	126.411	142.672	154.931	638.003	591.346	601.456	603.757	657.174	0.933049	0.889421	P48559
sp|P38300|MBA1_YEAST	90.7398	77.0759	86.4009	108.537	113.953	677.957	605.279	621.407	694.265	764.059	1.05107	0.889388	P38300
sp|P48445|BPL1_YEAST	573.276	619.37	706.238	600.081	616.493	146.858	152.736	164.399	124.178	162.927	0.962624	0.888972	P48445
sp|Q03774|TRM82_YEAST	636.242	665.61	688.692	666.837	620.871	115.683	118.481	128.332	110.412	122.217	0.978992	0.888559	Q03774
sp|Q12377|RPN6_YEAST	531.112	625.154	571.903	599.668	553.945	175.209	228.382	202.919	188.963	201.866	1.1074	0.888106	Q12377
sp|P04039|COX8_YEAST	106.521	105.416	85.7764	114.791	130.548	666.239	608.423	630.362	749.085	657.414	0.922792	0.887975	P04039
sp|O74700|TIM9_YEAST	143.656	200.885	96.5155	117.954	144.471	596.858	660.657	615.87	668.347	614.166	0.791554	0.88797	O74700
sp|P07560|SEC4_YEAST	128.171	130.63	112.928	102.529	113.519	734.967	545.166	675.192	544.016	697.099	0.727796	0.887443	P07560
sp|P36060|MCR1_YEAST	274.011	216.644	261.529	262.981	240.096	522.572	518.258	541.298	483.002	502.157	1.25436	0.887376	P36060
sp|P33891|TIP20_YEAST	148.676	101.996	132.055	150.008	148.447	702.874	488.611	572.356	576.938	716.406	1.01331	0.887365	P33891
sp|P40066|GLE2_YEAST	193.055	191.172	187.146	196.29	210.041	610.463	614.795	545.329	507.533	579.118	1.01702	0.887333	P40066
sp|Q06678|RM35_YEAST	233.521	233.411	280.792	314.641	301.407	543.453	425.263	485.221	482.335	556.423	0.78289	0.887114	Q06678
sp|P16661|ALG1_YEAST	79.1047	78.757	90.679	95.1949	97.9854	684.262	606.051	729.611	679.39	684.443	0.88961	0.886993	P16661
sp|P32472|FKBP2_YEAST	526.689	479.506	532.779	504.488	569.356	245.415	280.091	251.77	211.366	254.853	1.2536	0.8866	P32472
sp|P09368|PUT1_YEAST	115.156	85.2482	131.884	161.864	185.221	605.274	541.923	576.638	627.365	807.166	1.20945	0.886459	P09368
sp|P53903|PGA2_YEAST	104.096	89.7964	87.3772	93.3901	91.9234	733.123	690.306	678.243	642.594	646.413	1.09154	0.886439	P53903
sp|P15807|MET8_YEAST	521.752	633.097	535.015	646.683	600.639	141.262	240.641	196.545	210.545	162.761	1.4039	0.886252	P15807
sp|P05373|HEM2_YEAST	615.809	619.355	675.273	673.257	650.928	107.35	138.415	143.426	126.676	123.542	1.282	0.885858	P05373
sp|Q00772|SLT2_YEAST	468.243	657.236	548.463	655.224	619.92	174.671	168.905	195.5	206.731	187.602	0.688924	0.885148	Q00772
sp|P31334|RM09_YEAST	264.765	228.908	273.197	294.169	300.986	538.945	480.132	482.769	459.729	506	1.03043	0.884385	P31334
sp|Q06706|ELP1_YEAST	571.389	482.936	632.497	609.516	529.265	195.306	190.136	220.065	187.504	203.529	1.15184	0.884167	Q06706
sp|P32497|EIF3C_YEAST	567.873	471.301	562.694	545.197	507.851	226.496	226.193	266.956	228.638	241.975	1.20329	0.883949	P32497
sp|Q05567|SGPL_YEAST	90.2694	76.9999	86.9086	99.2035	96.1167	704.505	642.945	668.306	674.06	682.895	1.06989	0.883606	Q05567
sp|Q06672|TSR2_YEAST	622.28	674.642	590.24	592.415	736.963	131.691	154.529	136.657	121.192	120.397	1.08235	0.883582	Q06672
sp|P33328|SNC2_YEAST	143.619	122.742	121.306	126.508	144.508	653.311	550.682	663.292	611.202	685.098	0.986279	0.883577	P33328
sp|Q12233|ATPN_YEAST	88.8475	76.2923	87.7119	100.949	108.862	666.506	644.169	673.718	684.895	711.054	1.12554	0.883292	Q12233
sp|P32830|TIM12_YEAST	124.631	164.935	147.027	162.714	170.775	573.72	648.13	612.29	598.521	644.495	0.85364	0.883272	P32830
sp|P39931|SS120_YEAST	135	161.672	132.945	153.884	141.5	626.723	555.29	605.172	617.953	720.766	0.739851	0.882173	P39931
sp|P02294|H2B2_YEAST	189.927	227.828	201.84	189.809	223.917	478.823	560.922	710.898	589.576	511.301	0.976579	0.88191	P02294
##sp|P52564|MP2K6_HUMAN	707.519	668.067	559.775	565.733	623.826	131.172	182.141	163.073	145.32	137.361	1.47057	0.881749	P52564
sp|P40008|FMP52_YEAST	147.043	166.549	126.72	168.526	152.121	581.354	677.532	567.26	665.157	585.575	1.02894	0.881697	P40008
sp|P47045|TIM54_YEAST	83.458	87.4463	70.9057	89.147	111.225	680.5	648.166	653.247	724.092	697.611	0.909043	0.881639	P47045
sp|P32897|TIM23_YEAST	89.6941	81.0931	86.5968	83.5675	97.8922	663.238	686.926	721.501	613.844	749.244	1.14557	0.881629	P32897
sp|P14743|NMT_YEAST	595.636	631.894	630.574	612.601	633.51	124.689	146.033	156.066	133.652	151.783	1.10398	0.881505	P14743
sp|P14904|AMPL_YEAST	447.662	394.976	501.919	471.51	442.287	314.259	296.692	366.155	303.132	386.755	1.07004	0.881271	P14904
sp|P38221|CDS1_YEAST	89.6428	111.174	89.7736	100.411	95.3554	709.598	590.222	661.175	651.691	684.424	0.670679	0.881235	P38221
sp|P40468|TAO3_YEAST	288.694	353.959	351.799	306.491	302.275	455.465	501.137	492.647	378.188	408.65	0.897398	0.881146	P40468
sp|P87108|TIM10_YEAST	111.67	128.517	99.8432	124.879	144.47	617.185	699.501	597.013	657.943	673.111	0.9848	0.881121	P87108
sp|P22696|ESS1_YEAST	535.342	549.814	520.037	540.156	604.183	176.143	218.957	251.966	230.573	248.456	1.21035	0.881009	P22696
sp|P33892|GCN1_YEAST	483.106	431.021	498.793	470.012	431.921	287.499	329.814	336.382	279.251	295.451	1.28581	0.880996	P33892
##sp|Q2LD37|K1109_HUMAN	145.334	179.317	152.796	158.904	128.623	598.627	635.538	602.31	551.342	682.94	0.860459	0.880196	Q2LD37
sp|P20449|DBP5_YEAST	583.093	588.051	559.706	547.332	560.357	203.191	220.8	225.502	194.091	203.591	1.0775	0.880167	P20449
sp|P54113|PUR91_YEAST	673.328	729.922	610.702	592.051	624.738	122.476	136.342	143.566	122.492	140.273	1.0269	0.880092	P54113
sp|P49723|RIR4_YEAST	657.41	651.191	652.642	634.595	706.872	109.974	103.269	122.71	104.98	122.568	0.948005	0.879837	P49723
sp|P32074|COPG_YEAST	536.98	516.293	561.038	540.584	521.624	220.969	227.579	260.007	220.365	241.953	1.07118	0.879603	P32074
sp|Q12044|RCN2_YEAST	608.271	688.453	629.453	674.744	624.518	112.843	123.476	145.946	137.601	136.278	0.966783	0.87953	Q12044
sp|Q3E6R5|YD381_YEAST	122.594	195.839	139.951	179.937	221.753	631.587	570.655	533.696	603.499	647.253	0.565602	0.879501	Q3E6R5
sp|P53983|ASI3_YEAST	173.948	147.241	165.694	174.207	156.715	658.826	493.457	639.018	590.878	618.765	0.884853	0.87948	P53983
sp|Q12220|UTP12_YEAST	284.968	333.536	305.789	380.393	288.145	397.793	516.362	443.504	485.197	399.724	1.10905	0.879448	Q12220
sp|P39732|GIP4_YEAST	336.17	293.824	387.558	373.957	354.672	397.794	391.83	492.728	418.086	393.8	1.12697	0.879375	P39732
sp|P43555|EMP47_YEAST	126.899	133.849	128.219	131.282	131.009	656.226	602.484	637.617	574.053	705.165	0.870433	0.879303	P43555
sp|P04046|PUR1_YEAST	616.196	527.441	602.114	580.107	626.133	170.108	200.622	177.284	150.149	180.256	1.37784	0.87907	P04046
sp|Q2LD37|K1109_HUMAN	714.138	846.985	514.92	459.273	809.049	115.755	104.469	131.365	102.997	106.772	0.760941	0.879051	Q2LD37
sp|P33322|CBF5_YEAST	390.369	277.159	446.04	478.285	326.792	383.878	331.403	431.865	406.91	412.204	1.21593	0.878695	P33322
sp|Q04371|ARMT1_YEAST	611.674	553.394	697.574	664.842	649.258	140.694	125.631	148.446	124.317	141.431	0.986976	0.878683	Q04371
sp|P21817|RYR1_HUMAN	385.61	49.964	557.218	588.39	317.129	378.745	312.396	400.861	371.861	435.243	6.36574	0.87851	P21817
sp|P47077|NOP9_YEAST	388.256	394.963	368.063	405.126	366.132	363.288	415.024	425.145	410.871	332.901	1.12301	0.878015	P47077
sp|P07245|C1TC_YEAST	568.068	525.088	530.759	489.009	520.457	232.508	274.403	263.619	213.165	247.489	1.27679	0.877647	P07245
sp|P53549|PRS10_YEAST	522.872	568.242	535.476	587.278	577.386	192.956	225.182	212.682	204.62	207.595	1.07384	0.877232	P53549
sp|P80210|PURA_YEAST	723.105	569.72	672.378	546.553	583.774	153.39	142.83	176.209	125.65	158.841	1.18185	0.877228	P80210
sp|P32621|GDA1_YEAST	128.83	109.316	137.757	124.034	132.94	684.456	514.845	654.479	516.842	748.481	0.886472	0.87707	P32621
sp|P36016|LHS1_YEAST	252.251	266.127	252.373	259.985	250.934	587.202	525.846	492.363	444.476	487.389	0.848818	0.876307	P36016
sp|P35725|YKG3_YEAST	129.492	142.75	114.226	115.997	142.379	687.673	614.384	629.24	559.901	692.07	0.810444	0.87622	P35725
sp|P32264|PROB_YEAST	584.53	626.822	635.909	603.631	664.663	143.503	165.172	169.081	140.629	162.109	1.07334	0.876196	P32264
sp|P38353|SSH1_YEAST	81.4501	99.2131	75.6027	79.6301	100.035	728.525	665.438	694.261	640.632	641.51	0.74987	0.876085	P38353
sp|P36024|SIS2_YEAST	617.742	567.454	546.283	518.117	582.075	186.25	220.757	229.254	190.45	211.682	1.29031	0.875897	P36024
sp|P25371|ADP1_YEAST	125.78	115.528	112.23	119.112	123.038	668.031	613.925	653.293	607.256	686.182	1.00057	0.875825	P25371
sp|P33298|PRS6B_YEAST	485.706	606.953	520.087	548.271	492.004	215.195	281.776	245.08	226.23	238.899	1.04783	0.875637	P33298
sp|P27616|PUR7_YEAST	785.05	605.196	699.489	563.757	631.783	150.623	100.228	136.452	96.2736	128.369	0.863181	0.875417	P27616
sp|P32528|DUR1_YEAST	593.811	731.286	573.555	580.044	650.687	152.978	142.927	155.797	137.865	166.851	0.758657	0.875004	P32528
sp|P05755|RS9B_YEAST	516.768	522.82	541.585	494.197	492.294	224.741	305.437	279.205	222.905	238.595	1.34333	0.874908	P05755
sp|Q08977|YP260_YEAST	666.176	636.857	639.017	633.241	638.522	124.396	112.402	148.811	128.983	139.015	0.945181	0.874665	Q08977
sp|P46654|RSSA2_YEAST	581.668	533.488	581.193	524.54	496.391	201.761	267.696	243.678	192.287	199.106	1.44662	0.874328	P46654
sp|Q12117|MRH1_YEAST	102.722	93.0357	94.7969	104.303	105.298	686.685	657.012	670.511	644.988	641.052	1.0564	0.874267	Q12117
sp|P40477|NU159_YEAST	246.179	285.889	239.808	249.66	253.669	580.975	535.876	478.492	435.512	534.439	0.794257	0.874256	P40477
sp|P38169|KMO_YEAST	108.191	102.905	105.143	113.451	123.846	655.033	674.604	656.082	618.839	646.718	1.08278	0.874163	P38169
sp|P38295|MCFS2_YEAST	105.884	97.7422	123.199	129.112	129.711	634.856	577.871	702.259	643.262	664.874	0.986065	0.874038	P38295
sp|P32660|ATC5_YEAST	124.513	114.774	124.28	133.447	143.364	639.177	543.106	672.162	630.704	707.737	0.921794	0.873864	P32660
sp|P53723|YN8B_YEAST	100.339	85.9167	94.0952	95.6913	88.4668	740.877	621.658	699.712	621.76	656.228	0.979936	0.873773	P53723
sp|P07258|CARA_YEAST	683.339	703.824	608.199	664.184	572.952	120.078	131.424	143.212	136.624	118.773	1.06263	0.873585	P07258
sp|P38771|RRF1_YEAST	401.434	443.937	388.296	369.734	458.405	371.992	426.286	356.64	296.63	340.726	1.03624	0.873492	P38771
sp|P42941|SERB_YEAST	650.564	676.21	601.039	599.281	633.471	122.613	110.136	181.932	158.443	148.534	0.864175	0.873448	P42941
sp|Q99996|AKAP9_HUMAN	297.234	403.534	324.083	344.349	289.304	397.564	513.866	479.863	445.313	373.245	0.952052	0.873385	Q99996
sp|P14908|MTF1_YEAST	476.112	409.138	428.001	462.561	491.33	331.416	420.122	304.163	287.09	244.265	1.47516	0.873349	P14908
sp|P47069|MPS3_YEAST	117.712	130.134	118.632	139.811	84.3857	693.631	569.015	647.348	666.261	664.228	0.742035	0.873303	P47069
sp|Q12404|MPD1_YEAST	320.669	336.032	352.586	401.211	380.767	473.384	388.301	375.504	373.131	434.517	0.782767	0.87325	Q12404
sp|P53101|STR3_YEAST	155.93	132.415	118.239	111.982	178.584	637.806	621.015	609.9	504.303	746.037	1.14658	0.873062	P53101
sp|P40897|OPT1_YEAST	116.249	0	72.329	101.852	92.4633	877.084	403.941	654.357	804.323	685.232	#DIV/0!	0.872889	P40897
sp|P53292|RT35_YEAST	353.324	313.189	404.07	438.396	430.356	418.985	392.849	352.698	333.968	396.349	1.05777	0.872755	P53292
sp|P41834|UFE1_YEAST	272.521	266.653	234.842	258.295	237.071	510.982	536.672	523.663	502.567	504.099	1.07339	0.872577	P41834
sp|Q12265|KPR5_YEAST	604.594	569.603	618.475	592.878	607.711	130.261	155.58	174.402	145.866	147.4	1.26774	0.872487	Q12265
sp|Q12018|CDC53_YEAST	464.806	533.173	505.144	551.396	481.509	261.477	278.849	269.902	256.867	265.678	0.929695	0.871875	Q12018
sp|P15202|CATA_YEAST	226.252	237.185	103.396	123.314	174.61	744.232	770.841	407.047	423.016	484.812	0.988012	0.871377	P15202
sp|P40094|COG3_YEAST	368.221	245.388	371.092	392.65	369.907	439.987	389.382	422.334	389.373	440.302	1.32798	0.871337	P40094
sp|P39524|ATC3_YEAST	139.605	132.23	137.331	146.962	128.158	651.126	595.269	660.594	615.925	617.681	0.965203	0.871279	P39524
sp|P53278|YG3A_YEAST	387.339	392.266	407.493	400.805	445.018	341.608	383.297	392.747	336.56	410.09	1.10794	0.871239	P53278
sp|Q06096|COG4_YEAST	387.583	400.119	386.832	364.432	393.188	407.556	422.44	388.361	318.704	374.905	1.00405	0.871082	Q06096
sp|P07278|KAPR_YEAST	648.196	639.568	646.873	610.523	691.344	123.035	113.166	140.672	115.643	128.789	0.932193	0.871023	P07278
sp|P38217|IMB2_YEAST	563.252	562.359	707.639	598.216	564.499	165.333	157.956	187.924	138.352	211.767	0.956897	0.870876	P38217
sp|P25443|RS2_YEAST	551.077	448.082	569.662	524.763	481.011	221.662	287.986	283.218	227.155	249.859	1.59785	0.870672	P25443
sp|P40564|DJP1_YEAST	264.028	247.202	241.687	251.928	245.722	511.773	485.392	523.218	474.707	529.808	1.01301	0.870403	P40564
sp|Q12133|SPC3_YEAST	88.588	98.8148	75.5582	80.5144	91.0371	738.918	647.493	677.396	628.272	723.775	0.785582	0.870389	Q12133
sp|Q12320|GLO4_YEAST	382.989	0	517.391	459.097	289.261	491.755	298.507	542.317	418.832	373.737	#DIV/0!	0.870364	Q12320
sp|P40019|CHZ1_YEAST	675.618	676.831	719.931	729.279	780.276	45.7876	46.639	71.38	62.8871	67.6491	1.01677	0.869726	P40019
sp|P39929|SNF7_YEAST	397.657	414.2	394.177	409.275	412.79	347.701	386.072	380.823	343.886	370.798	1.06601	0.869694	P39929
sp|P43561|FET5_YEAST	141.76	165.047	136.53	144.21	183.517	634.88	563.017	618.94	568.137	620.535	0.761686	0.869031	P43561
sp|Q03308|VPS16_YEAST	155.779	172.754	135.713	137.619	177.505	601.894	612.391	603.328	531.64	622.47	0.917466	0.868974	Q03308
sp|P32387|RM41_YEAST	245.13	257.832	254.272	283.95	310.58	525.061	432.591	502.582	487.634	538.056	0.783298	0.868851	P32387
sp|Q04651|ERV41_YEAST	142.199	111.172	136.827	146.681	140.418	723.068	555.932	618.683	576.189	637.991	0.983424	0.868746	Q04651
sp|P50623|UBC9_YEAST	574.522	27.2985	926.627	963.347	405.552	169.444	93.4471	224.28	202.446	192.831	11.6067	0.868243	P50623
sp|P08518|RPB2_YEAST	468.596	489.9	478.621	496.864	479.388	244.073	303.252	306.159	275.943	264.353	1.18843	0.868215	P08518
sp|P53154|GUP1_YEAST	92.197	67.5334	77.3552	85.1084	81.0429	719.928	503.564	713.245	681.195	795.139	0.954913	0.86806	P53154
sp|P47122|GPN1_YEAST	590.908	626.886	555.916	666.973	664.89	143.009	225.859	180.141	187.583	174.477	1.48869	0.867926	P47122
sp|Q07878|VPS13_YEAST	397.237	393.283	360.288	372.249	407.533	385.508	384.868	389.328	348.957	411.983	1.00838	0.867507	Q07878
sp|P38821|DNPEP_YEAST	556.639	567.856	551.556	512.029	532.779	232.709	243.866	243.749	196.257	251.591	1.02725	0.867315	P38821
sp|P32449|AROG_YEAST	666.234	705.285	704.513	659.122	665.418	106.579	94.4395	119.846	97.2373	117.83	0.837036	0.867225	P32449
sp|P14906|SEC63_YEAST	81.8737	73.2662	87.6896	99.4211	95.9536	713.877	642.624	675.328	663.907	669.22	1.00594	0.867086	P14906
sp|P38426|TPS3_YEAST	633.254	610.287	628.993	591.924	663.357	127.971	124.817	170.684	139.264	162.343	1.01206	0.867014	P38426
sp|P24719|MEK1_YEAST	680.301	516.305	713.639	671.28	677.809	105.361	118.715	141.547	115.429	115.735	1.48464	0.866939	P24719
sp|Q12494|KCS1_YEAST	587.018	722.232	557.67	641.89	590.899	144.226	184.077	167.064	166.626	128.177	1.03736	0.866515	Q12494
sp|P39743|RV167_YEAST	209.25	237.572	223.43	225.442	229.424	568.553	552.601	593.751	518.924	507.81	0.856071	0.86618	P39743
sp|P32611|RML2_YEAST	276.999	326.596	266.023	297.298	357.38	441.526	417.425	473.956	458.793	541.843	0.801842	0.866172	P32611
sp|P15454|KGUA_YEAST	691.081	748.127	669.15	684.133	684.659	72.589	87.9481	86.227	76.3423	90.4756	1.1192	0.865974	P15454
sp|P39683|NPT1_YEAST	659.151	655.727	651.044	608.374	601.89	116.862	146.484	154.987	125.358	128.539	1.26002	0.865561	P39683
tr|H3BR34|H3BR34_HUMAN	108.796	158.715	136.27	150.17	82.9884	676.334	500.61	658.204	627.801	724.94	0.507379	0.865523	H3BR34
sp|Q12010|YPQ1_YEAST	466.507	792.781	72.9759	83.2162	596.188	440.943	323.034	371.241	366.379	398.309	0.431093	0.865459	Q12010
sp|Q12450|ERP4_YEAST	132.272	127.383	137.845	139.952	134.173	668.625	613.192	630.155	553.592	628.258	0.952291	0.865274	Q12450
sp|P07267|CARP_YEAST	181.891	152.58	209.996	224.339	212.738	589.501	539.465	597.58	552.346	596.421	1.09092	0.865206	P07267
sp|P33331|NTF2_YEAST	711.42	790.341	718.653	670.386	711.294	59.5006	72.4632	96.9794	78.2715	96.2136	1.09625	0.865204	P33331
sp|Q04947|RTN1_YEAST	104.785	93.3339	104.25	102.652	102.499	701.587	629.621	714.581	608.683	634.622	1.00753	0.865062	Q04947
sp|Q03048|COFI_YEAST	640.719	711.581	709.161	635.624	660.024	101.289	98.5291	122.468	94.948	97.9362	0.875882	0.864984	Q03048
sp|Q3E846|COA6_YEAST	209.169	248.525	231.52	234.122	300.344	484.707	450.5	582.858	509.701	591.581	0.782246	0.864769	Q3E846
sp|Q92542|NICA_HUMAN	658.392	673.966	623.83	546.003	587.014	147.944	158.472	182.619	138.176	160.802	1.04641	0.864483	Q92542
sp|P37299|QCR10_YEAST	98.5424	86.7389	85.2248	95.2657	113.628	699.826	636.073	677.768	654.733	651.292	1.03258	0.864196	P37299
sp|Q12438|GLRX6_YEAST	126.434	96.9474	152.188	148.285	154.853	683.749	484.304	636.382	535.848	753.086	0.923739	0.864185	Q12438
sp|P42940|ETFB_YEAST	516.609	538.792	506.218	472.802	574.23	310.705	276.34	224.215	180.923	264.424	0.852779	0.863947	P42940
sp|P19262|ODO2_YEAST	376.877	341.001	335.832	330.678	381.727	522.527	466.647	345.588	293.986	403.012	0.987017	0.863946	P19262
sp|P32629|ANP1_YEAST	118.323	100.188	134.672	127.058	94.2484	744.111	528.492	638.632	520.466	797.911	0.838798	0.86381	P32629
sp|P53740|YN8S_YEAST	104.501	102.088	113.235	142.68	163.773	707.601	582.219	589.265	641.355	681.059	0.842255	0.863783	P53740
sp|P21576|VPS1_YEAST	414.912	426.013	433.793	426.173	421.485	334.26	359.397	372.205	315.836	355.077	1.04718	0.863728	P21576
sp|Q12270|RBD2_YEAST	115.71	52.4588	153.369	147.22	97.4442	718.859	388.994	716.94	594.334	802.234	1.19358	0.863606	Q12270
sp|P42942|YG4I_YEAST	642.624	639.089	530.812	591.47	620.781	175.551	164.455	169.938	163.473	169.234	0.941973	0.863304	P42942
sp|P32377|MVD1_YEAST	694.065	652.316	730.687	699.661	662.74	114.974	92.622	128.682	106.349	110.732	0.857153	0.863102	P32377
sp|Q02795|OSTD_YEAST	94.8082	96.3667	76.8907	81.8667	96.2948	691.788	693.907	694.866	638.461	627.516	0.98684	0.862979	Q02795
sp|Q05515|SVF1_YEAST	595.984	543.998	653.186	658.75	566.965	145.416	148.813	171.855	149.559	169.467	1.12116	0.86291	Q05515
sp|P33303|SFC1_YEAST	122.982	117.138	71.0801	80.5783	107.715	865.953	739.147	542.666	530.707	537.889	0.896148	0.862684	P33303
sp|P47169|MET5_YEAST	532.617	457.102	668.015	654.194	761.094	139.32	114.95	174.5	147.415	207.99	0.961381	0.862636	P47169
sp|P32481|IF2G_YEAST	566.181	570.341	573.091	576.71	524.297	201.582	222.577	224.992	195.015	200.188	1.0961	0.861326	P32481
sp|Q03798|AIM36_YEAST	89.4274	77.8079	72.7191	90.0834	105.354	662.401	562.501	663.292	707.328	807.224	0.976	0.860836	Q03798
sp|P11491|PPB_YEAST	131.278	124.922	109.288	118.357	115.474	655.279	565.043	638.406	594.72	717.34	0.906169	0.860193	P11491
sp|P15891|ABP1_YEAST	664.619	692.367	682.452	651.323	674.188	91.0965	87.0534	131.379	107.847	99.2232	0.917319	0.86012	P15891
sp|Q08686|THTR_YEAST	655.647	516.393	624.109	626.197	673.383	163.127	162.795	152.665	131.739	149.026	1.26709	0.860051	Q08686
sp|Q03362|YD476_YEAST	87.1626	72.5194	88.4487	86.3957	90.0941	745.268	637.836	718.417	603.12	673.591	1.02866	0.859461	Q03362
sp|Q06169|PEX30_YEAST	114.874	103.448	88.8872	118.585	126.154	677.602	623.613	594.642	681.487	635.781	1.02197	0.859038	Q06169
sp|P38244|PFF1_YEAST	92.5484	99.682	98.3101	116.522	110.751	694.632	599.254	658.884	670.756	735.273	0.800955	0.858909	P38244
sp|P47025|MDV1_YEAST	117.957	119.886	122.405	151.481	150.295	641.209	568.226	606.669	644.835	650.344	0.871917	0.858893	P47025
sp|P34222|PTH2_YEAST	98.9771	105.178	102.986	123.056	125.846	710.358	618.014	651.125	667.987	655.071	0.818711	0.858579	P34222
sp|P30656|PSB5_YEAST	598.359	244.599	718.35	760.059	516.605	170.534	196.733	214.291	194.662	194.554	2.82212	0.858548	P30656
sp|P38715|GRE3_YEAST	640.09	668.508	663.64	619.435	632.391	117.156	126.15	140.816	112.815	128.43	1.03099	0.858327	P38715
sp|P36147|PAM17_YEAST	86.4998	66.2449	72.8784	83.7888	115.316	765.488	619.602	660.865	652.113	691.302	1.05691	0.858269	P36147
sp|P49089|ASNS1_YEAST	714.933	591.497	685.733	694.351	588.25	125.24	115.322	141.251	122.742	120.902	1.11296	0.858183	P49089
sp|Q12462|PEX11_YEAST	91.0758	97.3357	75.9976	88.0399	102.119	748.853	611.941	645.074	641.294	685.795	0.764616	0.858159	Q12462
sp|P53163|MNP1_YEAST	268.43	290.474	298.155	289.183	320.462	504.464	444.93	513.453	427.294	468.795	0.815053	0.858018	P53163
sp|P32340|NDI1_YEAST	92.7888	77.4144	80.6392	91.7742	106.461	767.528	644.98	615.11	600.386	724.647	1.00722	0.857636	P32340
sp|Q12284|ERV2_YEAST	126.76	151.383	113.488	121.049	139.652	699.997	601.708	601.892	550.506	705.828	0.719772	0.857498	Q12284
sp|P33297|PRS6A_YEAST	567.734	630.742	563.759	615.302	551.391	182.505	197.754	197.803	185.078	183.27	0.975313	0.857288	P33297
sp|Q12460|NOP56_YEAST	279.314	313.823	302.187	325.386	271.596	434.865	533.932	487.998	450.372	443.838	1.0928	0.857098	Q12460
sp|Q08760|RAX1_YEAST	149.402	156.754	152.483	194.078	147.361	630.532	507.066	617.5	673.476	614.393	0.766469	0.856899	Q08760
sp|P32492|MYO4_YEAST	415.015	422.407	396.649	391.038	392.944	393.182	379.688	393.277	332.106	331.315	0.948781	0.856575	P32492
sp|Q03940|RUVB1_YEAST	394.308	463.342	387.592	410.66	397.324	338.698	387.09	395.438	358.859	344.109	0.972597	0.856521	Q03940
sp|P24280|SEC14_YEAST	529.396	522.954	557.259	520.147	509.869	203.531	249.344	267.926	214.185	227.803	1.24018	0.856456	P24280
sp|P30624|LCF1_YEAST	138.691	126.407	178.232	182.177	169.821	601.005	495.243	665.725	582.647	667.245	0.904102	0.856252	P30624
sp|P43619|NADC_YEAST	639.249	655.185	642.688	644.087	623.137	117.653	123.337	152.164	130.564	147.513	1.02281	0.856184	P43619
sp|P36526|RM27_YEAST	256.862	247.416	269.773	317.474	321.186	505.544	454.136	448.447	451.84	538.454	0.932609	0.85618	P36526
sp|P32288|GLNA_YEAST	725.481	564.275	720.697	579.209	671.261	132.913	122.87	159.515	109.757	139.787	1.18854	0.856143	P32288
sp|P38840|ARO9_YEAST	628.535	710.646	502.076	733.808	470.106	143.68	235.291	127.175	159.098	114.655	1.44839	0.855952	P38840
sp|P28777|AROC_YEAST	655.626	721.128	664.19	650.69	656.38	96.4743	120.753	123.467	103.53	106.662	1.13797	0.855924	P28777
sp|P32486|KRE6_YEAST	141.277	137.815	143.844	157.657	154.977	622.904	600.969	645.911	605.898	619.426	0.989018	0.855868	P32486
sp|P17558|RTPT_YEAST	379.952	430.975	418.474	400.541	485.621	406.277	346.311	323.806	265.246	378.318	0.751485	0.855825	P17558
sp|P53843|IST1_YEAST	293.032	237.822	285.328	289.862	298.763	502.707	399.569	522.62	454.235	470.856	0.979356	0.855554	P53843
sp|P40545|HIS4_YEAST	668.247	724.799	657.606	627.536	625.825	111.219	100.949	131.57	107.398	98.8773	0.836838	0.855391	P40545
sp|P33204|ARPC4_YEAST	636.987	633.972	564.437	577.505	585.817	151.223	220.904	197.569	172.888	138.915	1.46774	0.855274	P33204
sp|Q3E834|YOS1_YEAST	122.471	181.238	82.9471	75.6141	182.222	690.837	478.972	687.922	536.344	769.54	0.468511	0.85527	Q3E834
sp|Q12200|NPC1_YEAST	101.205	98.9898	107.057	115.437	116.162	669.498	564.129	689.301	635.631	738.822	0.861469	0.8552	Q12200
sp|Q12029|FSF1_YEAST	96.2874	85.4497	81.1374	97.7009	98.5097	715.261	705.427	631.578	650.354	660.203	1.11134	0.855156	Q12029
sp|Q12464|RUVB2_YEAST	396.968	415.574	368.867	399.619	383.603	345.517	396	412.995	382.456	358.612	1.0948	0.85479	Q12464
sp|P33330|SERC_YEAST	712.169	621.656	641.564	624.269	633.241	130.137	123.634	135.678	112.846	139.889	1.08835	0.854758	P33330
sp|P10849|MTF2_YEAST	445.027	376.976	419.993	420.111	403.545	398.11	393.899	305.588	261.264	410.583	1.16803	0.854715	P10849
sp|P40970|LCB2_YEAST	96.8471	84.3191	86.9662	96.5242	103.322	713.28	656.39	672.497	637.96	642.706	1.05697	0.854707	P40970
sp|P33310|MDL1_YEAST	98.6702	118.368	86.1968	108.743	117.117	706.684	613.182	632.347	681.682	687.286	0.723297	0.854511	P33310
sp|Q03941|CAB5_YEAST	165.894	188.652	148.361	168.066	170.386	622.341	550.377	585.196	566.362	667.953	0.777683	0.854344	Q03941
sp|Q2V2P4|YI156_YEAST	95.6896	136.188	78.9576	90.6623	120.447	744.875	703.918	630.347	618.108	606.27	0.663996	0.853988	Q2V2P4
sp|P25574|EMC1_YEAST	93.2794	77.4517	91.8825	101.183	104.914	723.076	620.693	681.935	641.264	655.071	1.03383	0.853922	P25574
sp|Q96VH5|MIC10_YEAST	98.1548	62.232	90.1843	103.744	116.296	732.03	603.418	648.937	637.135	723.058	1.30013	0.853489	Q96VH5
sp|Q04344|HNT1_YEAST	662.935	491.916	728.07	748.731	702.504	105.885	116.809	106.148	93.1486	92.7531	1.4867	0.853319	Q04344
sp|Q02724|ULP1_YEAST	294.733	363.014	314.702	327.674	344.946	410.34	479.371	465.486	413.57	442.613	0.948491	0.853297	Q02724
sp|P53108|YIP5_YEAST	130.785	125.008	152.384	154.506	153.417	614.945	569.041	687.608	594.877	641.424	0.968115	0.853258	P53108
sp|P39962|KC13_YEAST	111.275	101.581	126.936	128.822	105.89	672.908	619.283	668.664	579.006	696.882	1.00814	0.853243	P39962
sp|P40961|PHB1_YEAST	80.832	87.1446	84.7433	113.431	97.0246	666.473	693.664	619.489	707.433	712.414	0.965406	0.85315	P40961
sp|P33759|RT05_YEAST	328.85	0	490.144	508.687	251.774	552.701	265.862	464.789	411.496	493.512	#DIV/0!	0.853067	P33759
sp|P34216|EDE1_YEAST	531.698	535.055	531.281	515.525	531.741	243.956	230.251	273.808	226.634	225.818	0.9379	0.853008	P34216
sp|Q08199|SIL1_YEAST	354.679	359.224	347.263	360.395	355.638	478.285	424.815	391.18	346.165	416.616	0.876969	0.852681	Q08199
sp|P39986|ATC6_YEAST	84.4089	90.0652	84.461	92.2911	94.3583	722.066	641.485	698.414	650.554	647.471	0.832607	0.852446	P39986
sp|P09734|TBA3_YEAST	623.051	579.654	585.561	630.523	610.352	140.691	151.567	177.58	162.938	160.448	1.15796	0.852115	P09734
sp|Q06489|MTNA_YEAST	660.274	598.065	684.247	657.133	630.275	108.74	113.854	133.303	109.07	128.364	1.15594	0.851973	Q06489
sp|P27614|CBPS_YEAST	352.26	346.364	370.178	358.347	349.96	442.081	384.334	446.581	368.062	427.511	0.884174	0.851389	P27614
sp|P48563|MON2_YEAST	277.425	315.701	279.062	279.746	257.609	522.753	487.24	518.227	442.248	509.329	0.819063	0.8513	P48563
sp|Q06493|YLH47_YEAST	85.2301	102.38	90.2992	124.244	113.343	657.945	677.093	601.655	704.278	668.308	0.856712	0.850759	Q06493
sp|Q08924|WDR6_YEAST	581.97	661.453	549.587	508.497	555.647	190.461	207.34	242.534	190.824	187.076	0.957805	0.850372	Q08924
sp|P40075|SCS2_YEAST	92.602	81.3871	86.5427	93.7449	103.117	729.768	634.855	672.86	619.142	670.891	0.989816	0.84947	P40075
sp|Q07830|GPI13_YEAST	93.2208	111.816	89.2302	98.7868	109.397	687.663	605.629	697.88	656.119	677.558	0.734246	0.849209	Q07830
sp|P23201|SPA2_YEAST	560.74	462.351	533.738	549.504	540.906	201.342	264.813	274.278	239.691	234.111	1.59513	0.848823	P23201
sp|P27809|KRE2_YEAST	124.413	81.3142	132.354	131.756	118.98	722.859	542.542	639.067	539.892	757.922	1.14836	0.848647	P27809
sp|P21965|MCK1_YEAST	548.326	436.783	516.889	552.099	524.906	218.896	248.897	256.949	232.864	250.582	1.42743	0.848468	P21965
sp|Q05788|PNPH_YEAST	623.465	602.587	687.949	688.027	645.08	99.6486	109.536	147.224	124.888	139.944	1.13731	0.848191	Q05788
sp|Q08723|RPN8_YEAST	541.257	665.266	541.877	600.142	585.444	161.925	211.951	198.286	186.237	197.147	1.06495	0.848048	Q08723
sp|P21269|CCA1_YEAST	579.216	675.88	584.029	591.084	533.131	194.151	164.448	207.398	177.999	185.626	0.725872	0.848002	P21269
sp|P38986|ASPG1_YEAST	652.872	634.223	712.315	696.792	642.628	110.299	116.211	134.326	111.313	107.069	1.08458	0.84714	P38986
sp|P00546|CDK1_YEAST	594.924	557.884	534.195	521.722	577.986	206.905	187.115	257.265	212.687	186.426	0.964398	0.846486	P00546
sp|Q06839|YP097_YEAST	336.706	406.639	395.432	456.494	361.544	392.9	370.207	370.257	361.684	399.405	0.780197	0.846179	Q06839
sp|Q12109|SYWC_YEAST	623.711	660.059	596.213	599.738	601.594	144.813	167.926	175.856	149.669	151.524	1.09575	0.846087	Q12109
sp|P32799|COX13_YEAST	121.137	106.543	100.213	130.72	121.172	646.443	556.53	639.347	705.348	614.647	0.978843	0.845766	P32799
sp|P40362|UTP18_YEAST	278.447	319.924	263.973	346.521	290.078	372.957	578.108	450.914	500.341	375.622	1.3491	0.845283	P40362
sp|P32771|FADH_YEAST	613.891	736.122	595.947	601.864	592.007	141.768	157.397	161.728	138.049	147.515	0.925891	0.845191	P32771
sp|P27929|NAM9_YEAST	339.632	373.155	395.374	413.949	420.512	451.049	367.226	367.315	325.033	406.501	0.741017	0.845183	P27929
sp|Q12178|FCY1_YEAST	719.484	308.584	783.493	878.976	611.54	117.1	73.8642	114.136	108.218	102.18	1.47071	0.84515	Q12178
sp|Q07897|CMS1_YEAST	431.465	450.265	361.955	449.274	415.265	275.532	422.921	385.257	404.053	288.961	1.47083	0.84495	Q07897
sp|Q03219|YM44_YEAST	508.997	494.005	599.787	558.923	518.205	226.167	288.172	244.407	192.276	223.57	1.31282	0.84422	Q03219
sp|P32500|NDC1_YEAST	85.3762	93.9428	100.639	109.105	106.55	703.1	645.561	684.701	626.635	697.026	0.834437	0.844178	P32500
sp|P02381|RMAR_YEAST	346.92	395.466	326.668	333.854	306.001	444.37	426.562	429.224	370.309	530.654	0.842089	0.844169	P02381
sp|P29703|FNTA_YEAST	621.392	664.503	502.413	534.451	663.521	181.042	175.668	180.053	161.594	195.779	0.90736	0.843684	P29703
sp|P48353|HLJ1_YEAST	95.1519	108.735	83.8794	99.4906	111.627	683.949	730.439	635.09	635.263	637.122	0.934559	0.843319	P48353
sp|P40856|SA185_YEAST	556.793	581.576	587.176	603.718	591.822	145.511	185.509	219.015	189.789	212.705	1.22055	0.842815	P40856
sp|Q03430|RSM28_YEAST	390.284	400.852	386.916	397.28	475.539	403.142	450.362	338.098	292.551	352.545	1.08768	0.842711	Q03430
sp|P40557|EPS1_YEAST	111.118	128.047	134.901	132.238	142.208	687.759	536.262	625.455	516.551	680.077	0.676637	0.842507	P40557
sp|Q06892|POS5_YEAST	480.58	437.062	444.275	494.882	486.749	381.912	296.142	266.156	249.634	301.064	0.852629	0.842011	Q06892
sp|P53622|COPA_YEAST	524.363	457.751	558.053	582.261	500.398	221.006	215.303	273.728	240.465	243.853	1.11596	0.841958	P53622
sp|P49573|CTR1_YEAST	89.7281	107.141	54.3692	144.887	92.9659	663.528	751.642	422.22	947.193	636.931	0.948688	0.841828	P49573
sp|P34248|YKK0_YEAST	95.77	93.9808	104.411	110.157	102.322	711.332	654.07	680.463	604.319	690.817	0.937005	0.841771	P34248
sp|P46992|YJR1_YEAST	90.8199	85.4417	84.3159	103.041	116.677	702.25	639.833	665.692	684.661	701.605	0.96847	0.84159	P46992
sp|Q12511|PDP1_YEAST	272.356	300.639	210.516	254.08	273.62	561.182	546.714	459.866	467.068	498.191	0.882568	0.841519	Q12511
sp|P47054|NU192_YEAST	138.817	127.491	145.727	152.39	158.807	701.11	528.511	618.384	544.166	668.297	0.820785	0.841503	P47054
sp|P29311|BMH1_YEAST	635.219	562.543	630.382	609.51	609.015	141.748	173.531	195.807	159.267	148.891	1.38238	0.841245	P29311
sp|Q12189|RPIA_YEAST	684.458	691.999	654.089	601.685	636.949	117.269	125.041	135.73	105.017	125.218	1.05465	0.84111	Q12189
sp|Q04396|LPP1_YEAST	146.372	198.727	181.652	200.106	223.242	566.109	368.438	611.423	566.517	768.734	0.479364	0.841108	Q04396
sp|P42935|ELP2_YEAST	664.899	52.0242	831.971	733.622	457.503	196.264	159.21	259.604	192.542	237.274	10.3676	0.841102	P42935
sp|P00359|G3P3_YEAST	667.66	597.798	705.628	690.386	545.15	115.416	111.326	144.759	119.121	132.679	1.07729	0.841062	P00359
sp|P38799|YHN8_YEAST	214.112	207.299	99.6297	138.28	141.029	660.698	469.495	552.023	644.192	719.601	0.733956	0.840789	P38799
sp|P40150|HSP76_YEAST	509.258	478.908	563.838	548.2	457.314	264.175	287.655	255.588	208.831	270.191	1.15789	0.840369	P40150
sp|P32501|EI2BE_YEAST	631.414	670.29	588.038	560.236	634.156	135.418	202.084	174.579	139.744	175.898	1.40575	0.840188	P32501
sp|P80428|ARP4_YEAST	358.447	310.54	258.606	370.673	368.039	363.234	514.599	412.312	496.128	427.313	1.63527	0.83949	P80428
sp|P38009|PUR92_YEAST	818.558	604.536	675.913	494.966	628.288	155.939	107.054	164.443	101.073	128.588	0.929556	0.839335	P38009
sp|P32419|MDHP_YEAST	185.606	189.647	159.98	153.603	173.187	599.285	694.198	584.717	471.145	583.512	1.13369	0.839217	P32419
sp|Q12019|MDN1_YEAST	501.35	490.295	523.746	492.176	483.931	290.746	253.026	301.767	237.929	293.488	0.889887	0.839028	Q12019
sp|P32626|ENOPH_YEAST	627.683	632.931	654.809	726.926	641.817	98.6114	95.1421	137.967	128.461	127.748	0.956819	0.838725	P32626
sp|P33299|PRS7_YEAST	554.504	583.81	564.015	605.152	541.879	186.284	205.2	218.789	196.799	199.781	1.04625	0.838348	P33299
sp|Q02204|RM13_YEAST	269.912	178.076	291.681	295.572	305.663	497.133	465.637	511.419	434.462	564.823	1.41969	0.838341	Q02204
sp|P47127|AIM24_YEAST	94.7716	103.225	88.2163	99.5981	123.69	689.518	629.353	662.469	626.94	723.014	0.837994	0.83822	P47127
sp|P32796|CACP_YEAST	393.102	377.198	285.246	310.299	294.773	599.005	516.369	353.377	322.128	389.181	0.898392	0.837969	P32796
sp|P32332|OAC1_YEAST	98.9084	80.4344	83.8992	99.4252	113.48	688.528	665.246	647.96	643.409	673.095	1.1881	0.837917	P32332
sp|P14832|CYPH_YEAST	654.526	680.084	698.036	688.077	635.468	90.894	90.2071	116.891	96.5369	100.875	0.955145	0.837825	P14832
sp|P00899|TRPE_YEAST	629.973	665.171	645.148	632.595	621.898	123.977	123.656	142.44	117.017	126.925	0.944631	0.837819	P00899
sp|P38137|FAT2_YEAST	152.774	163.075	125.09	133.693	129.946	704.747	752.285	561.454	502.682	561.596	1.00002	0.837708	P38137
sp|P30822|XPO1_YEAST	580.491	575.223	651.641	616.356	558.357	170.006	162.51	211.512	167.576	189.69	0.964662	0.837634	P30822
sp|P16387|ODPA_YEAST	309.225	289.054	339.117	343.145	306.764	526.81	474.169	420.996	356.588	465.538	0.962884	0.837067	P16387
sp|P27810|KTR1_YEAST	111.606	116.849	119.982	121.39	126.566	715.83	536.858	652.126	552.222	725.372	0.716328	0.836978	P27810
sp|Q03655|GAS3_YEAST	96.0284	89.9233	109.092	96.8269	115.795	643.523	548.147	776.876	576.956	707.061	0.909621	0.836737	Q03655
sp|P10659|METK1_YEAST	689.075	603.146	715.799	661.454	632.211	114.531	113.932	130.481	100.881	121.585	1.13649	0.836672	P10659
sp|P53099|TPN1_YEAST	232.042	594.683	118.025	113.874	289.147	607.31	428.894	522.949	422.039	530.807	0.275563	0.836458	P53099
sp|Q07950|YEH2_YEAST	121.585	110.248	109.722	126.073	92.8364	702.233	486.209	690.67	663.279	716.635	0.763571	0.835785	Q07950
sp|P35908|K22E_HUMAN	274.951	443.021	425.136	455.745	602.168	312.872	422.675	352.931	316.18	256.209	0.838438	0.8357	P35908
sp|Q02892|NOG1_YEAST	477.468	497.237	502.309	501.696	467.614	317.082	240.98	281.892	235.26	318.465	0.729778	0.835592	Q02892
sp|P33317|DUT_YEAST	648.778	679.285	656.629	646.836	683.829	112.676	98.4312	118.579	97.5603	99.5945	0.834345	0.835201	P33317
sp|P43612|SA155_YEAST	588.525	591.338	639.003	621.266	591.058	162.563	167.824	189.39	153.776	160.197	1.02745	0.835136	P43612
sp|P40395|RIC1_YEAST	254.041	199.705	289.459	297.501	294.661	582.517	367.755	516.583	443.317	561.408	0.803092	0.834973	P40395
sp|Q12499|NOP58_YEAST	291.289	307.241	311.81	345.881	287.497	450.666	495.074	485.789	449.842	466.615	1.0415	0.834787	Q12499
sp|P53982|IDHH_YEAST	529.333	505.461	495.374	445.135	559.84	292.051	322.116	248.349	186.214	268.674	1.15503	0.834436	P53982
sp|P23641|MPCP_YEAST	88.0075	73.4145	86.0132	96.2744	97.3738	702.778	654.092	668.916	624.089	706.281	1.11573	0.833545	P23641
sp|P33313|CNS1_YEAST	605.664	728.893	606.325	655.431	606.408	133.068	147.996	148.069	133.368	119.247	0.924157	0.833234	P33313
sp|P53879|RHO5_YEAST	152.735	152.139	174.356	182.667	167.163	621.894	516.844	669.781	584.636	603.343	0.834335	0.833164	P53879
sp|Q12207|NCE2_YEAST	92.9162	96.5497	81.6112	117.97	110.386	681.565	678.896	621	747.844	626.189	0.958596	0.833105	Q12207
sp|P03962|PYRF_YEAST	650.663	439.851	637.759	620.519	580.19	154.754	104.681	156.723	127.032	139.282	1.00063	0.833073	P03962
sp|P18900|COQ1_YEAST	240.486	245.193	255.425	289.203	292.79	504.52	507.127	490.959	462.916	536.375	0.985868	0.832757	P18900
sp|Q02931|UTP17_YEAST	268.074	372.52	289.677	364.687	278.293	402.35	548.618	470.156	492.652	380.008	0.981231	0.832323	Q02931
sp|Q00582|GTR1_YEAST	167.508	204.455	184.659	195.789	187.192	639.5	501.203	553.382	488.336	635.561	0.642115	0.83229	Q00582
sp|P16474|GRP78_YEAST	183.412	212.344	179.742	204.28	183.312	573.13	668.738	545.186	515.573	540.679	1.00784	0.832089	P16474
sp|P49095|GCSP_YEAST	443.828	438.004	449.646	415.283	490.771	400.524	333.253	313.37	240.406	297.623	0.843105	0.830642	P49095
sp|P11745|RNA1_YEAST	627.419	622.83	624.433	631.019	615.195	138.172	132.519	160.816	134.919	152.235	0.966154	0.830208	P11745
sp|P23180|AIM17_YEAST	421.92	404.47	464.647	452.835	516.611	373.261	336.194	276.861	223.922	367.949	0.939555	0.829884	P23180
sp|P40986|CDC1_YEAST	136.751	137.97	135.552	131.466	146.114	699.657	538.524	649.052	522.242	695.375	0.762897	0.829628	P40986
sp|P40502|AIM19_YEAST	148.437	150.915	117.193	132.4	167.86	676.216	607.966	602.71	564.596	655.032	0.884304	0.829169	P40502
sp|P38777|FSH1_YEAST	580.158	514.769	621.995	749.549	463.064	157.644	147.334	196.376	196.182	165.614	1.05332	0.829009	P38777
sp|P53206|CYSKL_YEAST	91.2739	96.0119	100.656	115.47	117.815	716.502	632.168	662.955	630.125	652.024	0.838758	0.828536	P53206
sp|P35206|CSG2_YEAST	97.2405	115.993	99.1367	111.543	115.806	674.006	631.616	676.67	630.764	674.801	0.785607	0.828483	P35206
sp|P07283|PMM_YEAST	685.003	731.015	652.291	631.753	652.423	111.454	113.505	126.937	101.846	117.398	0.954306	0.828416	P07283
sp|P53633|PRA1_YEAST	268.447	228.624	260.431	222.835	253.769	578.528	390.335	579.451	410.423	575.663	0.792227	0.827797	P53633
sp|Q12229|UBX3_YEAST	151.758	127.496	132.359	144.076	167.166	636.168	526.853	634.06	570.753	729.775	0.985762	0.826954	Q12229
sp|Q05521|DPP1_YEAST	101.465	77.9914	110.977	121.626	108.872	710.232	578.402	710.284	643.64	649.66	1.0595	0.826832	Q05521
sp|Q12487|RM23_YEAST	338.303	388.783	407.176	390.037	499.828	337.904	363.128	438.749	347.493	339.927	0.935115	0.826811	Q12487
sp|Q06103|RPN7_YEAST	557.967	622.321	531.567	582.61	516.131	195.677	219.285	219.387	198.78	211.224	1.00476	0.826686	Q06103
sp|P39940|RSP5_YEAST	334.708	326.978	325.593	308.754	342.544	425.571	451.235	494.811	387.892	436.749	1.08537	0.826673	P39940
sp|P32610|VATD_YEAST	394.777	393.642	345.932	348.077	382.022	405.682	483.138	419.003	348.323	329.99	1.19436	0.826191	P32610
sp|Q12349|ATP14_YEAST	137.541	111.651	141.87	158.909	213.152	597.684	526.14	615.538	569.609	638.724	1.08443	0.826161	Q12349
sp|P39078|TCPD_YEAST	499.087	516.325	457.329	477.69	495.973	276.768	323.943	291.673	251.541	240.747	1.13137	0.825647	P39078
sp|P19097|FAS2_YEAST	595.865	569.547	629.946	571.916	580.089	184.954	175.649	207.666	155.655	188.066	0.993573	0.8256	P19097
sp|P15019|TAL1_YEAST	684.818	672.885	667.096	637.894	669.013	111.348	102.987	123.436	97.436	103.829	0.941315	0.8255	P15019
sp|P15180|SYKC_YEAST	670.137	681.617	648.815	639.674	649.789	118.344	115.678	130.654	106.325	113.159	0.96101	0.825421	P15180
sp|P38298|YPC1_YEAST	45.8986	21.6805	116.976	124.554	84.0177	666.702	496.158	835.535	734.297	689.112	1.5755	0.825364	P38298
sp|P25618|CWH43_YEAST	86.4262	119.747	67.7621	76.426	93.5416	698.071	656.3	690.312	641.882	697.801	0.678553	0.824434	P25618
sp|Q04924|GLU2B_YEAST	276.106	254.15	198.843	221.021	212.15	596.081	472.783	533.329	488.714	574.676	0.861674	0.824397	Q04924
sp|P43611|OSW7_YEAST	87.5952	95.2041	88.473	108.574	102.885	712.7	622.998	646.722	654.152	681.383	0.804275	0.824229	P43611
sp|P10081|IF4A_YEAST	668.451	660.505	658.254	634.659	621.966	122.081	131.908	139.962	111.178	128.977	1.0935	0.823876	P10081
sp|P38765|YHI9_YEAST	637.846	767.693	637.835	626.907	669.714	89.3232	111.181	134.432	108.831	107.843	1.03418	0.823676	P38765
sp|Q12271|INP53_YEAST	456.424	460.339	490.14	516.124	466.99	291.917	284.178	322.089	279.339	344.479	0.965211	0.82361	Q12271
sp|Q01574|ACS1_YEAST	756.323	694.798	524.19	534.48	515.612	183.24	139.175	168.181	141.188	156.138	0.826781	0.823341	Q01574
sp|P34237|CASP_YEAST	135.291	157.41	144.378	156.574	155.933	652.588	561.798	614.14	548.185	664.837	0.739905	0.823074	P34237
sp|P25369|LSB5_YEAST	640.618	640.356	567.288	580.298	617.829	197.997	148.672	167.336	140.877	165.668	0.751187	0.823006	P25369
sp|P13188|SYQ_YEAST	636.133	598.64	686.889	662.984	611.777	125.856	120.403	154.606	122.766	135.157	1.01659	0.822689	P13188
sp|P34221|PP2C3_YEAST	708.854	717.26	614.116	578.752	641.124	129.446	121.912	137.908	106.918	124.415	0.93076	0.822659	P34221
sp|P28496|LAC1_YEAST	91.8246	87.5731	85.2873	96.6075	110.091	735.399	660.922	649.658	605.158	649.859	0.942357	0.822351	P28496
sp|P23638|PSA3_YEAST	611.116	663.218	626.037	648.074	610.217	118.83	161.789	160.103	136.281	151.2	1.25456	0.82226	P23638
sp|P41911|GPD2_YEAST	625.116	697.716	571.82	594.069	554.02	194.653	191.387	171.762	146.687	184.615	0.880914	0.822028	P41911
sp|P47140|AIM25_YEAST	85.4827	83.6312	84.9972	112.031	109.922	688.696	619.286	653.783	708.327	692.568	0.919123	0.821988	P47140
sp|P53301|CRH1_YEAST	99.7008	90.5753	113.943	93.5869	144.671	586.976	547.887	847.071	571.786	705.056	1.02745	0.821836	P53301
sp|P13663|DHAS_YEAST	671.91	696.769	644.595	637.411	637.702	113.765	107.204	125.101	101.644	117.372	0.908707	0.821654	P13663
sp|P07703|RPAC1_YEAST	433.942	528.831	447.161	481.978	424.124	276.548	361.858	338.191	299.459	215.157	1.0737	0.821507	P07703
sp|P47176|BCA2_YEAST	761.079	631.709	616.549	592.047	617.365	117.488	126.151	139.952	110.392	114.196	1.29363	0.821428	P47176
sp|P40046|VTC1_YEAST	103.583	124.519	86.7474	94.0867	131.4	693.897	668.007	655.95	584.117	678.752	0.800825	0.821026	P40046
sp|P53220|TIM21_YEAST	94.7504	89.2427	94.7651	97.4469	109.549	725.973	602.941	699.558	590.609	700.408	0.881786	0.821025	P53220
sp|P00925|ENO2_YEAST	675.579	679.726	662.575	623.582	649.135	102.637	102.484	124.737	96.379	115.567	0.992419	0.820973	P00925
sp|P36090|ANR2_YEAST	121.027	137.848	110.739	142.448	149.83	652.383	631.721	576.575	608.869	715.016	0.850168	0.820944	P36090
sp|Q12001|ALG6_YEAST	93.0712	44.0553	86.3582	110.539	43.142	816.368	457.567	704.723	740.479	710.569	1.18409	0.820885	Q12001
sp|P15624|SYFB_YEAST	645.92	722.296	648.907	608.437	627.491	129.339	115.9	151.739	116.78	128.984	0.801341	0.820801	P15624
##sp|Q08281|RTC1_YEAST	867.116	912.827	360.797	346.581	943.237	87.1308	173.536	102.794	80.972	52.5006	1.89194	0.820022	Q08281
sp|P36523|RM15_YEAST	276.564	295.828	321.24	338.304	320.027	494.244	424.253	488.052	421.41	490.947	0.802492	0.8199	P36523
sp|Q07451|YET3_YEAST	83.2388	100.65	83.9298	101.282	92.6224	695.756	687.238	665.716	658.371	667.097	0.816891	0.819534	Q07451
sp|P36421|SYYC_YEAST	647.96	659.997	632.124	595.602	608.168	145.635	154.836	167.68	129.456	139.504	1.04379	0.81938	P36421
sp|P12612|TCPA_YEAST	567.302	591.896	539.265	543.927	538.887	207.676	242.948	238.879	197.415	202.15	1.12124	0.819339	P12612
sp|P38297|FZO1_YEAST	111.919	117.804	109.497	142.272	147.848	650.611	611.48	624.567	664.481	702.124	0.89291	0.818817	P38297
sp|P38348|HSM3_YEAST	612.535	569.721	614.23	621.302	608.626	169.837	147.836	216.985	179.659	122.258	0.935874	0.818557	P38348
sp|P36152|DRE2_YEAST	631.126	832.868	595.873	732.335	627.393	90.229	116.611	111.227	111.812	98.841	0.979342	0.817941	P36152
sp|P53722|ATP23_YEAST	109.45	111.182	63.0201	89.905	134.84	580.581	548.193	680.918	793.178	760.156	0.929505	0.816528	P53722
sp|P53305|RT27_YEAST	333.941	243.1	477.841	450.87	462.42	410.08	350.87	343.09	264.19	474.475	1.17534	0.816093	P53305
sp|P18562|UPP_YEAST	656.088	685.76	677.178	643.415	619.335	110.253	110.054	127.817	99.0252	108.437	0.955002	0.815397	P18562
sp|P38884|AIM18_YEAST	144.759	158.311	115.877	148.948	166.064	639.416	570.202	583.54	611.365	700.39	0.815419	0.815065	P38884
sp|Q07800|PSR1_YEAST	84.1141	173.193	110.857	145.595	149.123	709.159	575.404	597.129	639.173	650.714	0.394065	0.81502	Q07800
sp|P53954|ALG11_YEAST	108.923	111.772	89.1234	108.229	127.178	691.53	645.066	665.148	658.293	613.523	0.909029	0.814983	P53954
sp|P23542|AATC_YEAST	553.43	496.21	606.251	582.504	486.346	208.309	212.056	274.757	215.135	225.871	1.13537	0.814919	P23542
sp|P22135|ATP12_YEAST	519.072	580.301	520.295	524.584	650.056	291.927	175.735	192.641	158.267	238.717	0.538466	0.814847	P22135
sp|Q02630|NU116_YEAST	173.812	163.457	157.23	166.588	182.809	641.087	581.858	597.895	516.182	617.847	0.965108	0.814831	Q02630
sp|Q04767|TVP18_YEAST	141.65	140.853	128.812	142.737	157.895	655.374	593.739	643.567	580.988	637.585	0.911081	0.814692	Q04767
sp|P53691|PPID_YEAST	524.553	797.761	528.737	709.507	533.379	115.541	196.518	153.541	167.842	143.672	1.11836	0.814628	P53691
sp|P27472|GYS2_YEAST	341.093	302.343	298.21	304.542	330.714	519.056	317.411	442.985	368.3	594.043	0.689891	0.814119	P27472
sp|P38226|CST26_YEAST	144.477	108.892	96.5054	120.334	139.115	631.07	635.104	665.788	675.512	636.904	1.33528	0.813694	P38226
sp|P43569|CAF16_YEAST	645.814	583.463	670.587	705.424	663.612	102.543	99.8977	143.06	122.389	127.845	1.07831	0.81326	P43569
sp|P53724|RM50_YEAST	380.405	418.813	336.77	356.13	434.111	428.742	365.159	398.335	342.526	384.784	0.773594	0.813148	P53724
sp|Q12458|YPR1_YEAST	644.631	620.842	704.572	662.894	673.572	121.874	111.784	124.244	95.0193	110.276	0.952355	0.812863	Q12458
sp|P07991|OAT_YEAST	598.162	692.682	606.955	645.028	697.567	125.147	98.0211	150.515	130.02	145.463	0.676366	0.812844	P07991
sp|P25340|ERG4_YEAST	69.549	63.3648	83.2388	87.6155	87.1046	708.44	558.547	747.188	639.267	683.887	0.865365	0.812825	P25340
sp|P00817|IPYR_YEAST	670.496	592.861	739.125	693.097	660.331	101.382	95.2236	127.227	96.9252	104.596	1.06225	0.812421	P00817
sp|P40016|RPN3_YEAST	588.576	613.552	556.071	604.277	576.467	177.527	199.94	198.644	175.349	197.971	1.0804	0.812311	P40016
sp|P24279|MCM3_YEAST	538.906	579.461	593.481	545.606	582.023	205.632	206.299	246.257	183.865	213.266	0.933027	0.812151	P24279
sp|P38791|DHYS_YEAST	662.983	659.25	664.168	620.173	643.131	100.008	127.63	145.656	110.439	122.638	1.28342	0.812007	P38791
sp|P06197|PIS_YEAST	108.765	157.574	85.293	90.6834	124.785	663.252	673.003	710.13	612.921	615.043	0.70039	0.811806	P06197
sp|Q08548|ALE1_YEAST	102.665	108.626	113.943	127.46	112.646	696.835	553.156	699.01	634.644	675.133	0.750248	0.811632	Q08548
sp|P32614|FRDS_YEAST	637.677	621.887	656.779	661.031	629.889	117.233	113.018	154.202	125.949	157.339	0.988521	0.811526	P32614
sp|P53860|PDR16_YEAST	330.445	353.551	314.548	363.013	331.836	391.193	467.183	474.532	444.42	379.856	1.11621	0.81151	P53860
sp|Q03088|SVL3_YEAST	494.911	490.53	465.36	494.973	495.796	286.723	274.497	296.668	255.961	301.296	0.96591	0.811169	Q03088
sp|P23644|TOM40_YEAST	86.6408	64.0507	88.0985	95.898	97.2402	687.124	635.202	695.204	613.741	746.796	1.25048	0.811021	P23644
sp|P46680|AIP1_YEAST	657.759	685.467	673.59	642.107	581.119	124.572	121.781	151.305	116.963	115.895	0.938078	0.810934	P46680
sp|Q03201|RT10_YEAST	349.398	396.754	406.67	391.937	446.595	406.953	401.054	342.895	267.98	426.323	0.867876	0.810899	Q03201
sp|P39005|KRE9_YEAST	179.294	173.886	142.399	190.851	185.939	609.98	544.085	591.242	642.341	586.9	0.919716	0.810611	P39005
sp|P53959|COG6_YEAST	322.764	351.868	298.115	337.812	312.374	453.214	496.87	423.52	388.997	462.408	1.00564	0.81055	P53959
sp|P02829|HSP82_YEAST	476.927	878.771	491.741	801.248	545.82	109.093	172.659	121.84	160.832	104.451	0.858954	0.810127	P02829
sp|P43616|DUG1_YEAST	632.754	614.731	661.016	638.922	649.526	141.604	126.126	153.645	120.305	133.444	0.916812	0.810081	P43616
sp|P34077|NIC96_YEAST	121.695	124.614	140.493	144.487	133.927	694.493	603.746	637.437	530.947	683.106	0.848968	0.809915	P34077
sp|Q00764|TPS1_YEAST	595.658	628.87	607.963	585.765	578.076	179.468	141.846	203.537	158.791	188.397	0.748628	0.809725	Q00764
sp|P38628|AGM1_YEAST	627.031	667.932	623.497	637.593	702.395	116.141	110.098	139.374	115.398	127.85	0.88992	0.80967	P38628
sp|Q04935|COX20_YEAST	100.618	104.055	84.124	105.89	105.639	714.241	630.801	622.59	634.513	723.905	0.853998	0.809662	Q04935
sp|P17157|PHO85_YEAST	561.017	481.582	581.056	560.748	556.821	211.204	208.459	257.963	201.533	231.949	1.1498	0.809542	P17157
sp|Q04177|UTP5_YEAST	254.988	311.505	282.308	383.607	278.968	401.425	495.802	472.246	519.469	402.642	1.01102	0.809521	Q04177
sp|Q04338|VTI1_YEAST	114.934	79.3736	116.67	110.938	138.421	711.113	598.041	669.825	515.58	738.554	1.21777	0.809493	Q04338
sp|P38068|GLRX7_YEAST	155.246	165.181	132.523	135.379	124.739	707.926	591.059	600.836	496.684	675.137	0.784702	0.809216	P38068
sp|Q02774|SHR3_YEAST	138.676	131.246	129.362	140.98	139.051	653.973	615.898	656.87	579.266	636.263	0.995092	0.809185	Q02774
sp|P38071|ETR1_YEAST	504.114	519.223	489.154	479.754	538.932	325.163	297.645	237.485	188.464	250.679	0.888735	0.809129	P38071
sp|P54730|UBX4_YEAST	530.854	563.906	508.835	660.851	543.501	184.451	243.94	216.177	227.004	195.205	1.24501	0.808534	P54730
sp|P38205|NCL1_YEAST	694.953	703.394	681.986	646.157	646.06	107.776	115.351	135.704	103.936	113.301	1.05744	0.808369	P38205
sp|Q03264|NGL2_YEAST	606.523	786.429	566.788	633.384	672.988	115.24	149.942	117.443	106.057	139.433	1.00348	0.808096	Q03264
sp|P21375|OSM1_YEAST	131.225	134.136	122.257	120.747	146.72	666.878	554.484	691.737	551.956	672.378	0.813414	0.807905	P21375
sp|P25379|STDH_YEAST	355.465	502.707	340.239	420.237	302.325	426.531	571.105	363.932	363.074	292.495	0.946777	0.807726	P25379
sp|P43588|RPN11_YEAST	529.843	630.17	535.461	627.187	531.726	182.406	206.769	226.324	214.005	180.795	0.953095	0.807282	P43588
sp|P40825|SYA_YEAST	646.125	668.022	648.654	632.593	634.949	124.3	121.355	151.178	118.983	128.231	0.944308	0.807024	P40825
sp|P53107|YRB30_YEAST	562.701	658.384	626.883	591.355	530.377	190.937	197.841	182.255	138.693	189.51	0.885574	0.806702	P53107
sp|Q12449|AHA1_YEAST	585.381	712.287	585.313	619.759	589.992	149.192	160.81	181.299	154.842	180.429	0.885831	0.8066	Q12449
sp|P38795|NADE_YEAST	574.409	616.054	611.765	597.969	571.158	182.253	177.62	196.439	154.852	174.939	0.908702	0.806486	P38795
sp|P38555|YPT31_YEAST	127.763	140.139	100.75	104.301	121.185	719.878	659.715	650.981	543.328	679.813	0.835492	0.806215	P38555
sp|P39960|BEM2_YEAST	432.739	341.305	491.686	434.392	406.116	347.935	353.024	398.834	284.045	352.301	1.28644	0.80612	P39960
sp|P13517|CAPZB_YEAST	669.318	652.732	597.949	613.67	700.588	144.141	116.068	135.618	112.193	128.971	0.825698	0.80608	P13517
sp|P46985|MNN11_YEAST	113.089	104.466	117.759	125.564	123.983	696.45	548.812	654.539	562.525	750.463	0.853056	0.805998	P46985
sp|Q05016|YM71_YEAST	688.328	713.102	696.066	666.547	649.123	78.5657	102.549	128.941	99.486	117.275	1.25992	0.805734	Q05016
sp|Q12446|LAS17_YEAST	292.955	247.814	320.86	351.373	332.799	542.904	391.156	526.841	464.782	348.544	0.851732	0.805596	Q12446
sp|Q05506|SYRC_YEAST	655.886	615.823	648.244	634.281	616.769	137.396	134.995	158.816	125.175	132.017	1.04644	0.805527	Q05506
sp|P40472|SIM1_YEAST	243.981	24.1465	308.657	294.562	170.998	590.308	307.358	653.833	502.621	682.448	5.26098	0.805515	P40472
sp|Q04894|ADH6_YEAST	640.933	63.0834	865.183	812.993	602.895	130.69	137.469	172.152	130.288	162.583	10.6871	0.805401	Q04894
sp|Q04199|CAC2_YEAST	329.46	382.943	281.767	414.082	410.236	340.984	383.602	441.472	522.509	379.391	0.967867	0.80537	Q04199
sp|P07149|FAS1_YEAST	605.813	498.209	644.895	570.872	560.788	187.472	172.726	225.593	160.803	194.858	1.12034	0.80523	P07149
sp|P46951|YPP1_YEAST	359.92	403.176	323.421	373.139	334.721	430.191	451.06	439.032	407.748	382.461	0.936018	0.804994	P46951
[truncated: 597 more rows]
